# Supplementary material for: Asymmetric imidazole-4,5-dicarboxamide derivatives as SARS-CoV-2 main protease inhibitors: design, synthesis and biological evaluation
Source: Royal Society of Chemistry journal article supplement (doi:10.1039/d4md00414k), 2024-01-01
Supplement: d4md00414k1.pdf [file d4md00414k1.pdf]

## SUPPORTING INFORMATION

### FOR

#### **Asymmetric imidazole-4,5-dicarboxamides derivatives as SARS-CoV-2 main protease inhibitors: Design, Synthesis and Biological Evaluation**

Phuong Nguyen Hoai Huynh<sup>1</sup>, Phatcharin Khamplong<sup>2</sup>, Minh-Hoang Phan<sup>1</sup>, Thanh-Phuc Nguyen<sup>1</sup>, Phuong Ngoc Lan Vu<sup>1</sup>, Quang-Vinh Tang<sup>1</sup>, Phumin Chamsodsai<sup>3</sup>, Supaphorn Seetaha<sup>3</sup>, Truong Lam Tuong<sup>1</sup>, Thien Y Vu<sup>4</sup>, Duc-Duy Vo<sup>5,6,7</sup>, Kiattawee Choowongkamon<sup>2,3\*</sup>, Cam-Van T. Vo<sup>1\*</sup>

<sup>1</sup>Department of Medicinal Chemistry, Faculty of Pharmacy, University of Medicine and Pharmacy at Ho Chi Minh city, Vietnam

<sup>2</sup>Department of Biochemistry, Faculty of Science, Kasetsart University, Bangkok, 10900 Thailand

<sup>3</sup>Genetic Engineering Interdisciplinary Program, Graduate School, Kasetsart University, Bangkok, 10900 Thailand;

<sup>4</sup>Faculty of Pharmacy, Ton Duc Thang University, Ho Chi Minh City, Vietnam

<sup>5</sup>Department of Cell and Molecular Biology, Biomedical Centre, Uppsala University, Husargatan 3, 75237 Uppsala, Sweden

<sup>6</sup>Department of Chemistry, Biomedical Centre, Uppsala University, Husargatan 3, 75237 Uppsala, Sweden

<sup>7</sup>School of Applied Chemistry, Tra Vinh University, 126 Nguyen Thien Thanh Street, Ward 5, Tra Vinh City, Viet Nam

Corresponding authors: [vocamvan@ump.edu.vn](mailto:vocamvan@ump.edu.vn); [kiattawee.c@ku.th](mailto:kiattawee.c@ku.th)

## 1. Chemical synthesis

**General chemistry information.** Room temperature is considered 27–30 °C. Reaction conditions are described in detail in the sections below. All commercial reagents and solvents from suppliers were used without further purification.

*TLC and column chromatography:* Thin-layer chromatography (TLC) was performed using TLC Silica gel 60 GF<sub>254</sub> precoated aluminium plates and the developed plates were visualized using Vilber Lourmat UV lamp. Normal phase flash column chromatography was run using silica gel 40 – 63 microns. The desired fractions from column chromatography (confirmed by TLC) were collected and concentrated under vacuum to afford the product.

*NMR:* All NMR data were collected at ambient temperature. All NMR solvents were purchased from Cambridge Isotoped. NMR spectra were processed with MestReNova software. <sup>1</sup>H-NMR spectra were obtained on Bruker 400, 500 or 600 MHz spectrometers. Proton chemical shifts were reported in ppm. Proton data were reported as chemical shifts, multiplicity (singlet (s), triplet (t), multiplet (m), ...), coupling constants [Hz] and integration. <sup>13</sup>C-NMR spectra were obtained on Bruker 100, 125, 150 MHz spectrometer. Carbon chemical shifts were reported in ppm.

*Infrared Spectroscopy:* Infrared spectra were recorded on FTIR 8201 PC Shimadzu spectrometer, and select  $\nu_{\max}$  were reported in cm<sup>-1</sup>.

*Mass Spectrometry:* Mass spectrometry was conducted by Shimadzu LCMS 8040, using ESI. The HRMS was conducted by Water Xevo G2-XS Qtof.

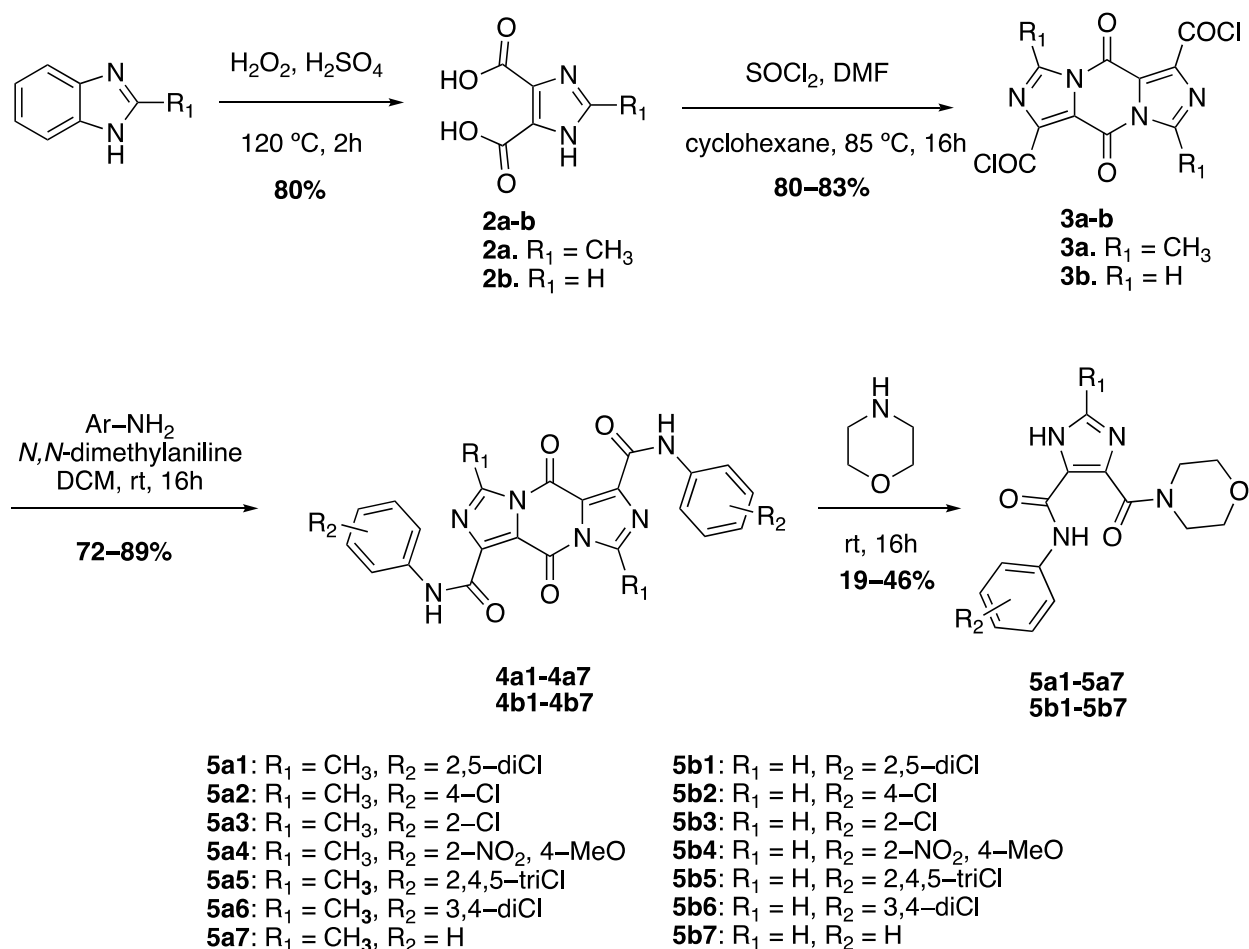

**Scheme S1.** Synthesis of asymmetric imidazole-4,5-dicarboxamide derivatives

### Analytical Characterization Data

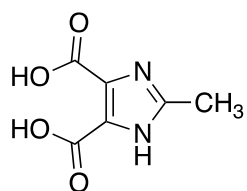

**2-Methyl-imidazole-4,5-dicarboxylic acid (2a).** Obtained as pale yellow solid; **Yield** 6.76 g, 80%; **M.p.** 255-256 °C; **IR** (cm<sup>-1</sup>): 3531, 1379; **<sup>1</sup>H-NMR** (400 MHz, DMSO-*d*<sub>6</sub>) δ (ppm): 2.49 (s, 3H); **<sup>13</sup>C-NMR** (100 MHz, DMSO-*d*<sub>6</sub>) δ (ppm): 159.80, 146.28, 128.34, 11.68, **MS-ESI:** C<sub>6</sub>H<sub>6</sub>N<sub>2</sub>O<sub>4</sub> *m/z* [M-H]<sup>-</sup> 169.02 (Calcd.), 168.75 (found). This compound has been reported.<sup>1</sup>

<sup>1</sup> M. A. Brusina, D. N. Nikolaev, S. M. Ramsh and L. B. Piotrovskii, *Russian Journal of Organic Chemistry*, 2016, **52**(10), 1528–1530.

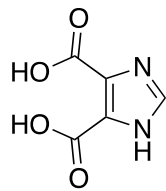

**Imidazole-4,5-dicarboxylic acid (2b):** Obtained as pale yellow solid; **Yield** 6.25 g, 80%; **M.p.** 264-266 °C; **IR** (cm<sup>-1</sup>): 3172, 1382; **<sup>1</sup>H-NMR** (600 MHz, DMSO-*d*<sub>6</sub>) δ (ppm): 9.11 (s, 1H, H2); **<sup>13</sup>C-NMR** (150 MHz, DMSO-*d*<sub>6</sub>) δ (ppm): 159.26, 135.47, 128.63; **MS-ESI:** C<sub>5</sub>H<sub>4</sub>N<sub>2</sub>O<sub>4</sub> *m/z* [M-H]<sup>-</sup> 155.01 (Calcd.), 155.16 (found). This compound has been reported.<sup>1</sup>

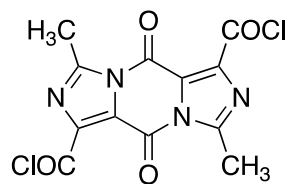

**3,8-Dimethyl-5,10-dioxo-5H,10H-diimidazo[1,5-*a*:1',5'-*d*]pyrazine-1,6-dicarbonyl dichloride (3a).** Obtained as pale brown solid; **Yield** 1.82 g, 83%; **M.p.** > 300 °C; **IR** (cm<sup>-1</sup>): 1757, 1344, 758. This compound has been reported.<sup>2</sup>

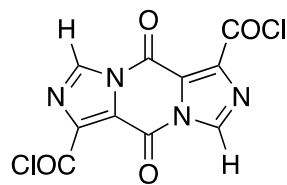

**5,10-dioxo-5H,10H-diimidazo[1,5-*a*:1',5'-*d*]pyrazine-1,6-dicarbonyl dichloride (3b)** Obtained as pale brown solid; **Yield** 1.62 g, 80%; **IR** (cm<sup>-1</sup>): 1597, 1381, 759. This compound has been reported.<sup>3</sup>

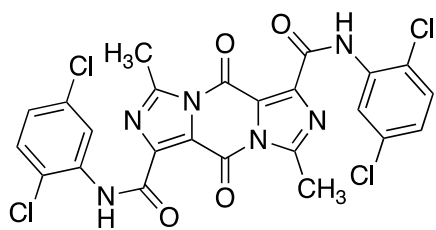

***N*<sup>1</sup>,*N*<sup>6</sup>-bis(2,5-dichlorophenyl)-3,8-dimethyl-5,10-dioxo-5H,10H-diimidazo[1,5-*a*:1',5'-*d*]pyrazine-1,6-dicarboxamide (4a1)** Obtained as yellow solid; **Yield** 0.95 g, 80%; **M.p.** 254-256 °C (decomposed); **IR** (cm<sup>-1</sup>): 3080, 1674, 1236.

<sup>2</sup> T.-V. Phan, P. N. H. Huynh, T.-P. Nguyen, T.-T. Vu, M.-T. Le, B. G. D. Nguyen, P. Truong and K.-M. Thai, *New Journal of Chemistry*, 2023, **47**, 20718-20722.

<sup>3</sup> A. V. Wiznycia, P. W Baures, *Journal of Organic Chemistry*, 2002, **67**(20), 7151-7154.

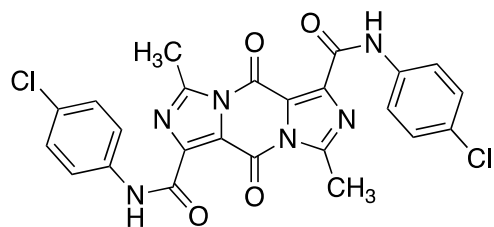

***N*<sup>1</sup>,*N*<sup>6</sup>-bis(4-chlorophenyl)-3,8-dimethyl-5,10-dioxo-5*H*,10*H*-diimidazo[1,5-*a*:1',5'-*d*]pyrazine-1,6-dicarboxamide (4a2)** Obtained as yellow solid; **Yield** 0.78 g, 75%; **M.p.** 251-253 °C (decomposed); **IR** (cm<sup>-1</sup>): 3262, 1674, 1298.

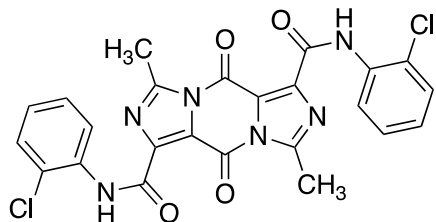

***N*<sup>1</sup>,*N*<sup>6</sup>-bis(2-chlorophenyl)-3,8-dimethyl-5,10-dioxo-5*H*,10*H*-diimidazo[1,5-*a*:1',5'-*d*]pyrazine-1,6-dicarboxamide (4a3)** Obtained as yellow solid; **Yield** 0.91 g, 87%; **M.p.** 244-246 °C (decomposed), **IR** (cm<sup>-1</sup>): 3334, 1693, 1276. This compound has been reported.<sup>2</sup>

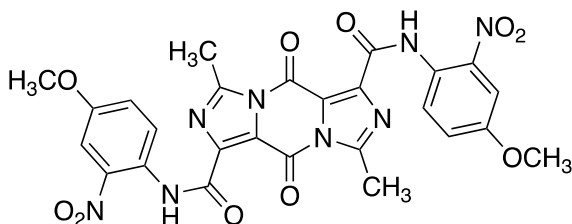

***N*<sup>1</sup>,*N*<sup>6</sup>-bis(4-methoxy-2-nitrophenyl)-3,8-dimethyl-5,10-dioxo-5*H*,10*H*-diimidazo[1,5-*a*:1',5'-*d*]pyrazine-1,6-dicarboxamide (4a4)** Obtained as yellow solid; **Yield** 1.08 g, 89%; **M.p.** 255-256 °C (decomposed); **IR** (cm<sup>-1</sup>): 3279, 1694, 1261.

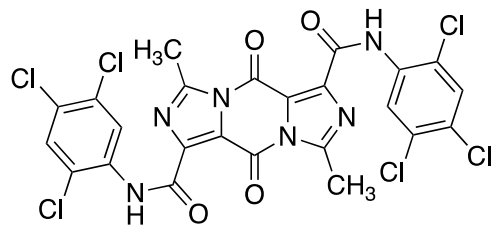

***N*<sup>1</sup>,*N*<sup>6</sup>-bis(2,4,5-trichlorophenyl)-3,8-dimethyl-5,10-dioxo-5*H*,10*H*-diimidazo[1,5-*a*:1',5'-*d*]pyrazine-1,6-dicarboxamide (4a5)**. Obtained as yellow solid; **Yield** 0.96 g, 73%; **M.p.** 255-256 °C; **IR** (cm<sup>-1</sup>): 3265, 1687, 1250. This compound has been reported.<sup>2</sup>

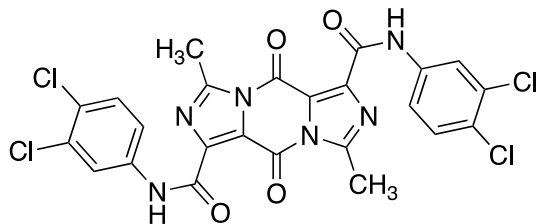

*N*<sup>1</sup>,*N*<sup>6</sup>-bis(3,4-dichlorophenyl)-3,8-dimethyl-

**5,10-dioxo-5*H*,10*H*-diimidazo[1,5-*a*:1',5'-*d*]pyrazine-1,6-dicarboxamide (4a6).**

Obtained as yellow solid; **Yield** 1.03 g, 87%; **M.p.** 244-245 °C, **IR** (cm<sup>-1</sup>): 3251, 1674, 1286. This compound has been reported.<sup>2</sup>

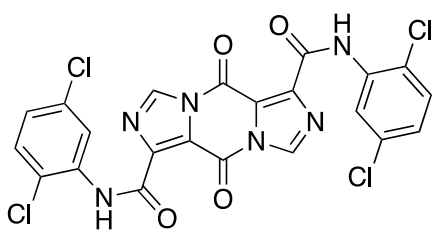

*N*<sup>1</sup>,*N*<sup>6</sup>-bis(2,5-dichlorophenyl)-5,10-dioxo-5*H*,10*H*-

**diimidazo[1,5-*a*:1',5'-*d*]pyrazine-1,6-dicarboxamide (4b1)** Obtained as yellow solid, **Yield** 0.95

g, 84%; **M.p.** 258-260 °C; **IR** (cm<sup>-1</sup>): 3323, 1693, 1240.

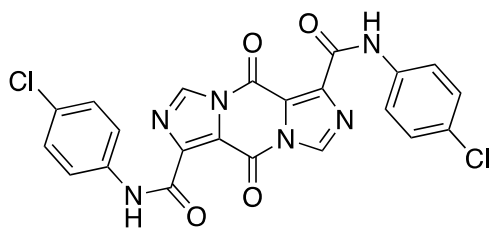

*N*<sup>1</sup>,*N*<sup>6</sup>-bis(4-chlorophenyl)-5,10-dioxo-5*H*,10*H*-

**diimidazo[1,5-*a*:1',5'-*d*]pyrazine-1,6-dicarboxamide (4b2)** Obtained as red solid; **Yield** 0.83 g,

84%; **M.p.** 251-253 °C (decomposed); **IR** (cm<sup>-1</sup>): 3256, 1678, 1253. This compound has been reported.<sup>4</sup>

<sup>4</sup> E. M. Perchellet, J.-P. Perchellet and P. W. Baures, *Journal of medicinal chemistry*, 2005, **48**, 5955-5965.

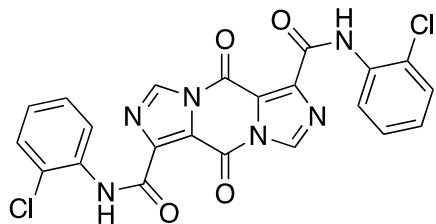

*N*<sup>1</sup>,*N*<sup>6</sup>-bis(2-chlorophenyl)-5,10-dioxo-5*H*,10*H*-

diimidazo[1,5-*a*:1',5'-*d*]pyrazine-1,6-dicarboxamide (**4b3**) Obtained as yellow solid; Yield 0.72 g, 73%; **M.p.** 259-257 °C (decomposed); **IR** (cm<sup>-1</sup>): 3343, 1693, 1240.

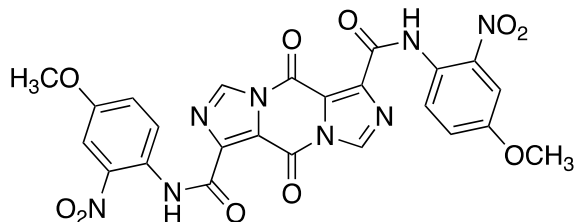

*N*<sup>1</sup>,*N*<sup>6</sup>-bis(4-methoxy-2-nitrophenyl)-5,10-dioxo-

5*H*,10*H*-diimidazo[1,5-*a*:1',5'-*d*]pyrazine-1,6-dicarboxamide (**4b4**) Obtained as yellow solid; Yield 0.83 g, 72%; **M.p.** 255-256 °C (decomposed); **IR** (cm<sup>-1</sup>): 3265, 1688, 1252.

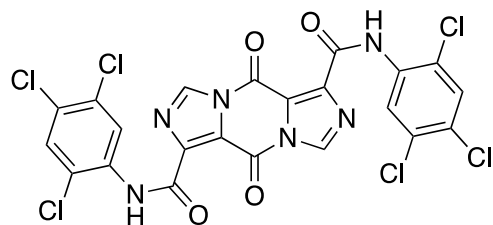

*N*<sup>1</sup>,*N*<sup>6</sup>-bis(2,4,5-trichlorophenyl)-5,10-dioxo-5*H*,10*H*-

diimidazo[1,5-*a*:1',5'-*d*]pyrazine-1,6-dicarboxamide (**4b5**) Obtained as yellow solid; Yield 0.95 g, 75%; **M.p.** 255-257 °C (decomposed); **IR** (cm<sup>-1</sup>): 3219, 1674, 1242.

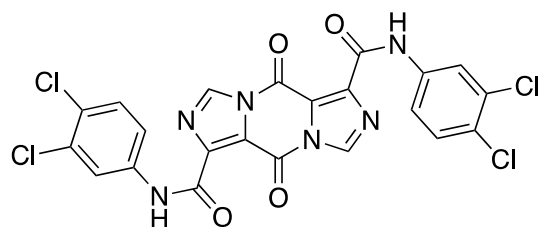

*N*<sup>1</sup>,*N*<sup>6</sup>-bis(3,4-dichlorophenyl)-5,10-dioxo-5*H*,10*H*-

diimidazo[1,5-*a*:1',5'-*d*]pyrazine-1,6-dicarboxamide (**4b6**) Obtained as orange solid; Yield 0.95 g, 84%; **M.p.** 256-257 °C (decomposed); **IR** (cm<sup>-1</sup>): 3302, 1686, 1254. This compound has been reported.<sup>4</sup>

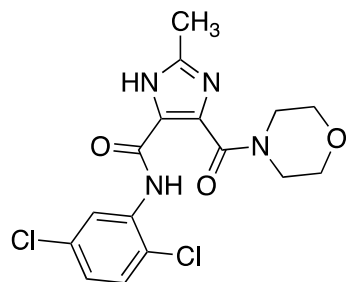

***N*-(2,5-dichlorophenyl)-2-methyl-4-(morpholine-4-carbonyl)-1*H*-imidazole-5-carboxamide (5a1)** Obtained as white solid; **Yield** 0.35 g, 46%; **M.p.** 227-229 °C; **IR** (cm<sup>-1</sup>): 3238, 1653, 1288; **<sup>1</sup>H-NMR** (500 MHz, CDCl<sub>3</sub> with 0.05% v/v TMS) δ (ppm): 12.48 (s, 1H), 11.48 (s, 1H), 8.28 (d, 1H, <sup>4</sup>*J* = 2.5 Hz), 7.35 (d, 1H, *J* = 9.0 Hz), 7.09 (dd, 1H, <sup>3</sup>*J* = 9.0 Hz, <sup>4</sup>*J* = 2.5 Hz), 4.28 (t, *J* = 5.0 Hz), 3.84-3.78 (m, 4H), 3.76 (t, *J* = 5.0 Hz), 2.44 (s, 3H); **<sup>13</sup>C-NMR** (125 MHz, CDCl<sub>3</sub> with 0.05% v/v TMS) δ (ppm): 163.84, 158.07, 145.40, 135.99, 134.87, 132.57, 130.44, 129.38, 125.52, 124.12, 124.03, 67.29, 66.93, 48.34, 43.57, 14.06. NMR data matched with the literature.<sup>2</sup>

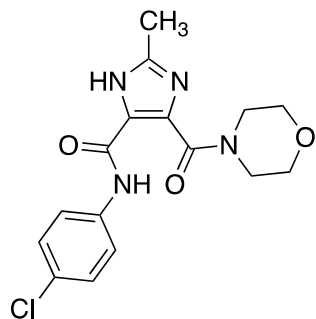

***N*-(4-chlorophenyl)-2-methyl-4-(morpholine-4-carbonyl)-1*H*-imidazole-5-carboxamide (5a2)** Obtained as white solid; **Yield** 0.19 g, 27%; **M.p.** 279-281 °C ; **IR** (cm<sup>-1</sup>): 3203, 1654, 1263; **<sup>1</sup>H-NMR** (500 MHz, CDCl<sub>3</sub> with 0.05% v/v TMS) δ (ppm): 12.79 (s, 1H), 11.38 (s, 1H), 7.70 (d, 1H, *J* = 9 Hz), 7.31 (d, 1H, *J* = 9.0 Hz), 4.32 (t, 2H, *J* = 5.0 Hz, CH<sub>2</sub>-N), 3.84-3.80 (m, 4H, CH<sub>2</sub>-O), 3.76 (t, 2H, *J* = 5.0 Hz, CH<sub>2</sub>-N), 2.43 (s, 3H, CH<sub>3</sub>); **<sup>13</sup>C-NMR** (125 MHz, CDCl<sub>3</sub> with 0.05% v/v TMS) δ (ppm): 164.36, 157.30, 144.65, 136.80, 133.81, 130.55, 129.37, 128.96, 121.60, 67.27, 66.87, 48.54, 43.72, 14.11; **HRMS-ESI**: C<sub>15</sub>H<sub>15</sub>ClN<sub>4</sub>O<sub>3</sub> *m/z* [M+H]<sup>+</sup> 349.1067 (Calcd.), 349.1082 (found).



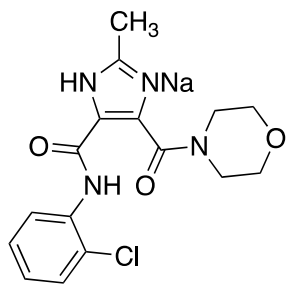

***N*-(2-chlorophenyl)-2-methyl-4-(morpholine-4-carbonyl)-1*H*-**

**imidazole-5-carboxamide (5a3).** Obtained as white solid; **Yield** 0.17 g, 24%; **M.p.** 223-225 °C, **IR** (cm<sup>-1</sup>): 3242, 1653, 1285; **<sup>1</sup>H-NMR** (500 MHz, CDCl<sub>3</sub> with 0.05% v/v TMS) δ (ppm): 12.26 (s, 1H), 11.50 (s, 1H), 8.12 (dd, 1H, <sup>3</sup>*J* = 8.0 Hz, <sup>4</sup>*J* = 1.5 Hz), 7.44 (dd, 1H, <sup>3</sup>*J* = 8.0 Hz, <sup>4</sup>*J* = 1.5 Hz), 7.27 (td, 1H, <sup>3</sup>*J* = 7.5 Hz, <sup>4</sup>*J* = 1.5 Hz), 7.12 (td, <sup>3</sup>*J* = 7.5 Hz, <sup>4</sup>*J* = 1.5 Hz), 4.26 (t, 2H, *J* = 5.0 Hz), 3.84-3.78 (m, 4H), 3.75 (t, 2H, *J* = 5.0 Hz), 2.36 (s, 3H); **<sup>13</sup>C-NMR** (125 MHz, DMSO-*d*<sub>6</sub>) δ (ppm): 163.69, 160.32, 159.50, 157.10, 145.52, 144.96, 134.91, 134.60, 133.95, 130.83, 129.58, 129.27, 128.78, 127.87, 127.49, 127.03, 125.63, 124.81, 124.31, 124.04, 122.82, 122.43, 66.48, 66.16, 66.07, 65.82, 47.80, 46.90, 42.96, 41.93, 13.50. NMR data matched with the literature.<sup>2</sup>

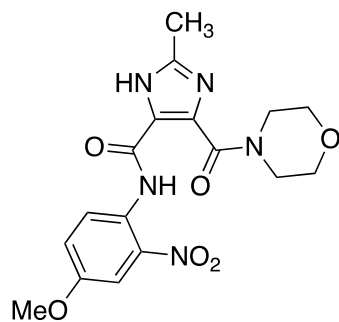

***N*-(4-methoxy-2-nitrophenyl)-2-methyl-4-(morpholine-4-**

**carbonyl)-1*H*-imidazole-5-carboxamide (5a4)** Obtained as yellow solid; **Yield** 0.15 g, 19%; **M.p.** 282-284 °C; **IR** (cm<sup>-1</sup>): 3219, 1664, 1255; **<sup>1</sup>H-NMR** (500 MHz, DMSO-*d*<sub>6</sub>) δ (ppm): 13.13 (s, 0.4H), 12.96 (s, 0.6H), 12.31 (s, 0.4H), 11.12 (s, 0.6H), 8.42 (d, 0.6H, *J* = 9.0 Hz), 7.65 (d, 0.4H, *J* = 9.0 Hz), 7.63 (d, 0.6H, *J* = 3.0 Hz), 7.54 (d, 0.4H, *J* = 3.0 Hz), 7.41 (dd, 0.6H, <sup>3</sup>*J* = 9.0 Hz, <sup>4</sup>*J* = 5.0 Hz), 7.35 (dd, 0.4H, <sup>3</sup>*J* = 9.0 Hz, <sup>4</sup>*J* = 5.0 Hz), 4.15 (t, 0.7H, *J* = 5.0 Hz), 4.04 (m, 0.8H), 3.86 (m, 3H), 3.70 (s, 1.3H), 3.67-3.64 (m, 3.2H), 3.54 (t, 1.2H, *J* = 5.0 Hz), 3.31 (s, 0.8H), 2.37-2.33 (m, 3H); **<sup>13</sup>C-NMR** (150 MHz, DMSO-*d*<sub>6</sub>) δ (ppm): 160.56, 160.30, 159.94, 159.72, 156.33, 154.70, 145.50, 144.84, 138.80, 138.48, 134.16, 130.80, 128.27, 127.58, 127.35, 126.82, 124.29, 123.21, 122.21, 120.28, 109.10, 108.83, 66.43, 66.06, 66.01, 65.77, 59.67, 55.90, 47.85,

46.80, 43.04, 41.86, 13.5; **HRMS-ESI:** C<sub>17</sub>H<sub>19</sub>N<sub>5</sub>O<sub>6</sub> *m/z* [M+H]<sup>+</sup> 390.1335 (Calcd.), 390.1388 (found).

There were two conformers of this compound: intrahydrogen bonding conformer and non-intrahydrogen bonding conformer.<sup>4</sup>

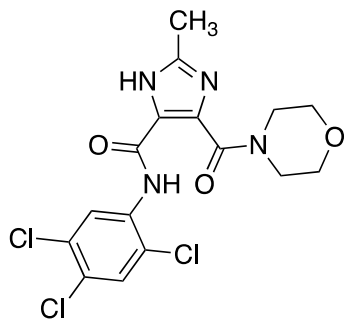

***N*-(2,4,5-trichlorophenyl)-2-methyl-4-(morpholine-4-carbonyl)-1*H*-imidazole-5-carboxamide (5a5).** Obtained as white solid; **Yield** 0.32 g, 38%; **M.p.** 261-263 °C, **IR** (cm<sup>-1</sup>): 3342, 1645, 1288; **<sup>1</sup>H-NMR** (500 MHz, CDCl<sub>3</sub> with 0.05% v/v TMS) δ (ppm): 12.61 (s, 1H), 11.12 (s, 1H), 8.50 (s, 1H), 7.55 (s, 1H), 4.33 (t, 2H, *J* = 5.0 Hz), 3.84 (m, 4H), 3.79 (t, 2H, *J* = 5.0 Hz), 2.48 (s, 3H); **<sup>13</sup>C-NMR** (150 MHz, DMSO-*d*<sub>6</sub>) δ (ppm): 163.42, 157.26, 145.87, 135.24, 134.32, 130.54, 129.83, 128.45, 126.24, 123.67, 123.89, 66.40, 66.10, 47.75, 42.99, 13.51. NMR data matched with the literature.<sup>2</sup>

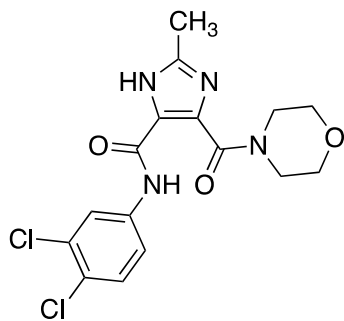

***N*-(3,4-dichlorophenyl)-2-methyl-4-(morpholine-4-carbonyl)-1*H*-imidazole-5-carboxamide (5a6).** Obtained as white solid; **Yield** 0.24 g, 31%; **M.p.** 261-263 °C, **IR** (cm<sup>-1</sup>): 3257, 1678, 1269; **<sup>1</sup>H-NMR** (600 MHz, DMSO-*d*<sub>6</sub>) δ (ppm): 13.09 (s, 1H), 12.85 (s, 0.7H), 10.26 (s, 0.3H), 8.07 (s, 1H), 7.61-7.50 (m, 2H), 4.18-3.63 (m, 8H), 2.35 (s, 3H); **<sup>13</sup>C-NMR** (150 MHz, DMSO-*d*<sub>6</sub>) 164.03, 160.61, 160.54, 156.83, 145.50, 144.64, 139.05, 138.47, 133.65, 131.33, 131.27, 131.02, 130.72, 130.34, 129.30, 127.42, 125.19, 124.64, 121.22, 120.39, 120.05, 119.39, 66.40, 66.10, 65.96, 65.93, 48.05, 42.26, 13.54, 13.45. NMR data matched with the literature.<sup>2</sup>

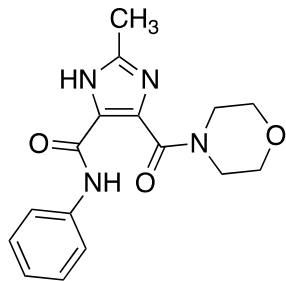

***N*-(phenyl)-2-methyl-4-(morpholine-4-carbonyl)-1*H*-imidazole-5-carboxamide (5a7).** Obtained as white solid; **Yield** 0.12 g, 19%; **M.p.** 265-267 °C, **IR** (cm<sup>-1</sup>): 3260, 1665, 1296; **<sup>1</sup>H-NMR** (600 MHz, DMSO-*d*<sub>6</sub> with 0.03% v/v TMS) δ (ppm): 13.07 (s, 0.8H), 12.82 (s, 0.2H), 12.47 (s, 0.8H), 9.81 (s, 0.2H), 7.79 (s, 0.4H), 7.63 (d, 7.61-7.50 (m, 2H), 4.18-3.63 (m, 8H), 2.35 (s, 3H); **<sup>13</sup>C-NMR** (600 MHz, DMSO-*d*<sub>6</sub> with 0.03% v/v TMS) 164.03, 160.61, 160.54, 156.83, 145.50, 144.64, 139.05, 138.47, 133.65, 131.33, 131.27, 131.02, 130.72, 130.34, 129.30, 127.42, 125.19, 124.64, 121.22, 120.39, 120.05, 119.39, 66.40, 66.10, 65.96, 65.93, 48.05, 42.26, 13.54, 13.45; **HRMS-ESI:** C<sub>16</sub>H<sub>18</sub>N<sub>4</sub>O<sub>3</sub> *m/z* [M+H]<sup>+</sup> 315.1452 (Calcd.), 315.1460 (found).

There were two conformers of this compound: intrahydrogen bonding conformer and non-intrahydrogen bonding conformer.<sup>4</sup>

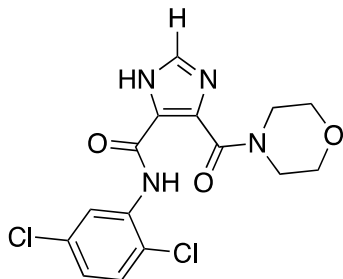

***N*-(2,5-dichlorophenyl)-4-(morpholine-4-carbonyl)-1*H*-imidazole-5-carboxamide (5b1)** Obtained as white solid; **Yield** 0.15 g, 20%; **M.p.** 223-225 °C; **IR** (cm<sup>-1</sup>): 3177, 1670, 1282; **<sup>1</sup>H-NMR** (600 MHz, DMSO-*d*<sub>6</sub>) δ (ppm): 13.48 (s, 1H), 12.28 (s, 0.6H), 9.78 (s, 0.4H), 8.36 (s, 1H), 7.95 (s, 1H), 7.57 (d, 1H, *J* = 8.4 Hz), 7.24 (dd, <sup>3</sup>*J* = 8.4 Hz, <sup>4</sup>*J* = 2.4 Hz), 4.11-3.67 (m, 8H); **<sup>13</sup>C-NMR** (125 MHz, DMSO-*d*<sub>6</sub> with 0.03% v/v TMS) δ (ppm): 162.42, 156.95, 149.97, 141.41, 136.95, 136.47, 135.90, 131.80, 130.76, 124.78, 121.98, 66.25, 65.96, 47.38, 42.49; **HRMS-ESI:** C<sub>15</sub>H<sub>14</sub>Cl<sub>2</sub>N<sub>4</sub>O<sub>3</sub> *m/z* [M+H]<sup>+</sup> 369.0521 (Calcd.), 369.0560 (found).

There were two conformers of this compound: intrahydrogen bonding conformer and non-intrahydrogen bonding conformer.<sup>4</sup>

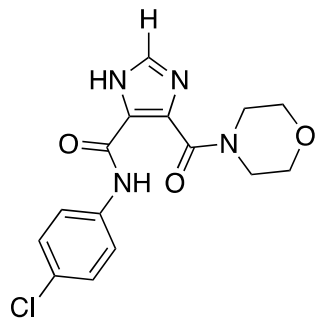

***N*-(4-chlorophenyl)-4-(morpholine-4-carbonyl)-1*H*-imidazole-5-**

**carboxamide (5b2)** Obtained as white solid; **Yield** 0.28 g, 42%; **M.p.** 251-253 °C; **IR** (cm<sup>-1</sup>): 3177, 1668, 1283; **<sup>1</sup>H-NMR** (600 MHz, DMSO-*d*<sub>6</sub> with 0.03% v/v TMS) δ (ppm): 13.49 (s, 0.7H), 13.20 (s, 0.3H), 12.62 (s, 0.7H), 10.13 (s, 0.3H), 7.92 (s, 1H), 7.68 (s, 1H), 7.43 (s, 1H), 4.15-3.65 (m, 8H); **<sup>13</sup>C-NMR** (125 MHz, DMSO-*d*<sub>6</sub> with 0.03% v/v TMS) δ (ppm): 164.05, 160.62, 160.26, 156.50, 137.23, 136.12, 133.67, 132.03, 129.67, 128.98, 128.57, 128.41, 127.38, 121.41, 120.83, 66.33, 66.04, 48.03, 43.19; **HRMS-ESI**: C<sub>15</sub>H<sub>15</sub>ClN<sub>4</sub>O<sub>3</sub> *m/z* [M+H]<sup>+</sup> 335.0910 (Calcd.), 335.0937 (found).

There were two conformers of this compound: intrahydrogen bonding conformer and non-intrahydrogen bonding conformer.<sup>4</sup>

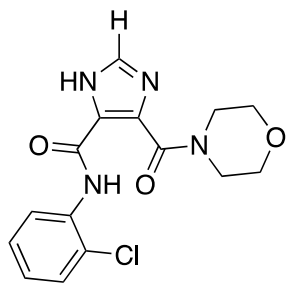

***N*-(2-chlorophenyl)-4-(morpholine-4-carbonyl)-1*H*-imidazole-5-**

**carboxamide (5b3)** Obtained as white solid; **Yield** 0.16 g, 24%; **M.p.** 187-189 °C; **IR** (cm<sup>-1</sup>): 3236, 1653, 1288; **<sup>1</sup>H-NMR** (600 MHz, DMSO-*d*<sub>6</sub>) δ (ppm): 13.45 (s, 1H), 12.06 (s, 0.6H), 9.74 (s, 0.4H), 8.18 (s, 1H), 7.93 (s, 1H), 7.53 (dd, 1H, <sup>3</sup>*J* = 7.8 Hz, <sup>4</sup>*J* = 1.2 Hz), 7.35 (td, 1H, <sup>3</sup>*J* = 7.8 Hz, <sup>4</sup>*J* = 1.2 Hz), 7.18 (t, 1H, <sup>3</sup>*J* = 7.8 Hz, <sup>4</sup>*J* = 1.2 Hz), 4.10-3.62 (m, 8H); **<sup>1</sup>H-NMR** (500 MHz, CDCl<sub>3</sub> with 0.05% v/v TMS) δ (ppm): 12.35 (s, 0.9H), 11.97 (s, 0.1H), 11.58 (s, 0.9H), 9.80 (s, 0.1H), 8.55 (d, 0.1H, *J* = 8.0 Hz), 8.19 (dd, 0.9H, <sup>3</sup>*J* = 8.0 Hz, <sup>4</sup>*J* = 1.5 Hz), 7.68 (s, 0.9H), 7.61 (s, 0.1H), 7.47 (dd, 0.9H, <sup>3</sup>*J* = 8.0 Hz, <sup>4</sup>*J* = 1.5 Hz), 7.43 (d, 0.1H, <sup>3</sup>*J* = 8.0 Hz), 7.32 (td, 1H, <sup>3</sup>*J* = 8.0 Hz, <sup>4</sup>*J* = 1.5 Hz), 7.15 (td, 0.9H, <sup>3</sup>*J* = 8.0 Hz, <sup>4</sup>*J* = 1.5 Hz), 7.01 (t, 0.1H, <sup>3</sup>*J* = 8.0 Hz), 4.30 (t, 1.8H, *J* = 5.0 Hz), 3.89-3.82 (m, 4H), 3.80 (t, 1.8H, *J* = 5.0 Hz), 3.76 (s, 0.2H), 3.63 (s, 0.2H); **<sup>13</sup>C-NMR** (125 MHz, DMSO-*d*<sub>6</sub> with 0.03% v/v TMS) δ (ppm): 163.59, 160.22, 159.37, 157.00, 136.37,

136.12, 134.75, 134.51, 134.22, 131.29, 129.54, 129.25, 128.96, 127.88, 127.45, 127.28, 125.72, 124.81, 124.35, 124.07, 122.76, 121.31, 66.44, 66.12, 65.98, 65.74, 47.81, 46.81, 42.98, 41.90;

**HRMS-ESI:** C<sub>15</sub>H<sub>15</sub>ClN<sub>4</sub>O<sub>3</sub> *m/z* [M+H]<sup>+</sup> 335.0910 (Calcd.), 335.0898 (found).

There were two conformers of this compound: intrahydrogen bonding conformer and non-intrahydrogen bonding conformer.<sup>4</sup>

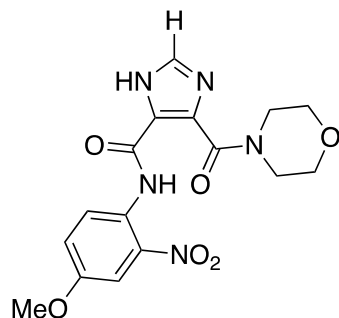

***N*-(4-methoxy-2-nitrophenyl)-4-(morpholine-4-carbonyl)-1*H*-**

**imidazole-5-carboxamide (5b4)** Obtained as yellow solid; **Yield** 0.29 g, 39%; **M.p.** 211-212 °C;

**IR** (cm<sup>-1</sup>): 3348, 1680, 1260; **<sup>1</sup>H-NMR** (600 MHz, DMSO-*d*<sub>6</sub>) δ (ppm): 13.31 (s, 1H), 12.24 (s, 0.3H), 11.24 (s, 0.7H), 8.45 (s, 1H), 7.93 (s, 1H), 7.62 (s, 1H), 7.40 (d, 1H, *J* = 9.0 Hz), 4.10-3.56 (m, 11H); **<sup>13</sup>C-NMR** (125 MHz, DMSO-*d*<sub>6</sub> with 0.03% v/v TMS) δ (ppm): 160.26, 159.90, 154.70, 138.59, 136.15, 131.32, 127.68, 126.91, 124.09, 122.36, 108.89, 65.97, 65.74, 55.92, 46.77, 41.88;

**HRMS-ESI:** C<sub>16</sub>H<sub>17</sub>N<sub>5</sub>O<sub>6</sub> [M+H]<sup>+</sup> 376.1257 (Calcd.), 376.1276 (found).

There were two conformers of this compound: intrahydrogen bonding conformer and non-intrahydrogen bonding conformer.<sup>4</sup>

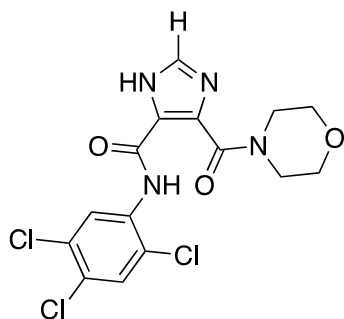

***N*-(2,4,5-trichlorophenyl)-4-(morpholine-4-carbonyl)-1*H*-**

**imidazole-5-carboxamide (5b5)** Obtained as white solid; **Yield** 0.32 g, 43%; **M.p.** 224-227 °C;

**IR** (cm<sup>-1</sup>): 3234, 1556, 1265; **<sup>1</sup>H-NMR** (600 MHz, DMSO-*d*<sub>6</sub> with 0.03% v/v TMS) δ (ppm): 13.55 (s, 0.6H), 12.37 (s, 0.4H), 12.43 (s, 0.6H), 9.79 (s, 0.4H), 8.55 (s, 1H), 7.97-7.94 (m, 2H), 4.14-3.54 (m, 8H); **<sup>13</sup>C-NMR** (125 MHz, DMSO-*d*<sub>6</sub> with 0.03% v/v TMS) δ (ppm): 163.34, 157.31,

136.63, 134.91, 134.57, 130.46, 130.04, 128.65, 126.36, 123.79, 123.11, 66.27, 65.99, 47.59, 43.02; **HRMS-ESI**: C<sub>15</sub>H<sub>13</sub>Cl<sub>3</sub>N<sub>4</sub>O<sub>3</sub> *m/z* [M-H]<sup>-</sup> 400.9975 (Calcd.), 400.9936 (found).

There were two conformers of this compound: intrahydrogen bonding conformer and non-intrahydrogen bonding conformer.<sup>4</sup>

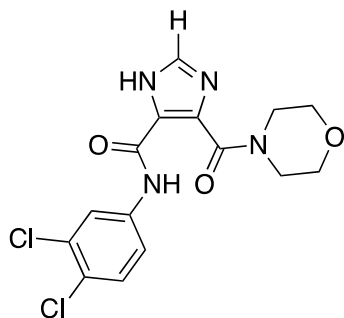

***N*-(3,4-dichlorophenyl)-4-(morpholine-4-carbonyl)-1*H*-imidazole-5-carboxamide (5b6)** Obtained as white solid, **Yield** 0.33 g, 45%; **M.p.** 258-261 °C; **IR** (cm<sup>-1</sup>): 3219, 1654, 1290; **<sup>1</sup>H-NMR** (600 MHz, DMSO-*d*<sub>6</sub>) δ (ppm): 13.46 (s, 1H), 12.78 (s, 0.54H), 10.33 (s, 0.45H), 8.10-7.59 (m, 4H), 4.14-3.62 (m, 8H); **<sup>13</sup>C-NMR** (125 MHz, DMSO-*d*<sub>6</sub> with 0.03% v/v TMS) δ (ppm): 163.99, 156.83, 138.33, 136.24, 133.98, 130.87, 129.38, 127.95, 125.19, 120.53, 119.51, 66.23, 65.97, 47.99, 43.25; **HRMS-ESI**: C<sub>15</sub>H<sub>14</sub>Cl<sub>2</sub>N<sub>4</sub>O<sub>3</sub> *m/z* [M-H]<sup>-</sup> 367.0365 (Calcd.), 367.0350 (found).

There were two conformers of this compound: intrahydrogen bonding conformer and non-intrahydrogen bonding conformer.<sup>4</sup>

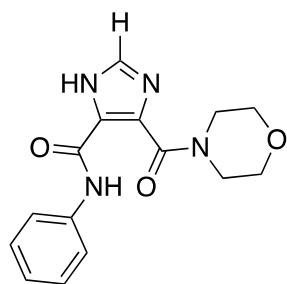

***N*-phenyl-4-(morpholine-4-carbonyl)-1*H*-imidazole-5-carboxamide (5b7)** Obtained as white solid, **Yield** 0.24 g, 40%; **M.p.** 235-237 °C; **IR** (cm<sup>-1</sup>): 3172, 1629, 1286; **<sup>1</sup>H-NMR** (600 MHz, DMSO-*d*<sub>6</sub>) δ (ppm): 13.46 (s, 0.75H), 13.15 (s, 0.25H), 12.45 (s, 0.75H), 9.91 (s, 0.25H), 7.92 (s, 0.75H), 7.89 (s, 0.25H), 7.81 (d, 0.5H, *J* = 7.8 Hz), 7.65 (d, 0.5H, *J* = 7.8 Hz), 7.39 (t, 1.5H, *J* = 15.6 Hz, *J* = 7.8 Hz), 7.32 (t, 0.5H, *J* = 15.6 Hz, *J* = 7.8 Hz), 7.13 (t, 0.75H, *J* = 15.6 Hz, *J* = 7.8 Hz), 7.07 (t, 0.25H, *J* = 15.6 Hz, *J* = 7.8 Hz), 4.14-3.66 (m, 8H); **<sup>13</sup>C-NMR** (125 MHz, DMSO-*d*<sub>6</sub>) δ (ppm): 164.14, 160.71, 160.10, 156.47, 138.64, 138.29, 136.03, 135.65,

133.52, 132.26, 129.89, 129.10, 128.54, 127.08, 123.88, 123.33, 119.92, 119.30, 66.42, 66.11, 48.04, 43.19; **HRMS-ESI:** C<sub>15</sub>H<sub>16</sub>N<sub>4</sub>O<sub>3</sub> *m/z* [M+H]<sup>+</sup> 301.1295 (Calcd.), 301.1275 (found).

There were two conformers of this compound: intrahydrogen bonding conformer and non-intrahydrogen bonding conformer.<sup>4</sup>

### *<sup>1</sup>H-NMR, <sup>13</sup>C-NMR and HRMS spectra of synthesized compounds*

#### *Compound 2b*

#### IR spectrum

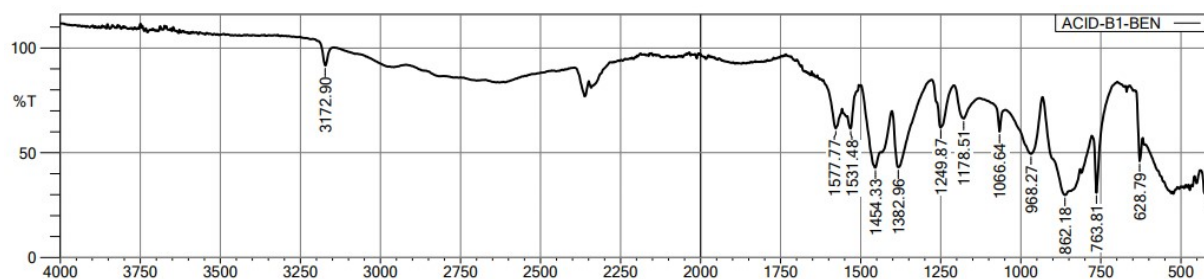

#### MS spectrum

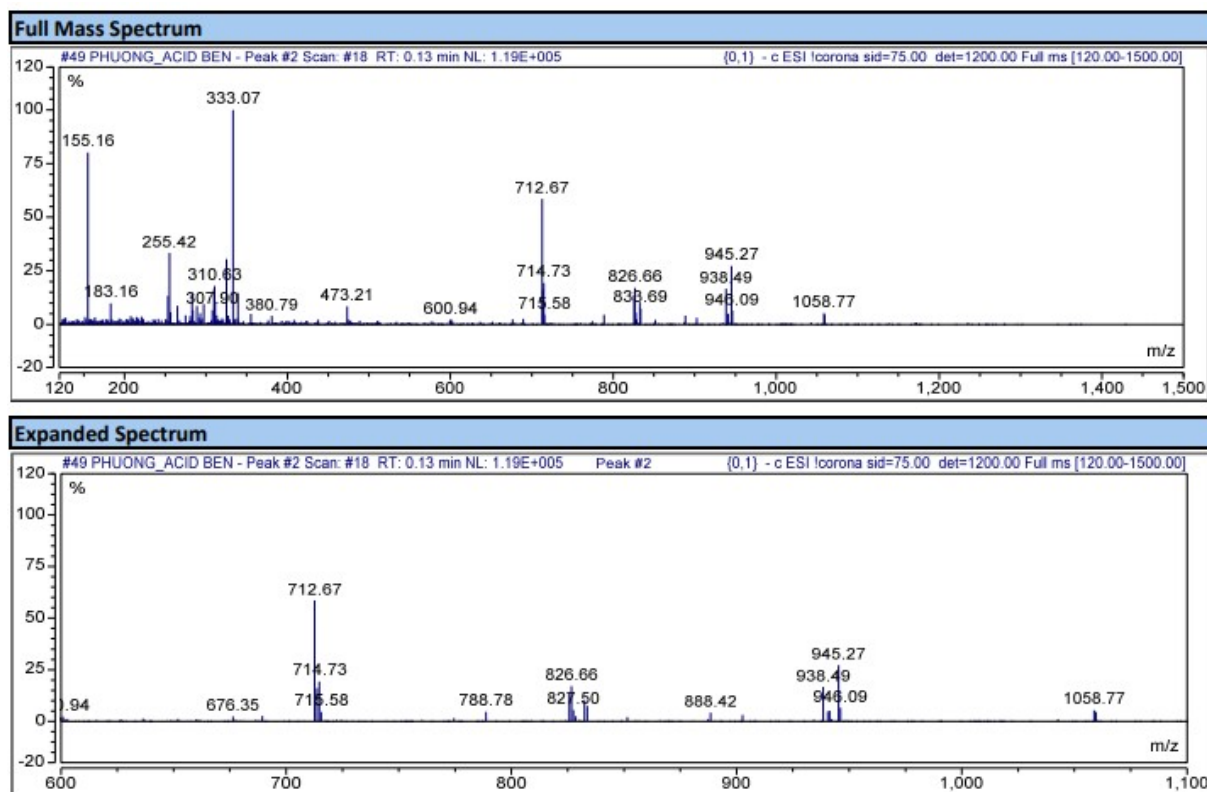

#### <sup>1</sup>H-NMR spectrum

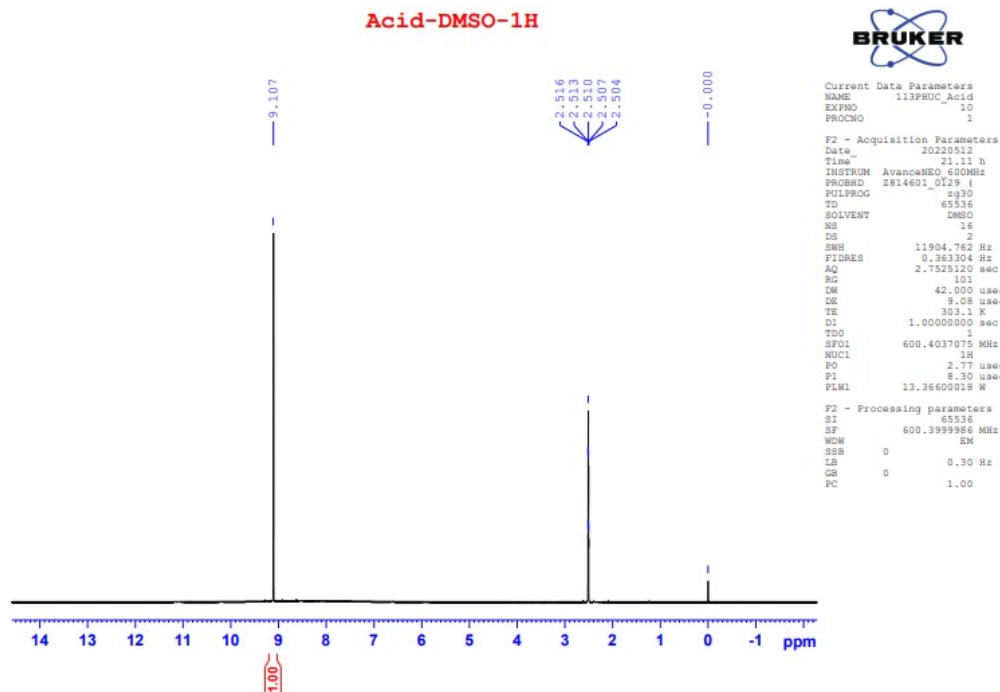

<sup>13</sup>C-NMR spectrum

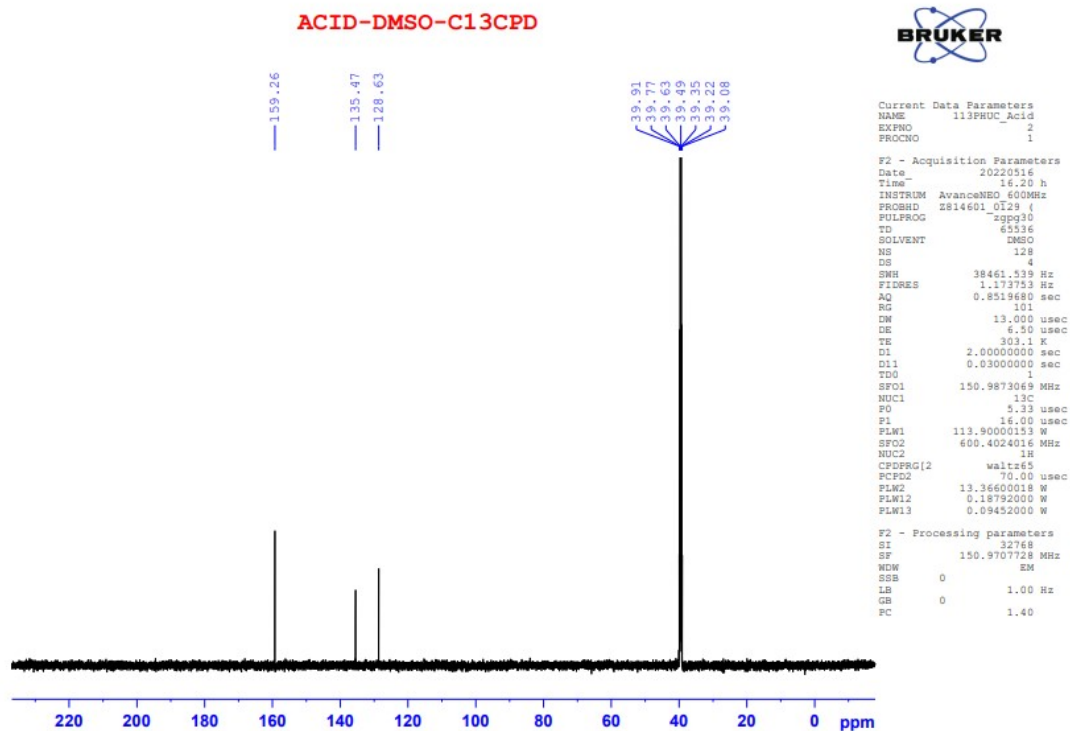

Compound **3b**

IR spectrum



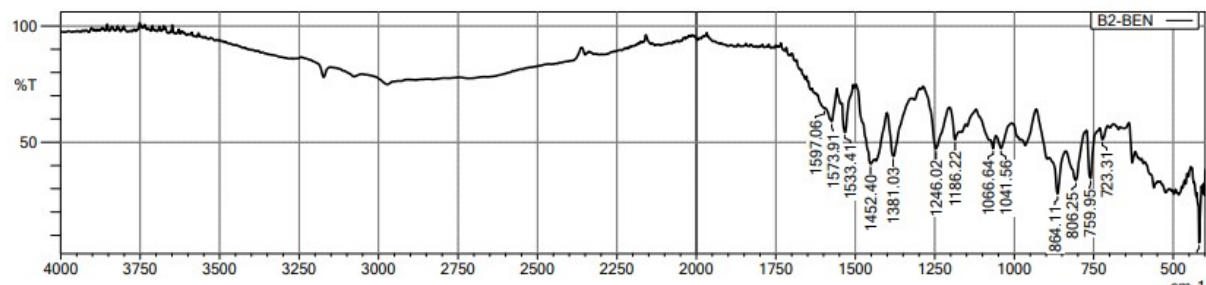

Compound 4a1

IR spectrum

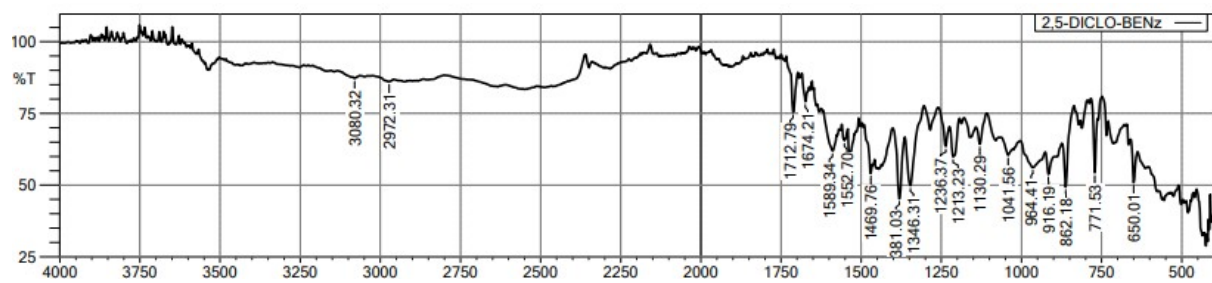

Compound 4a2

IR spectrum

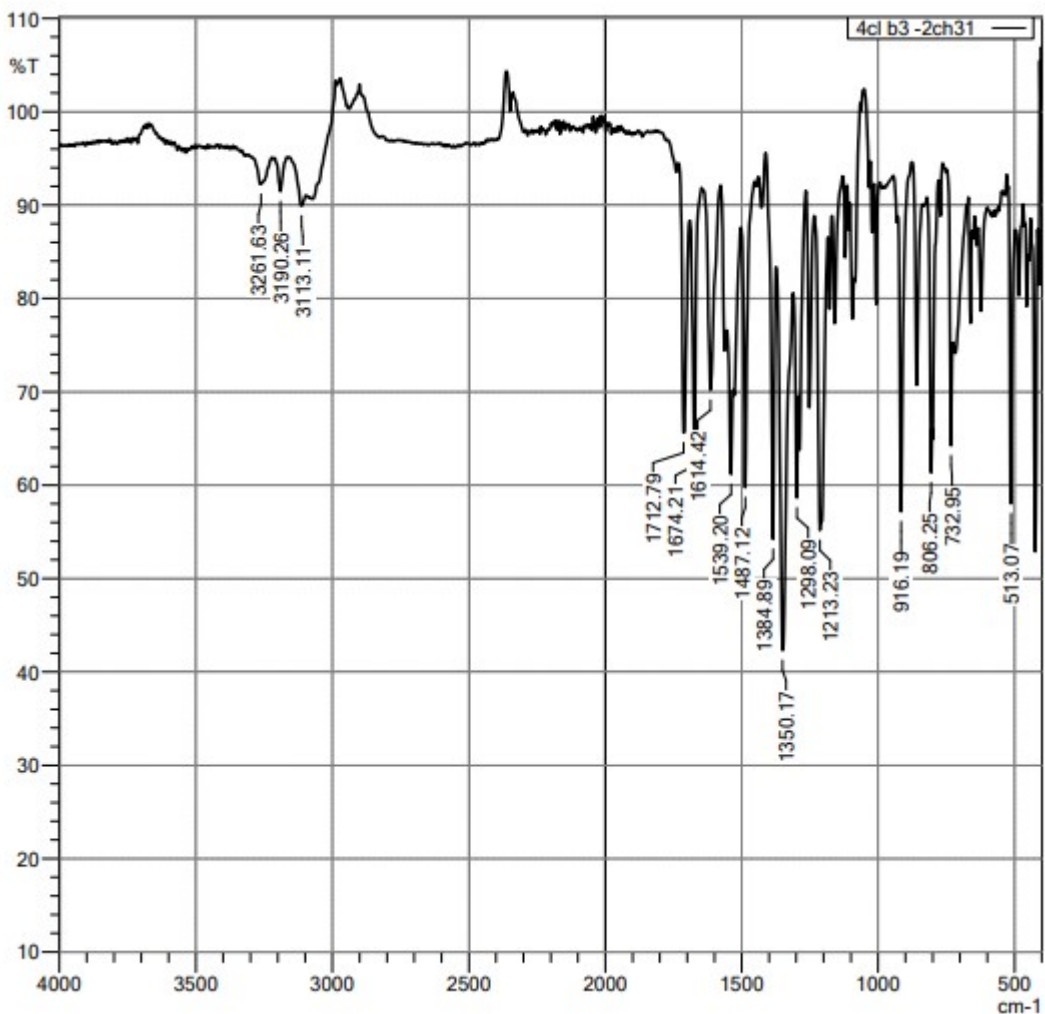

Compound **4a3**

IR spectrum

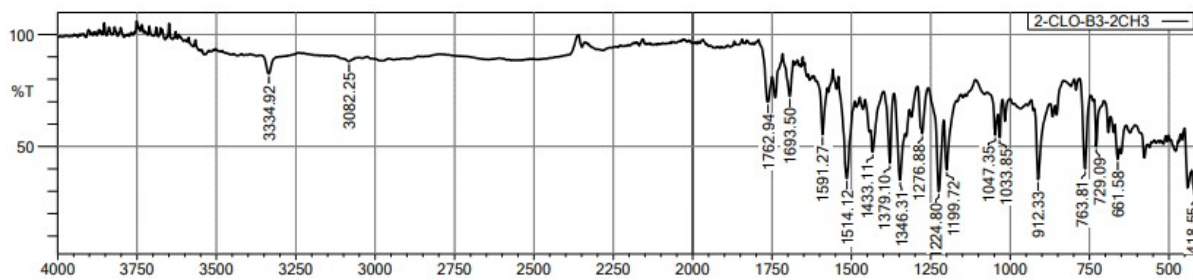

Compound **4a4**

IR spectrum

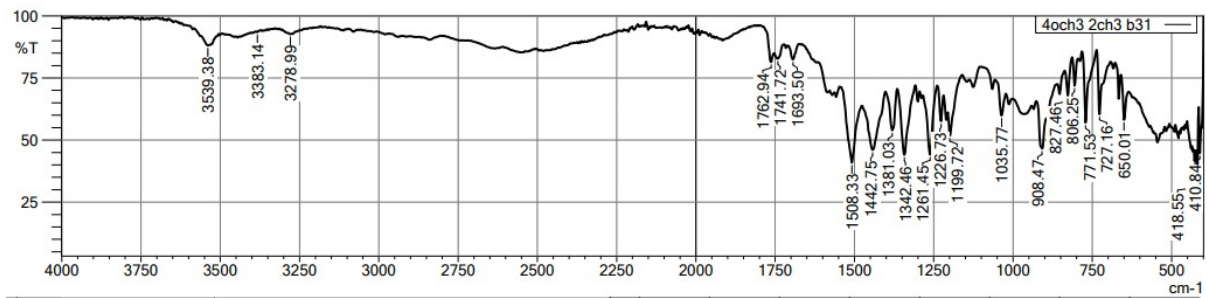

Compound 4a7

IR spectrum

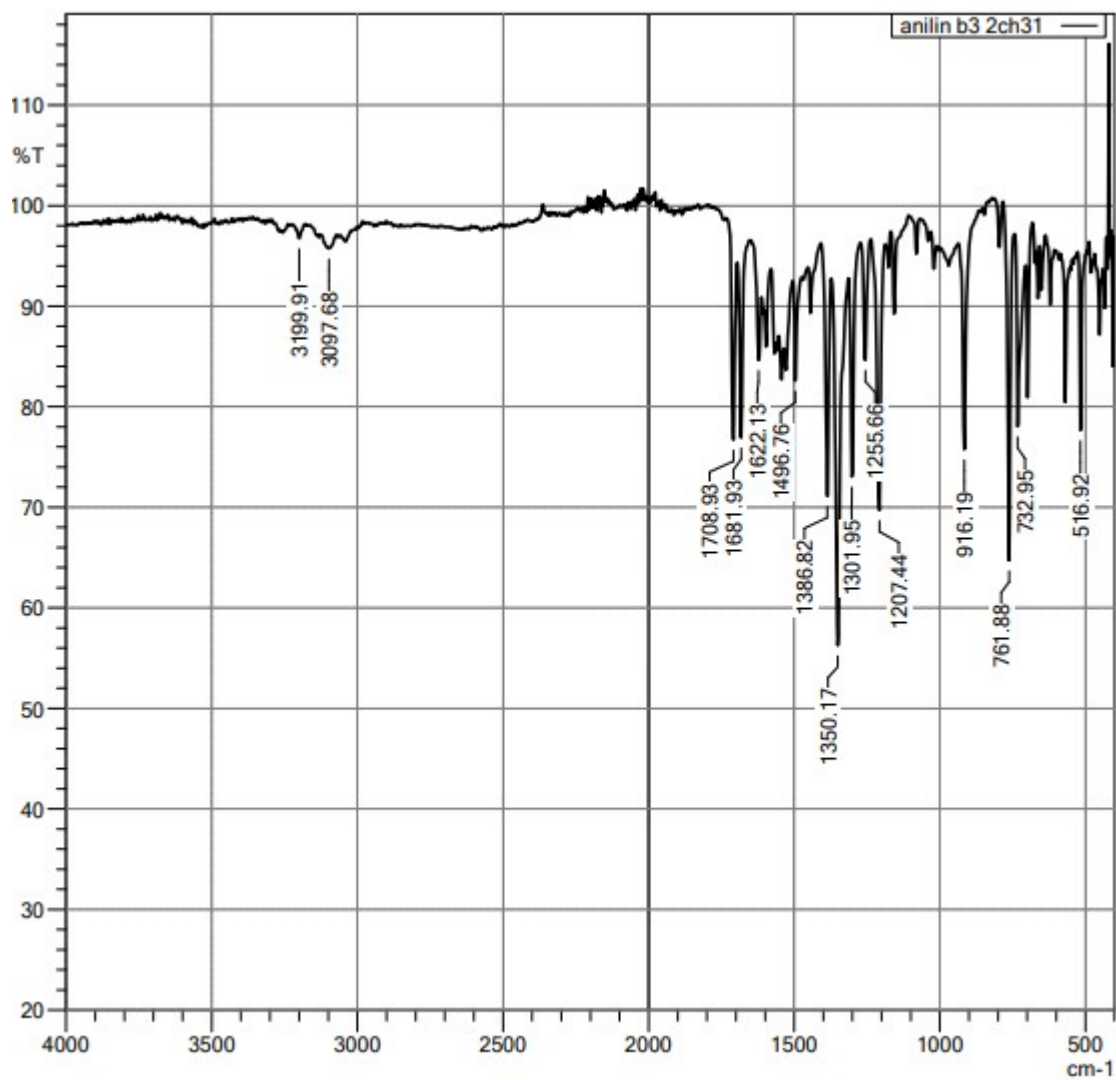

Compound 4b1

IR spectrum

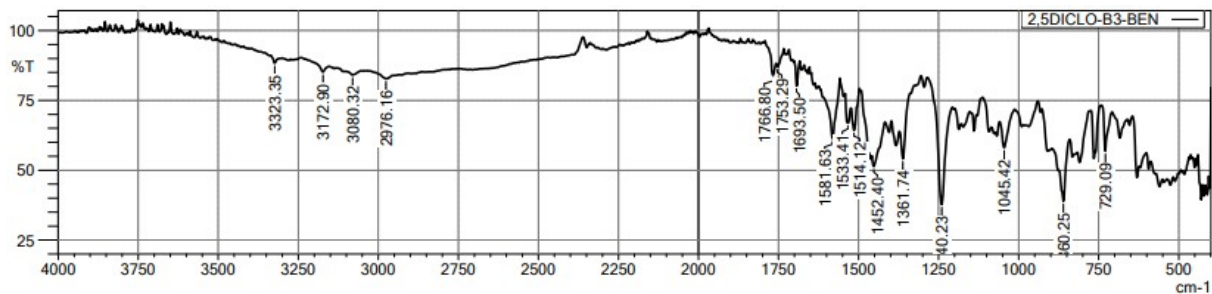

*Compound 4b2*

IR spectrum

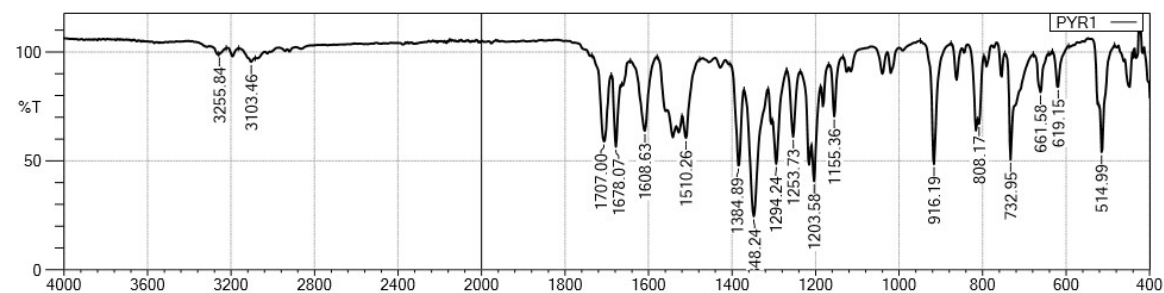

*Compound 4b4*

IR spectrum

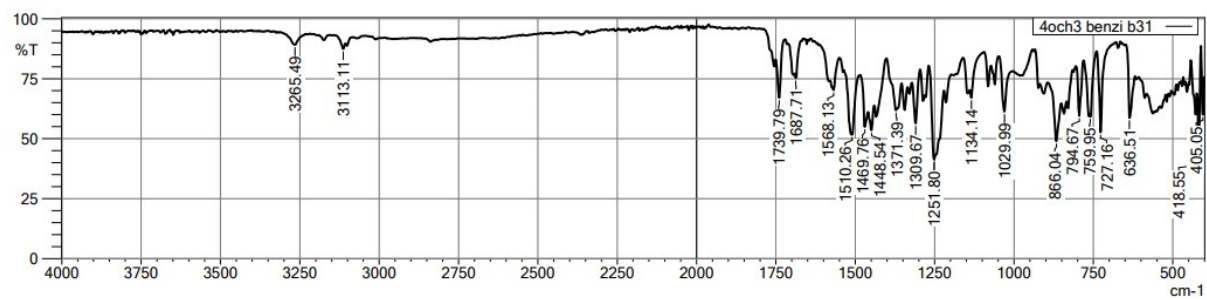

*Compound 5a1*

IR spectrum

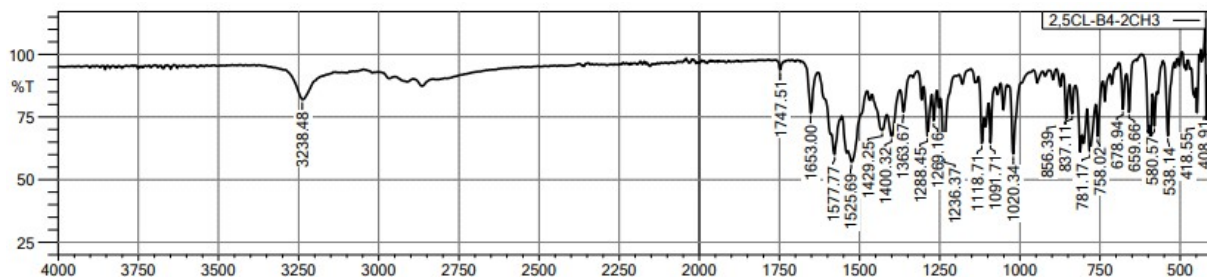

MS spectrum

MSMS: Precursor m/z ----- /+ Base Peak 483.06(2516862)

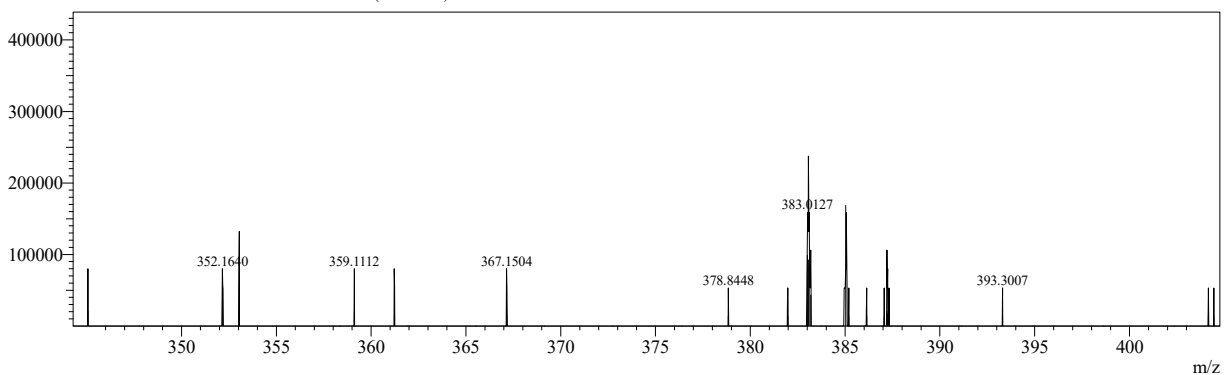

MSMS: Precursor m/z ----- /- Base Peak 495.04(1813182)

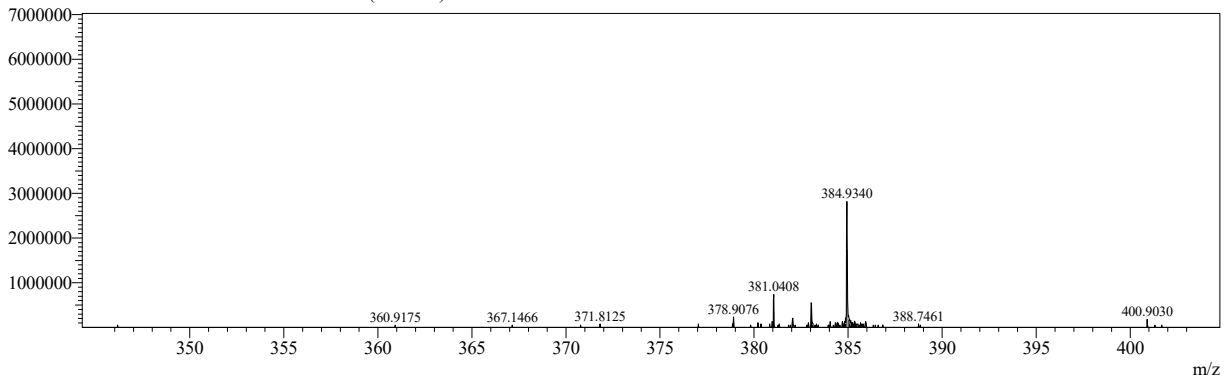

<sup>1</sup>H-NMR spectrum, 500 MHz, CDCl<sub>3</sub> with 0.05% v/v TMS (TMS peak was at 0 ppm)

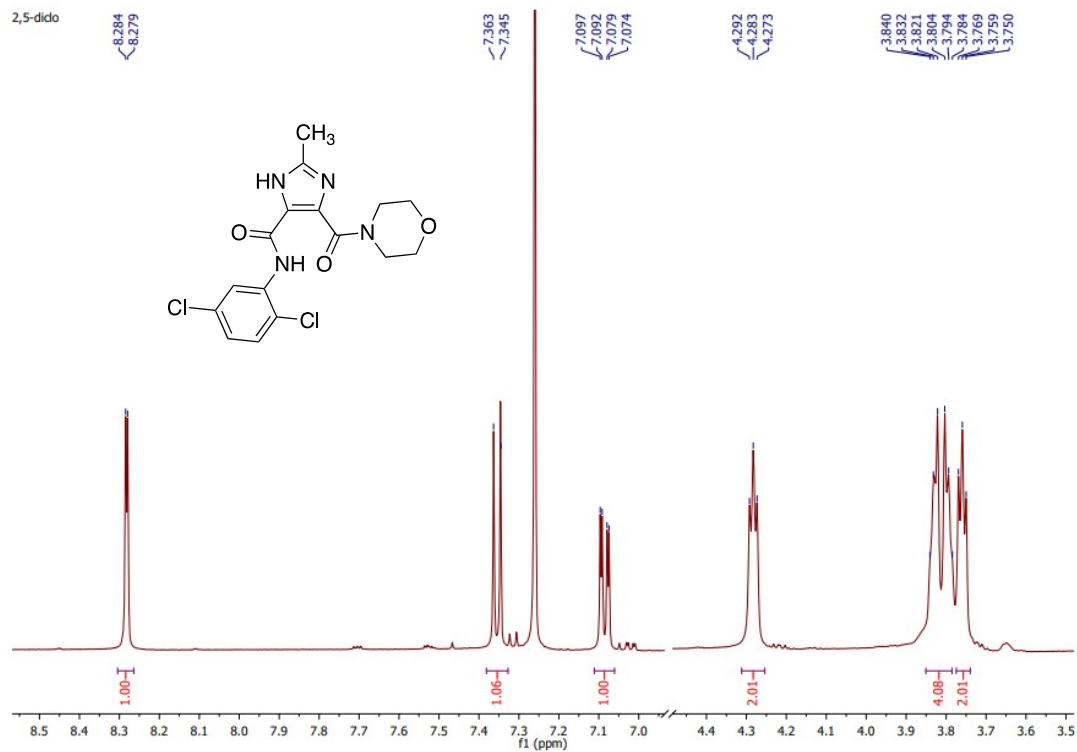

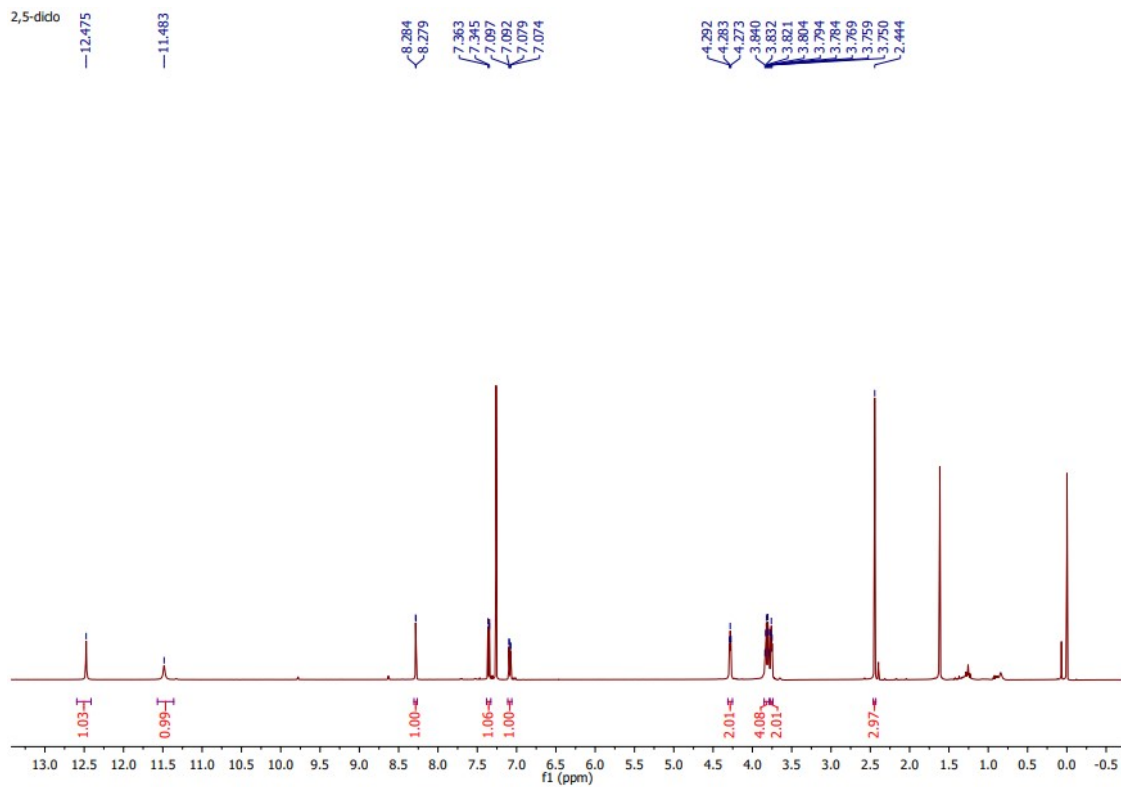

$^{13}\text{C}$ -NMR spectrum, 125 MHz,  $\text{CDCl}_3$  with 0.05% v/v TMS (TMS peak was at 0 ppm)

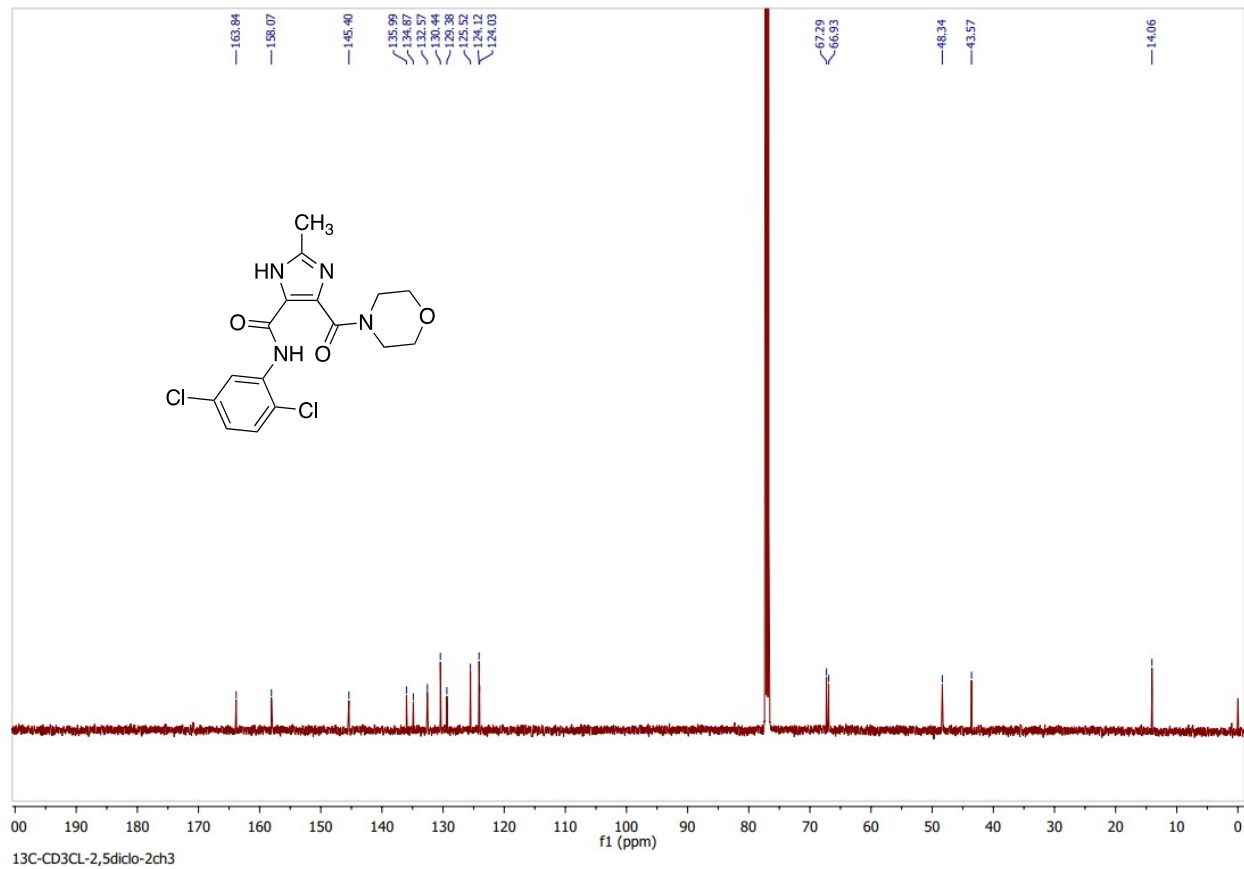

*Compound 5a2*

IR spectrum

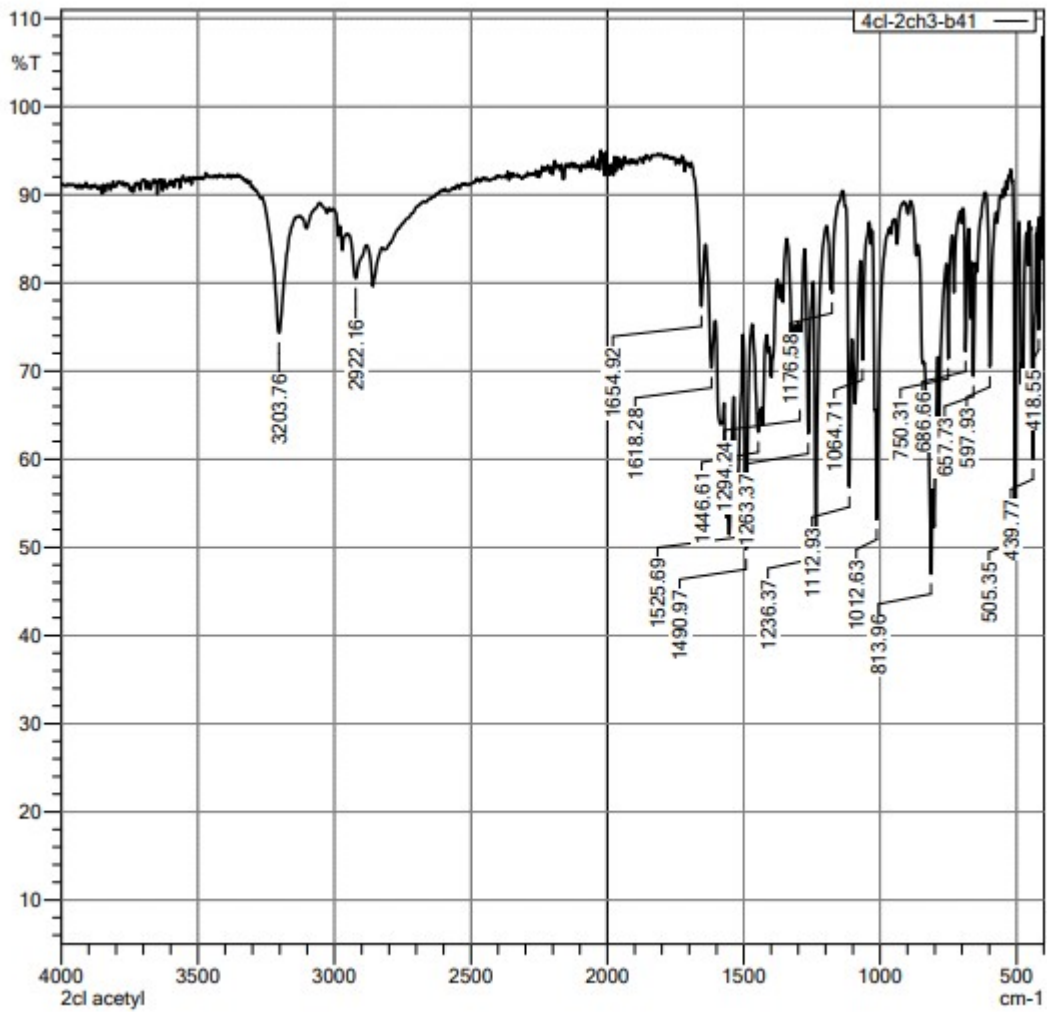

MS spectrum



MSMS: Precursor m/z ----- /+ Base Peak 179.03(274254)

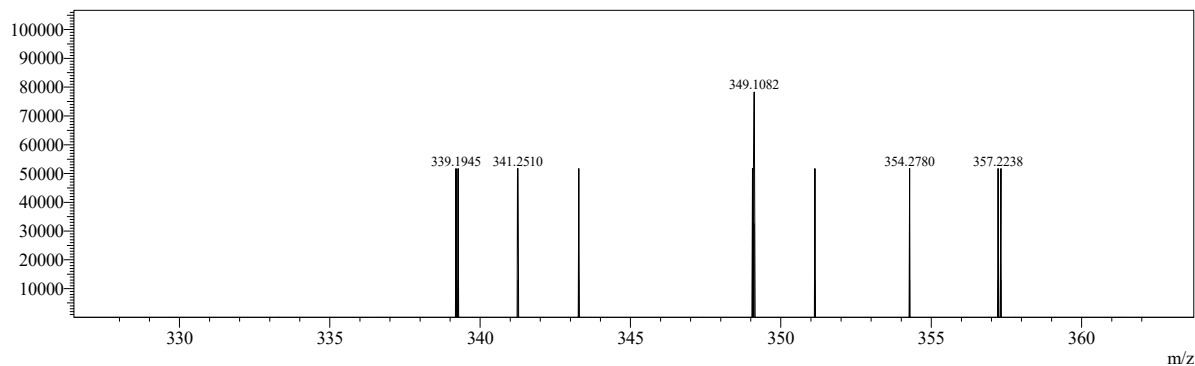

MSMS: Precursor m/z ----- /- Base Peak 226.97(997268)

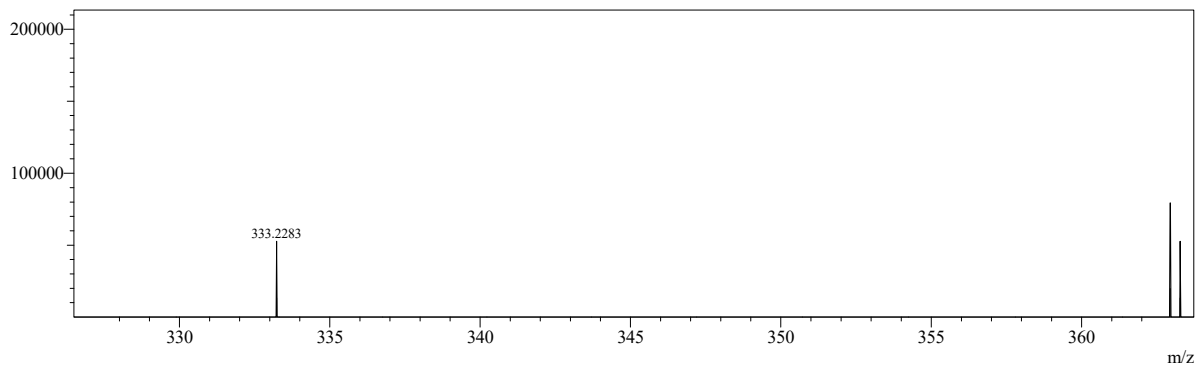

$^1\text{H-NMR}$  spectrum, 500 MHz,  $\text{CDCl}_3$  with 0.05% v/v TMS (TMS peak was at 0 ppm)

4cl-2ch3

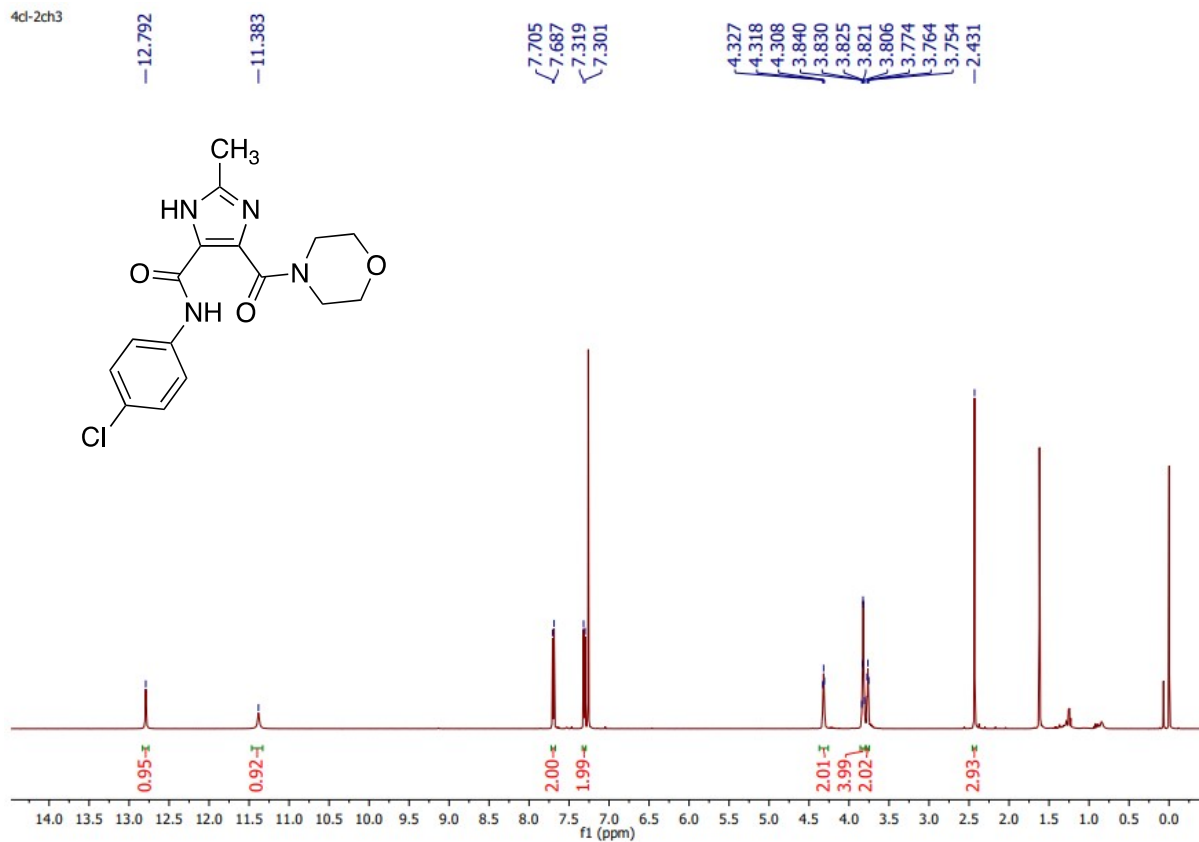

4cl-2ch3

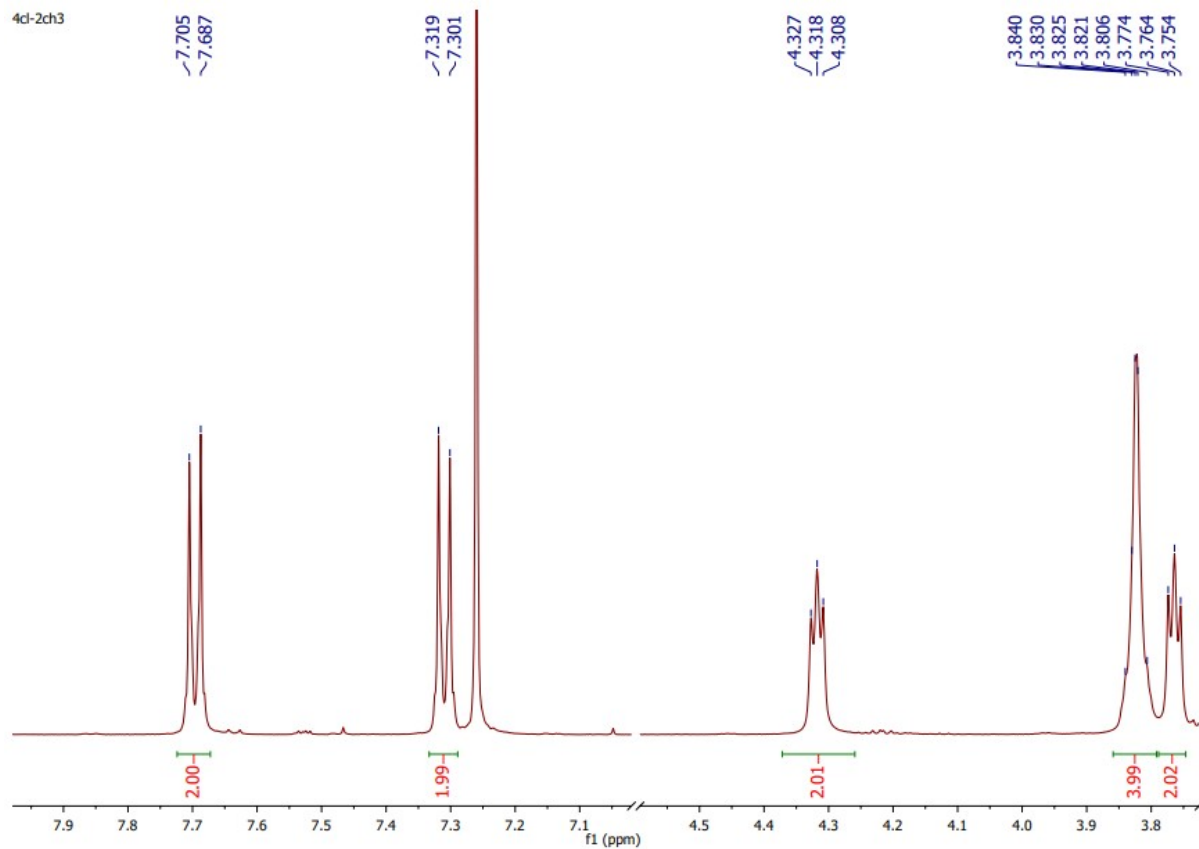

$^{13}\text{C}$ -NMR spectrum, 125 MHz,  $\text{CDCl}_3$  with 0.05% v/v TMS (TMS peak was at 0 ppm)

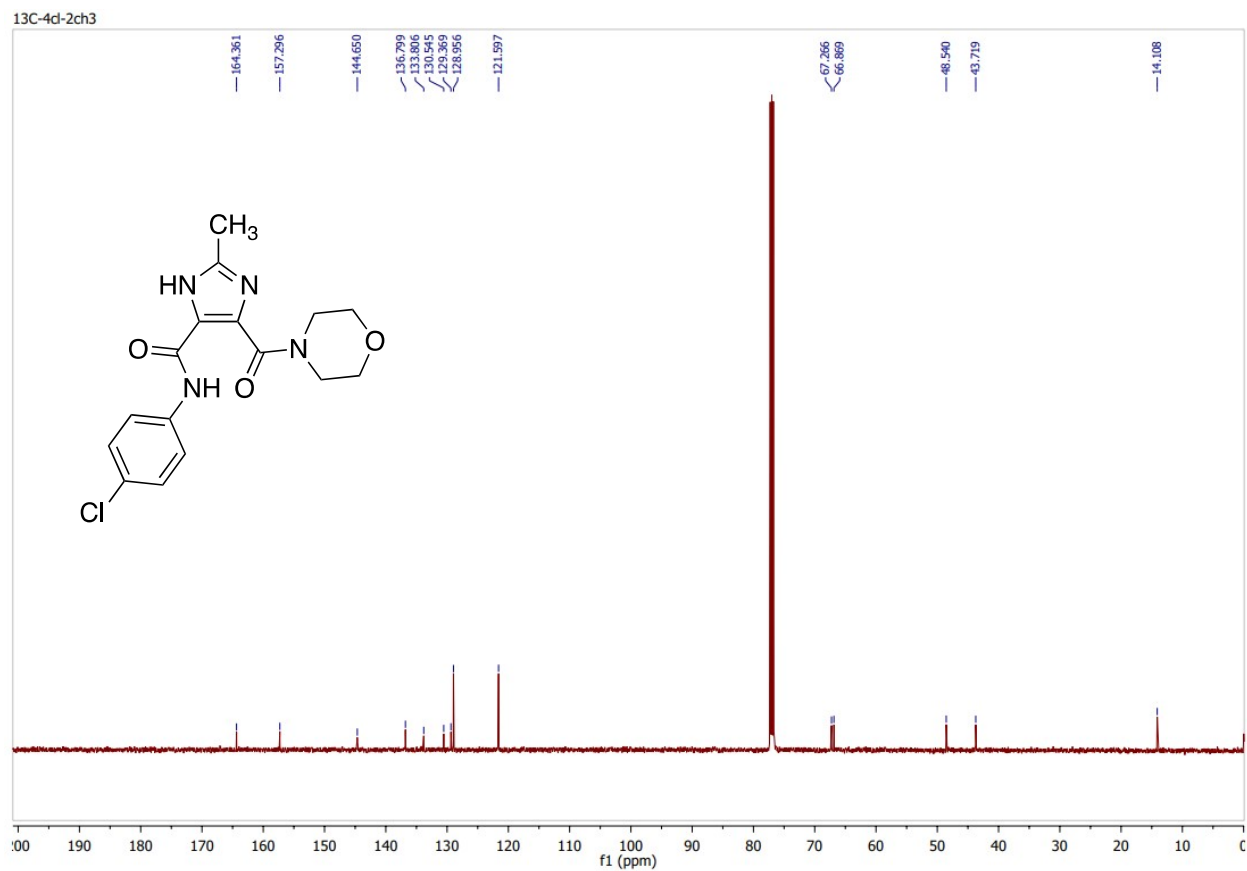

Compound 5a4

IR spectrum

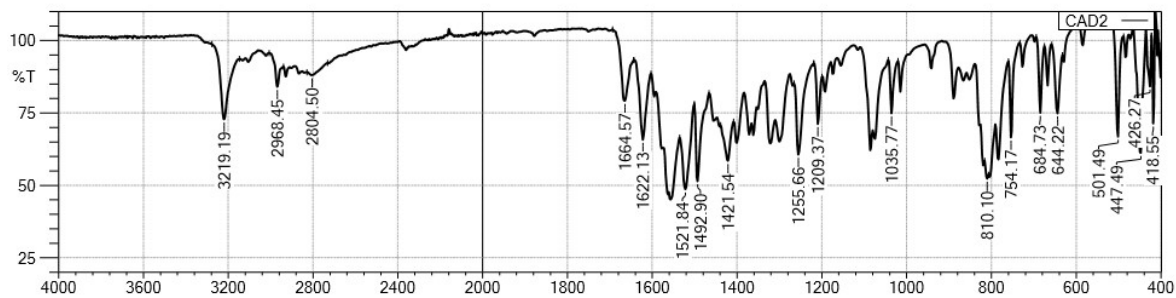

MS spectrum

MSMS: Precursor m/z ----- /+ Base Peak 412.11(9752159)

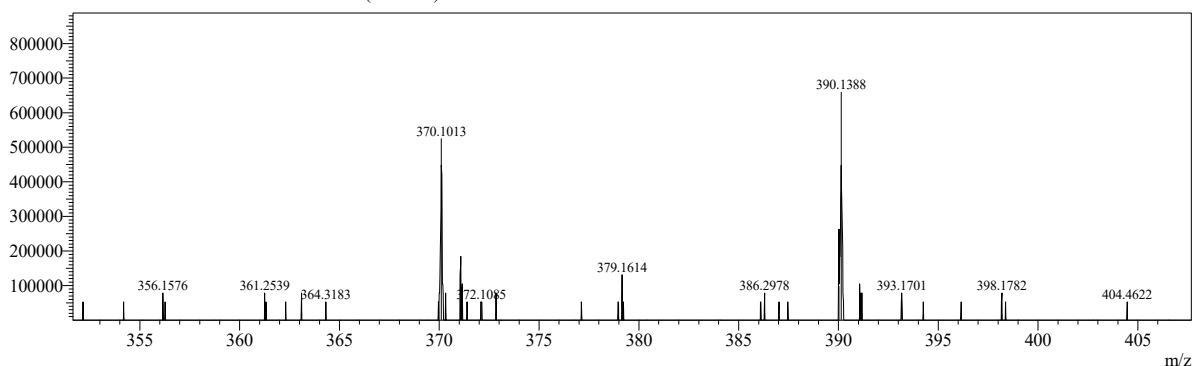

MSMS: Precursor m/z ----- /- Base Peak 388.12(2558526)

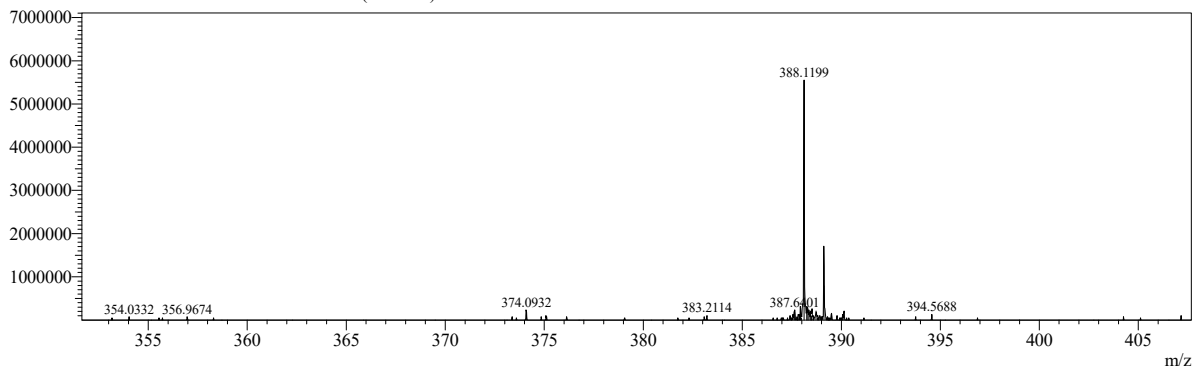

<sup>1</sup>H-NMR spectrum, 500 MHz, DMSO-d<sub>6</sub>

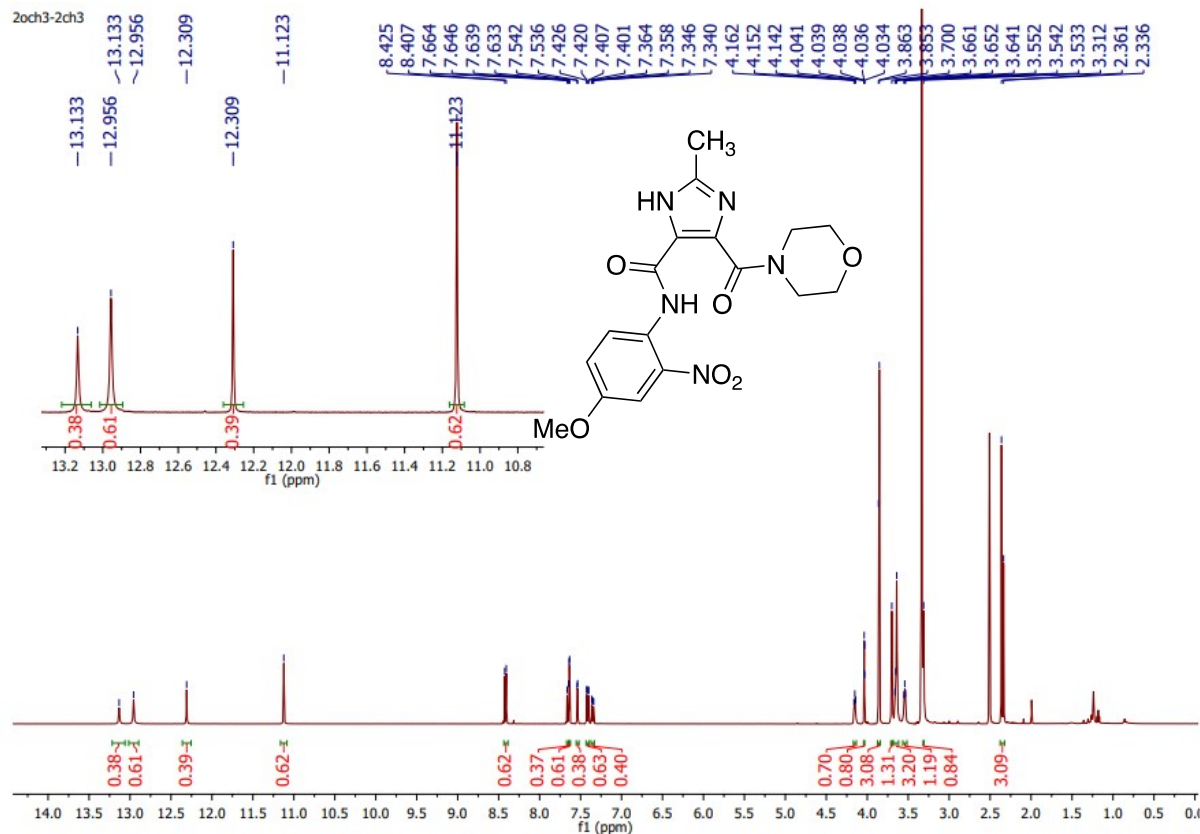

2och3-2ch3

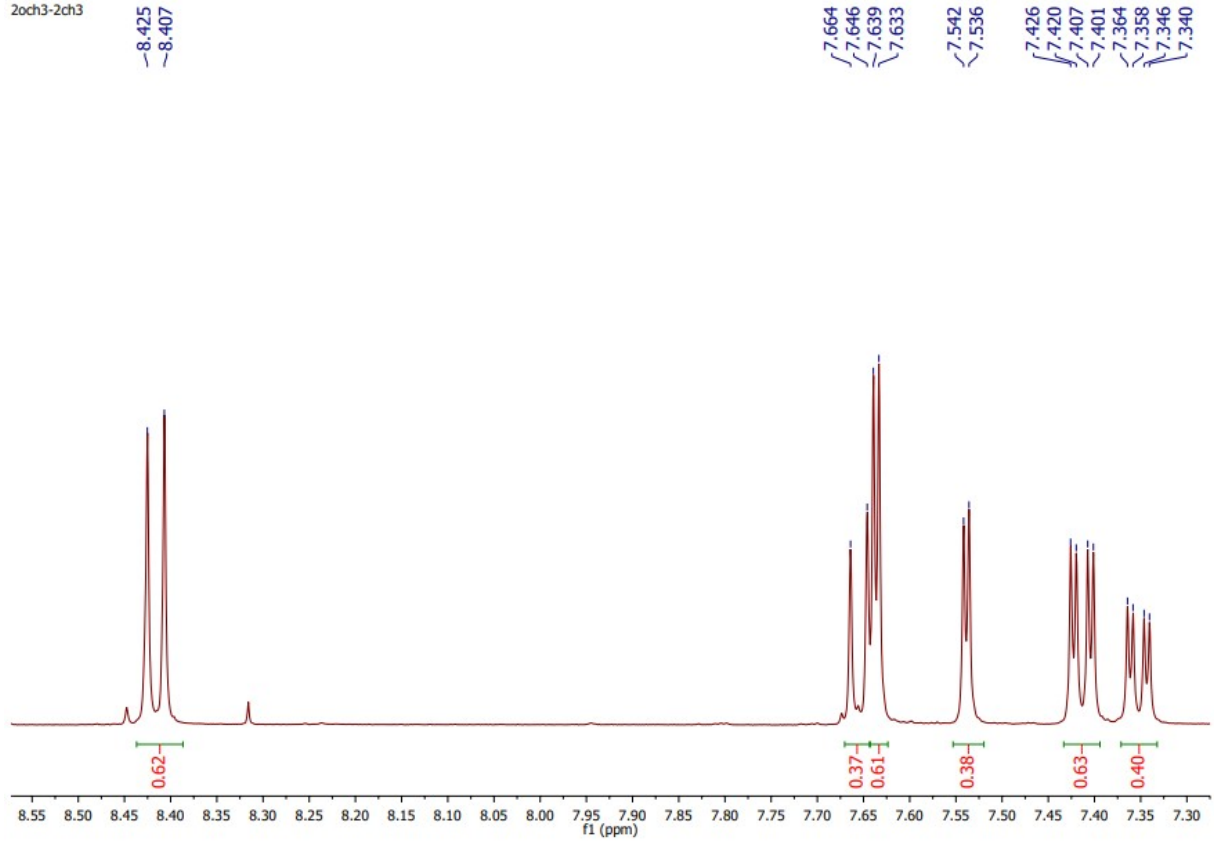

2och3-2ch3

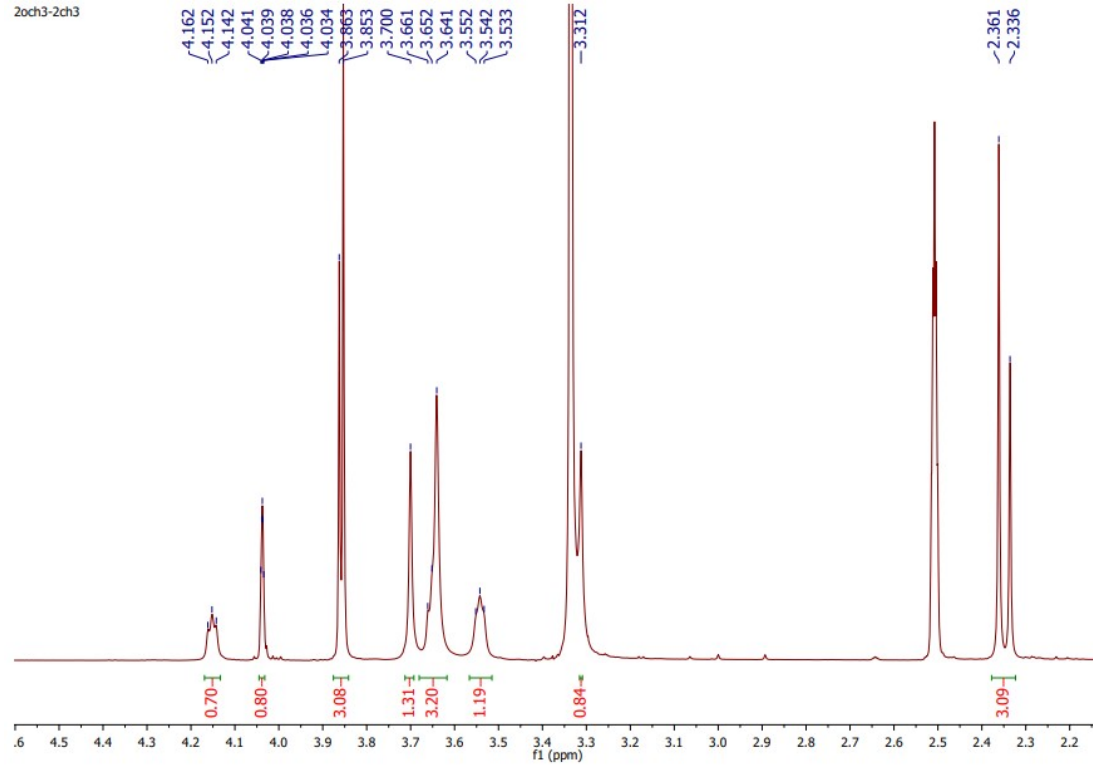

Compound **5a4** existed in the 2 conformers: the intramolecular hydrogen bonding and the non-intramolecular hydrogen bonding between 2 amide groups at approximate ratio of 4:6.

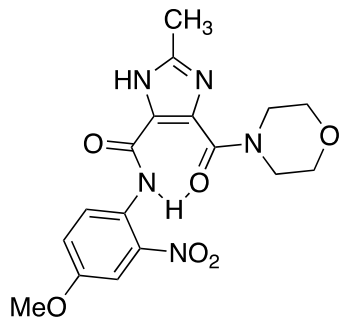

intrahydrogen bonding conformer

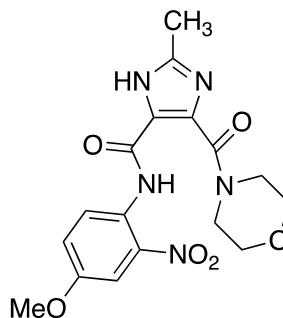

non-intrahydrogen bonding conformer

$^{13}\text{C}$ -NMR spectrum, 500 MHz,  $\text{DMSO-}d_6$

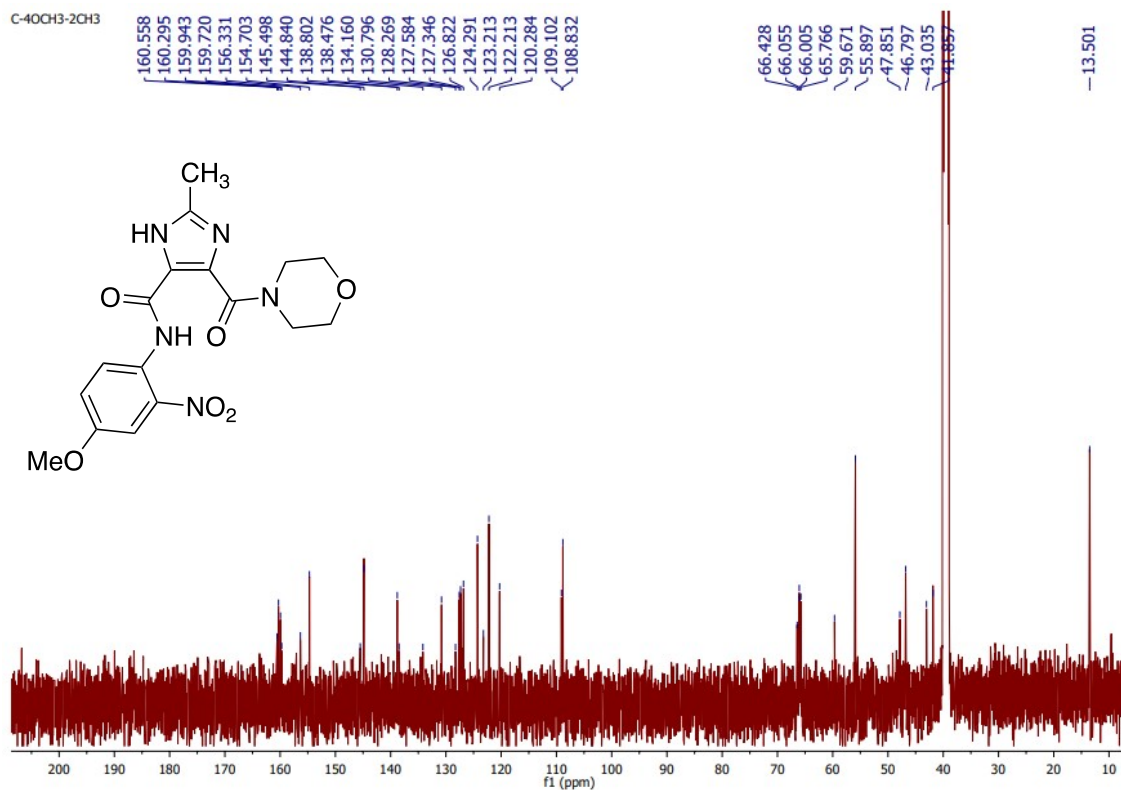

*Compound 5a7*

IR spectrum

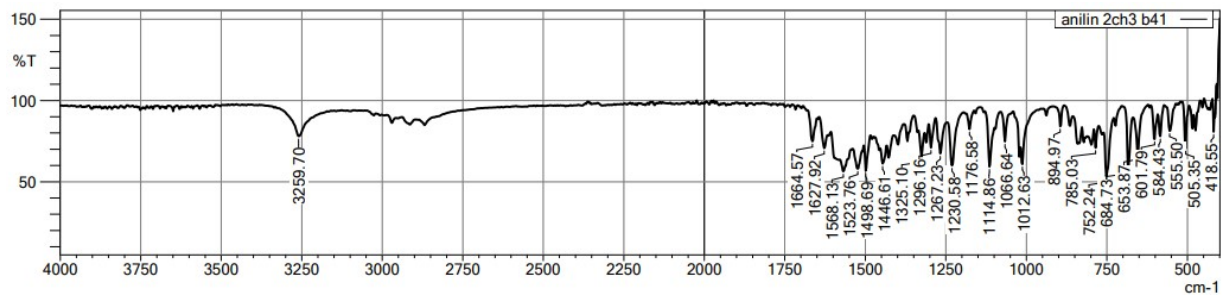

MS spectrum

MSMS: Precursor m/z ----- /+ Base Peak 315.15(6663364)

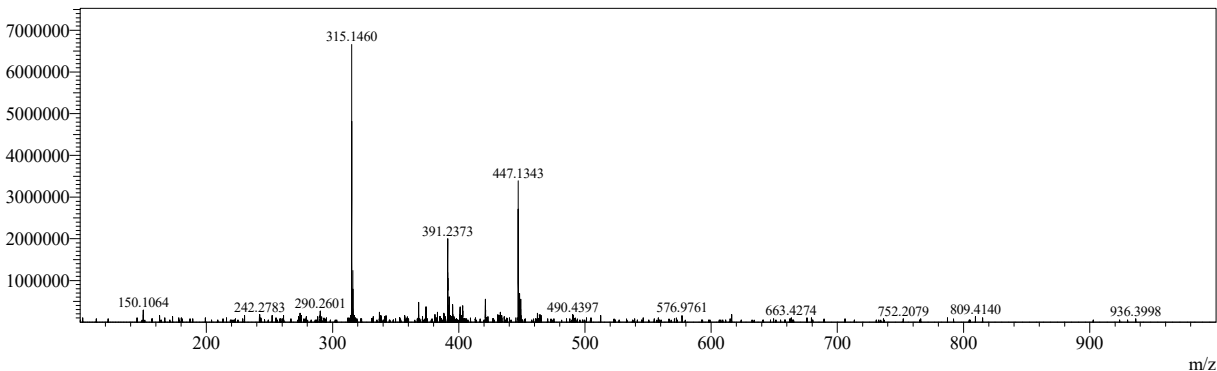

MSMS: Precursor m/z ----- /- Base Peak 194.93(5822783)

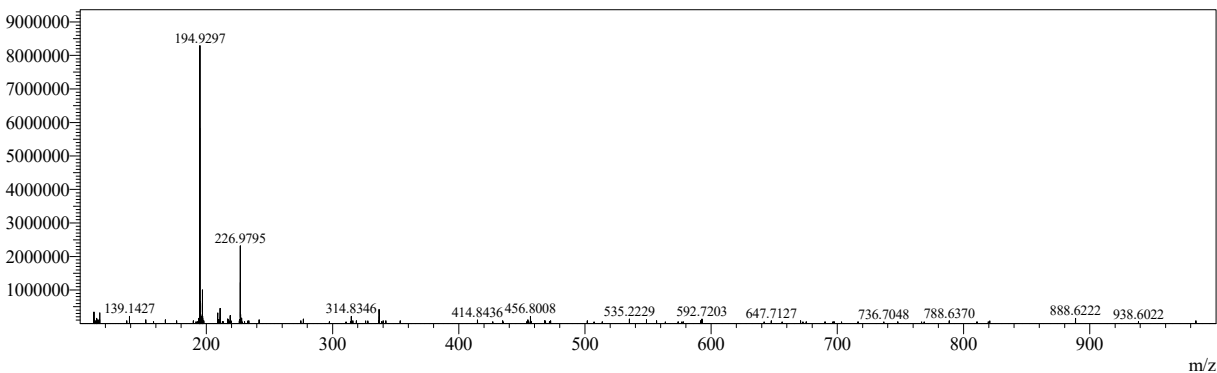

<sup>1</sup>H-NMR spectrum, 500 MHz, DMSO-d<sub>6</sub> with 0.03% v/v TMS (TMS peak was at 0 ppm)

anilin-2ch3

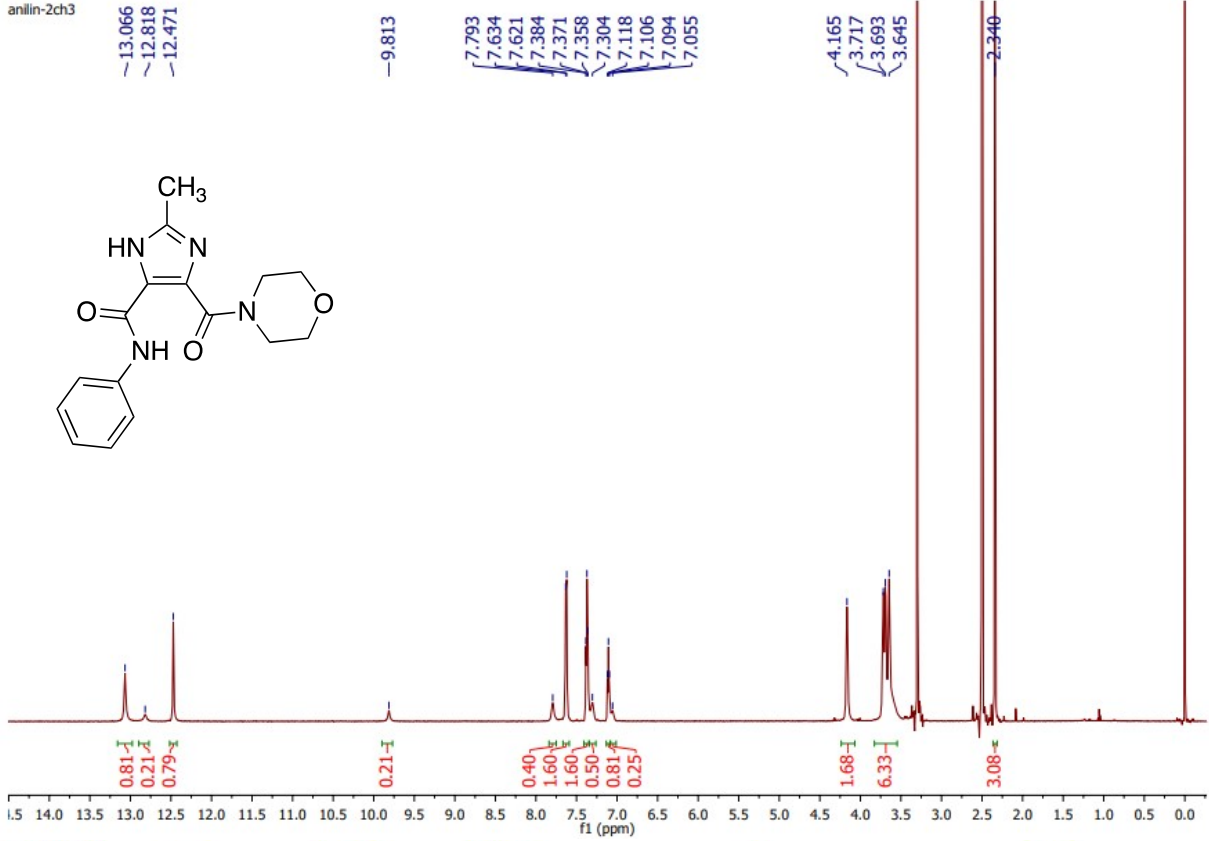

anilin-2ch3

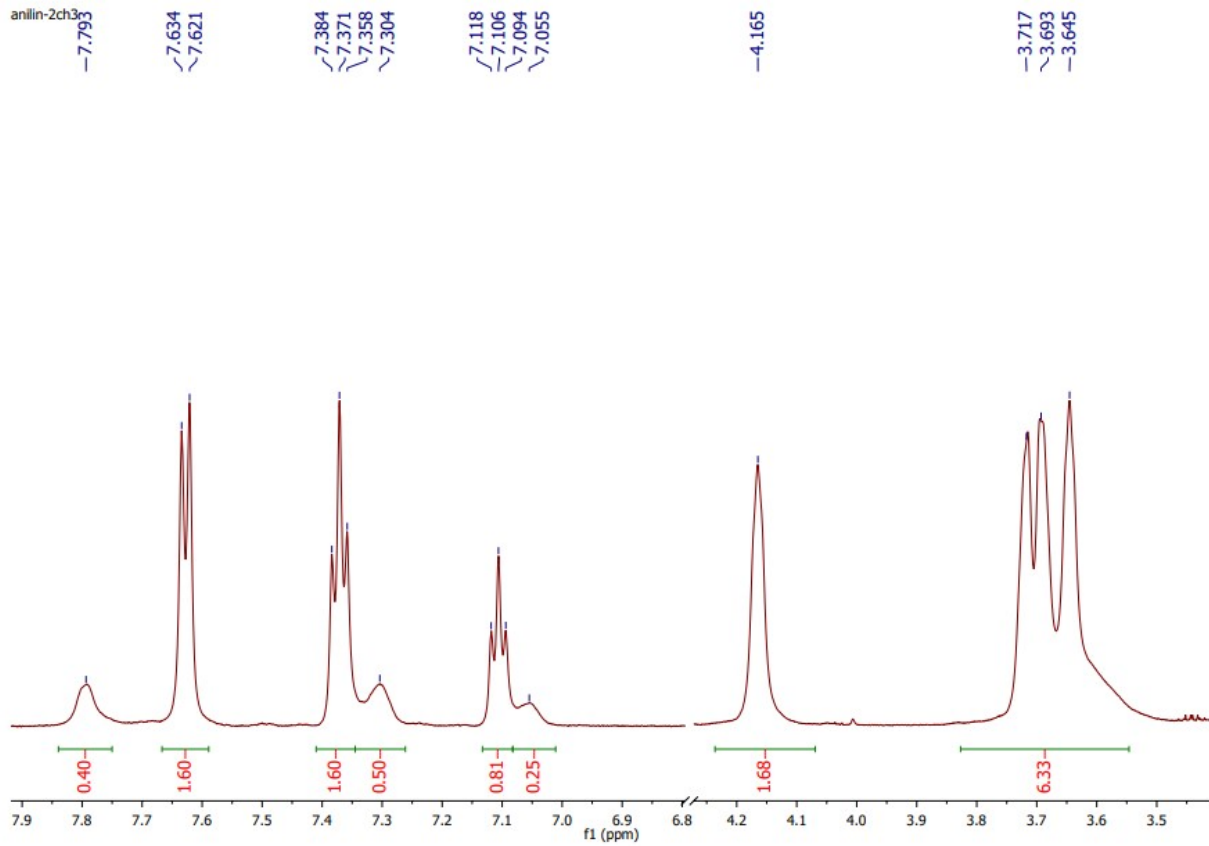



Compound **5a7** existed in the 2 conformers: the intramolecular hydrogen bonding and the non-intramolecular hydrogen bonding at approximate ratio of 8:2.

$^{13}\text{C}$ -NMR spectrum, 125 MHz,  $\text{DMSO-}d_6$  with 0.03% v/v TMS (TMS peak was at 0 ppm)

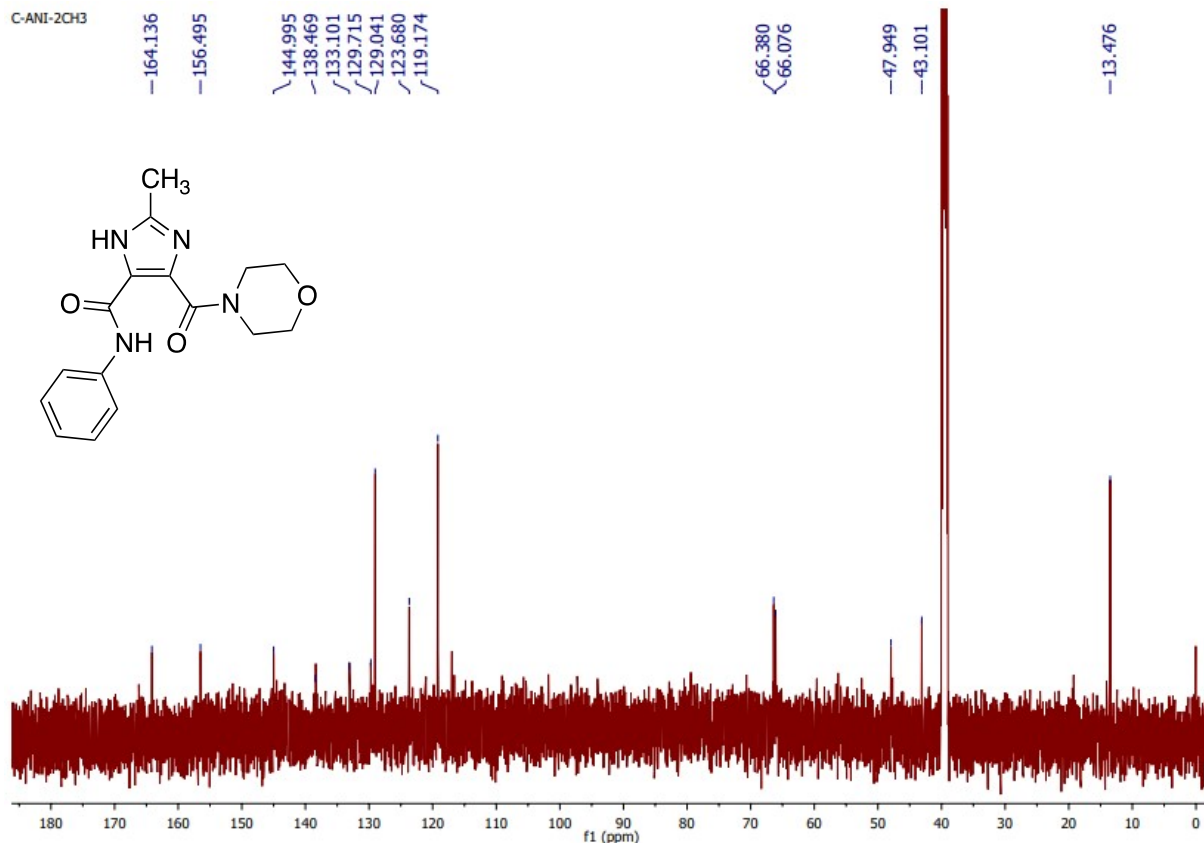

Compound **5b1**

IR spectrum

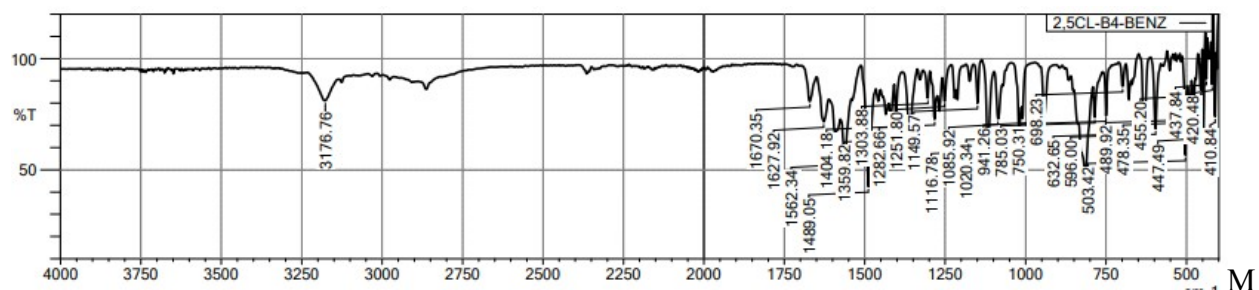

S spectrum

MSMS: Precursor m/z ----- /+ Base Peak 701.49(3493435)

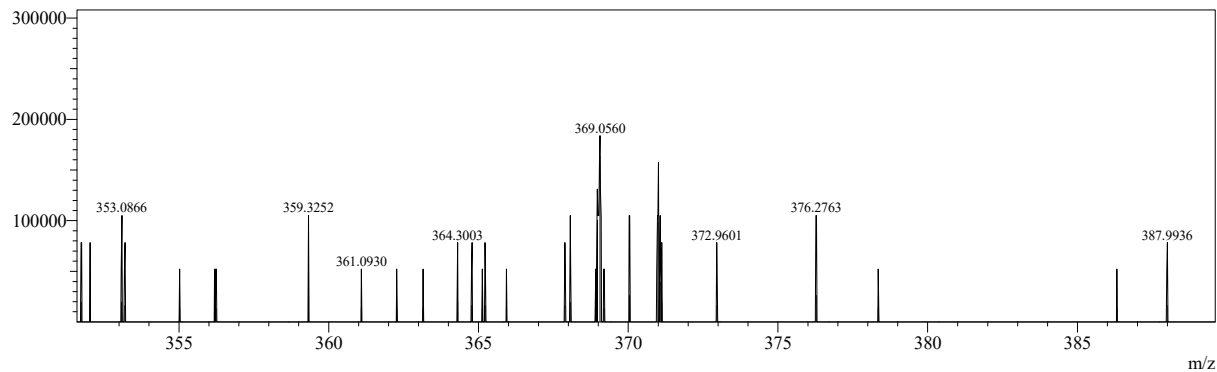

MSMS: Precursor m/z ----- /- Base Peak 367.03(3536409)

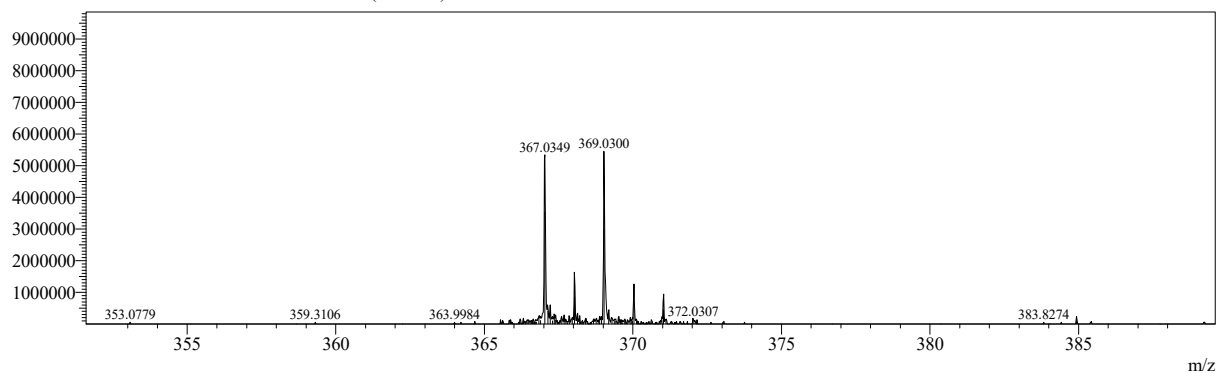

<sup>1</sup>H-NMR spectrum, 600 MHz, DMSO-d<sub>6</sub>

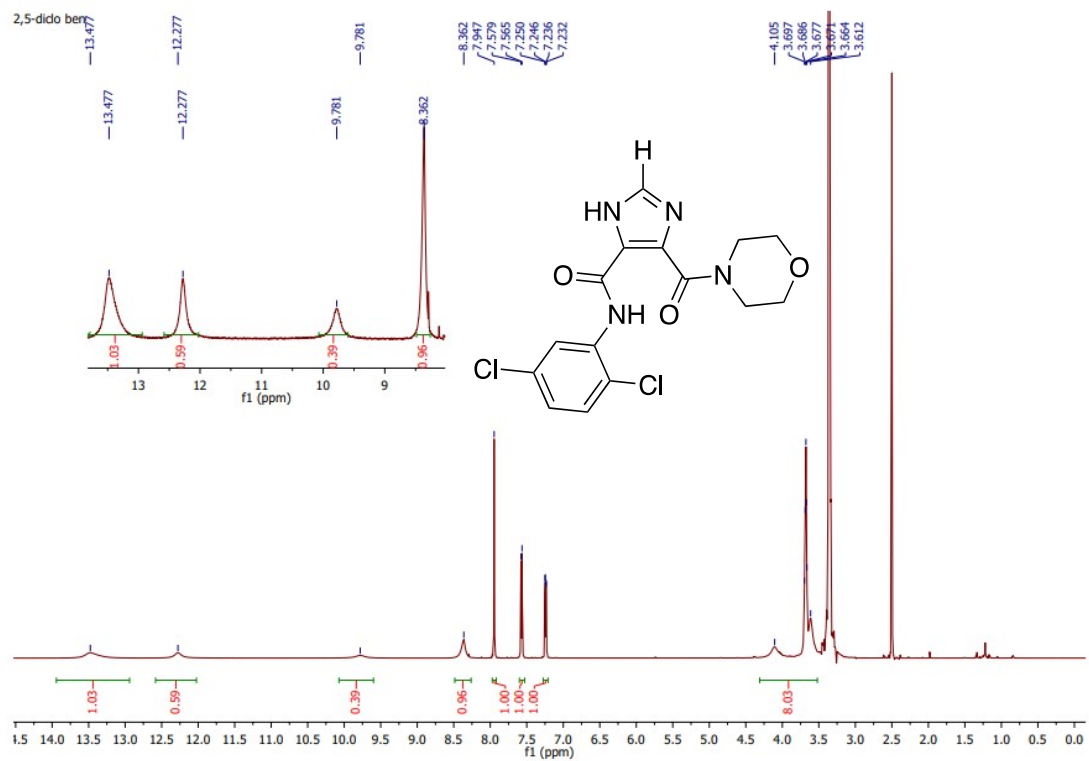

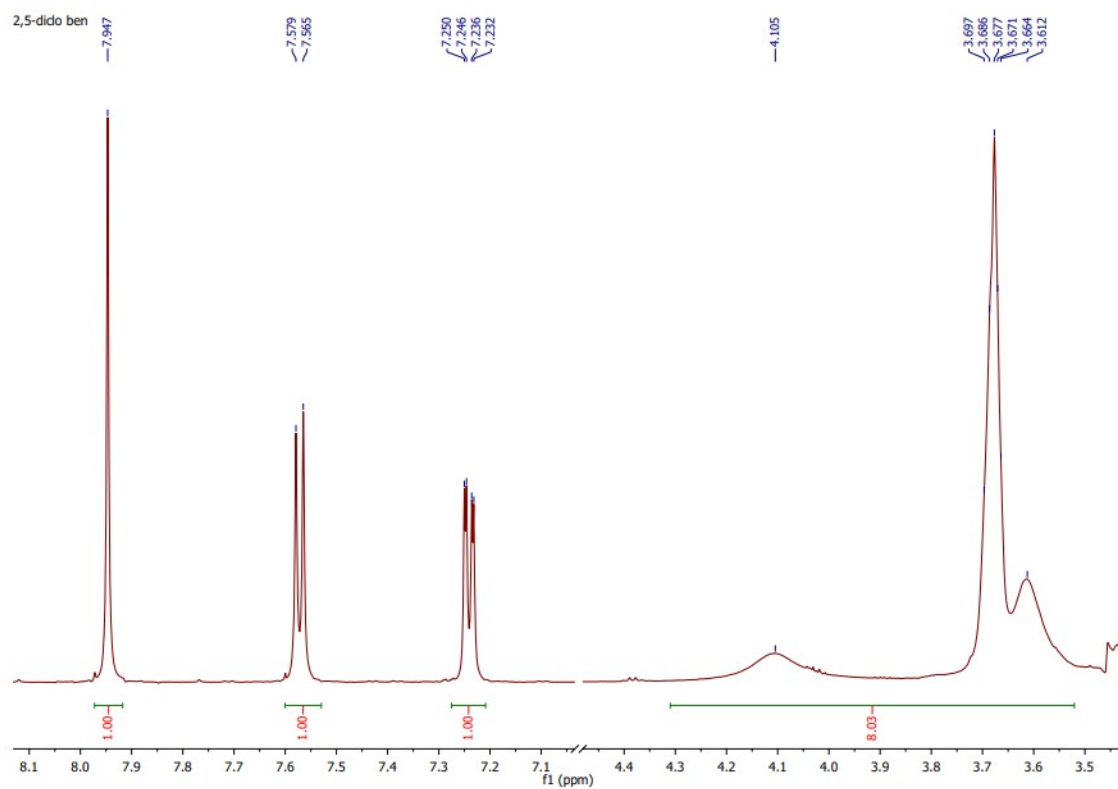

Compound **5b1** existed in the 2 conformers: the intramolecular hydrogen bonding and the non-intramolecular hydrogen bonding at approximate ratio of 6:4.

$^{13}\text{C}$ -NMR spectrum, 125 MHz,  $\text{DMSO-}d_6$  with 0.03% v/v TMS (TMS peak was at 0 ppm)

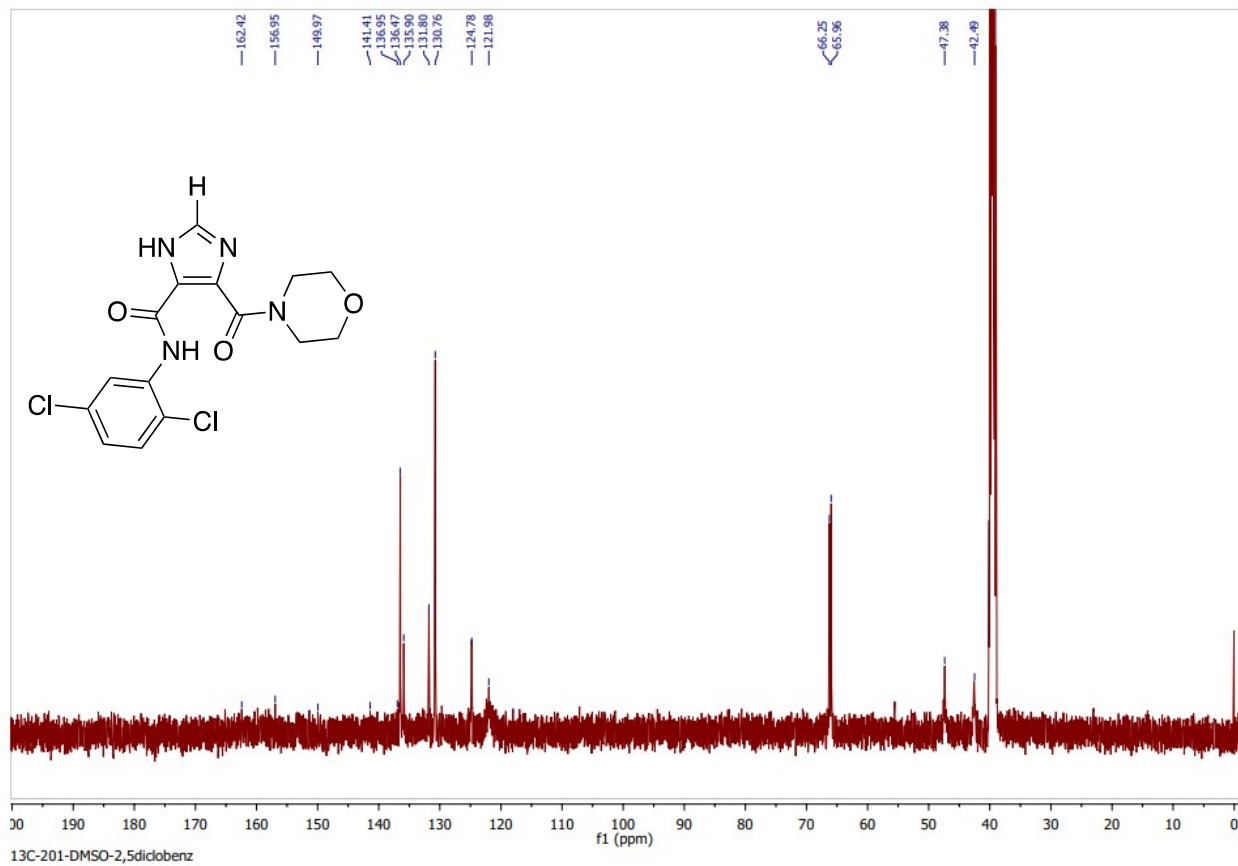

**Compound 5b2**

IR spectrum

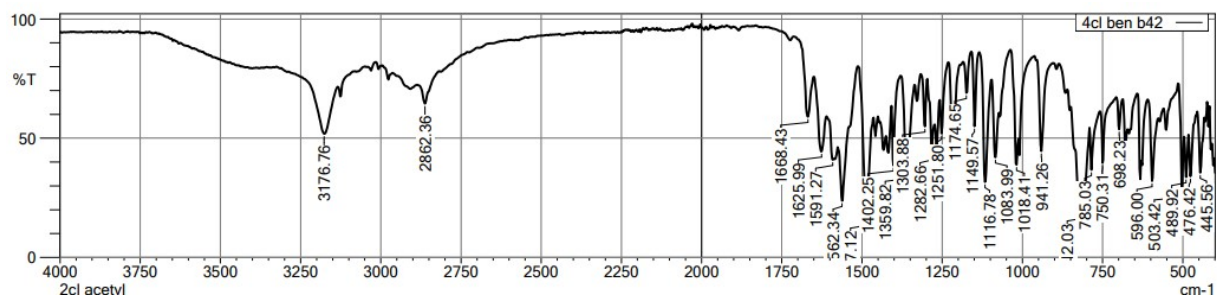

MS spectrum

MSMS: Precursor m/z ----- /+ Base Peak 179.02(2186970)

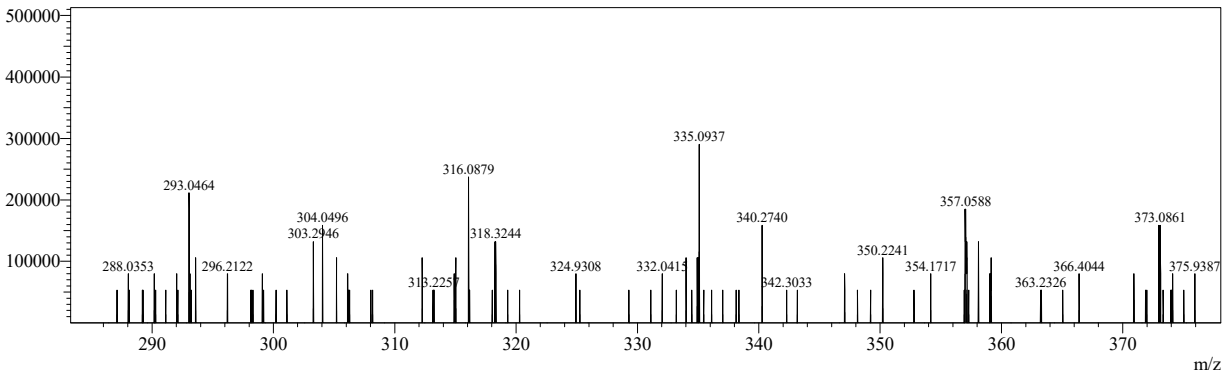

MSMS: Precursor m/z ----- /- Base Peak 226.98(2176613)

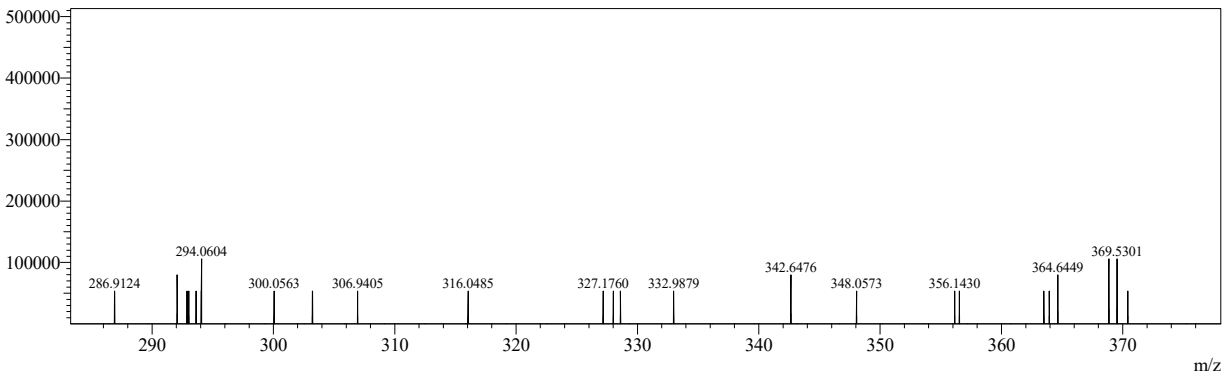

<sup>1</sup>H-NMR spectrum, 125 MHz, DMSO-d<sub>6</sub> with 0.03% v/v TMS (TMS peak was at 0 ppm)

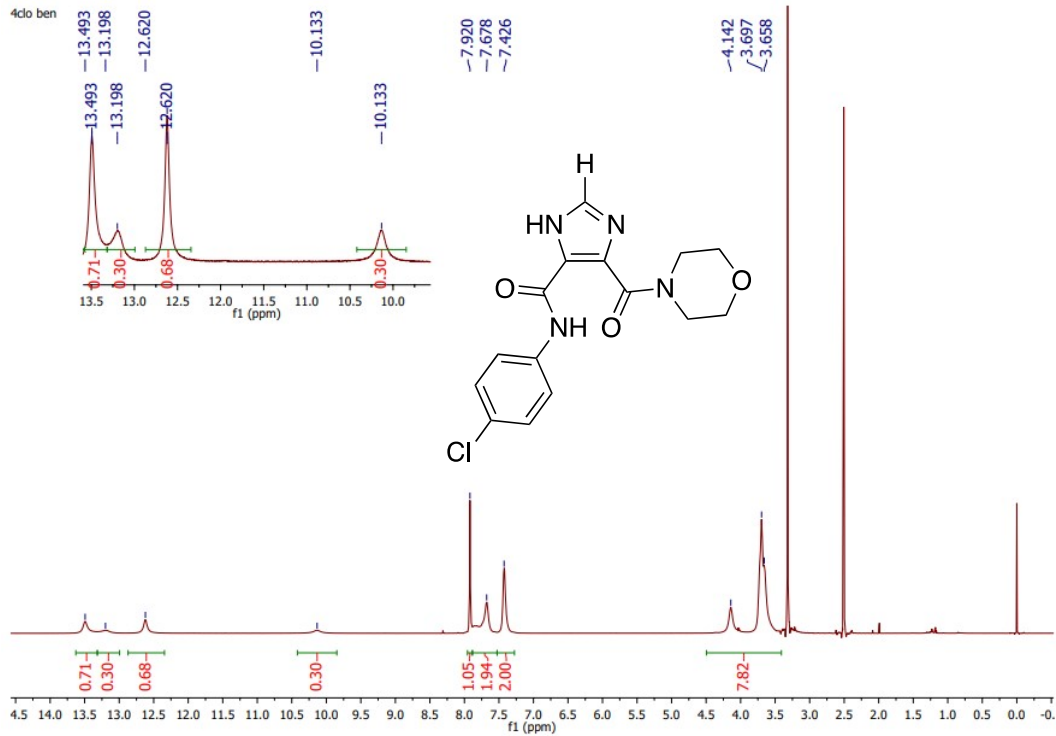

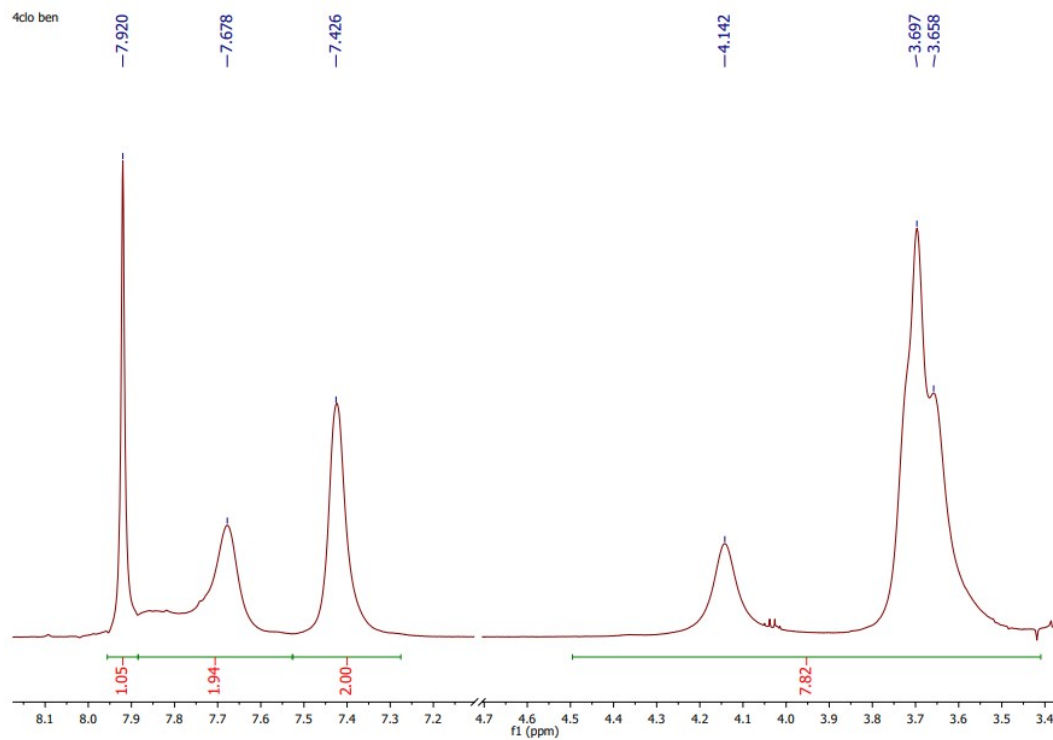

Compound **5b2** existed in the 2 conformers: the intramolecular hydrogen bonding and the non-intramolecular hydrogen bonding at approximate ratio of 7:3.

$^{13}\text{C}$ -NMR spectrum, 125 MHz,  $\text{DMSO-}d_6$  with 0.03% v/v TMS (TMS peak was at 0 ppm)

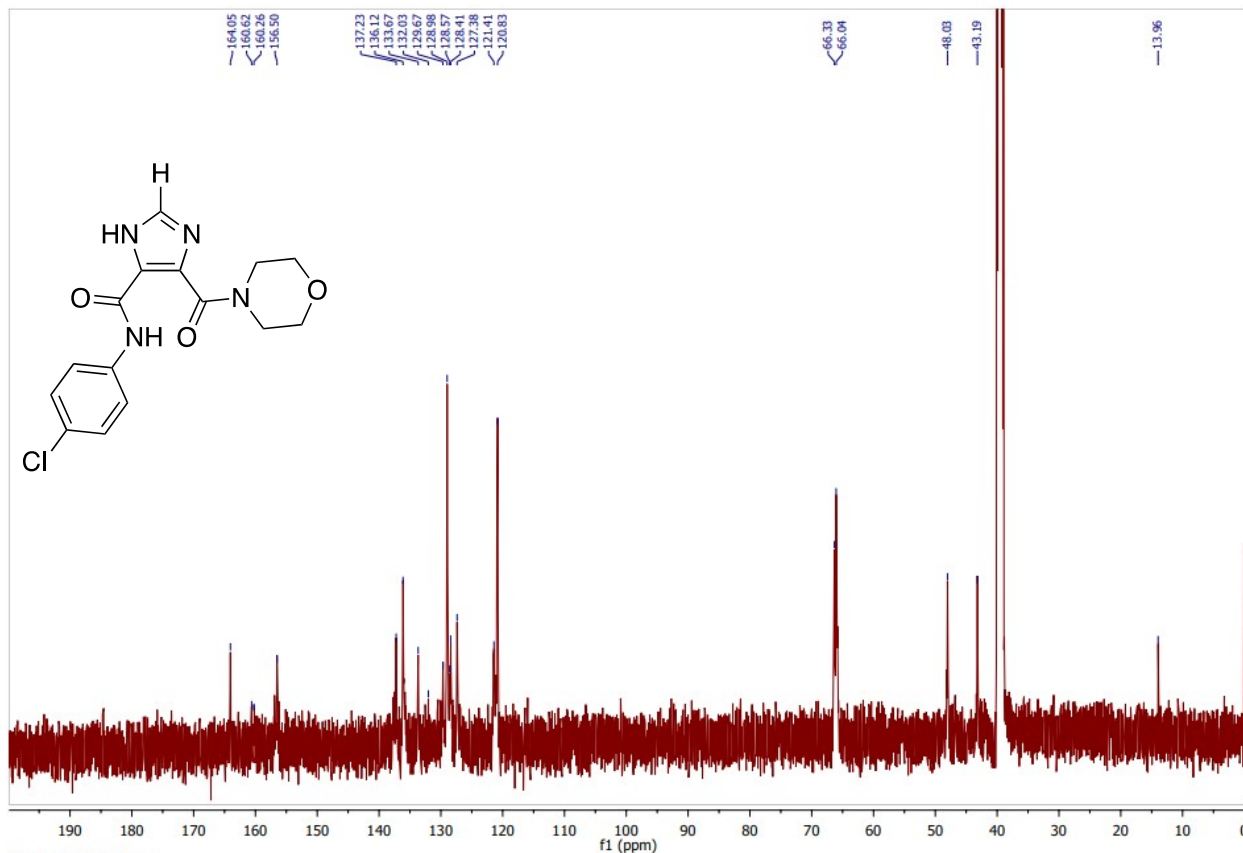

13C-202-DMSO-4clobenz  
*Compound 5b3*

IR spectrum

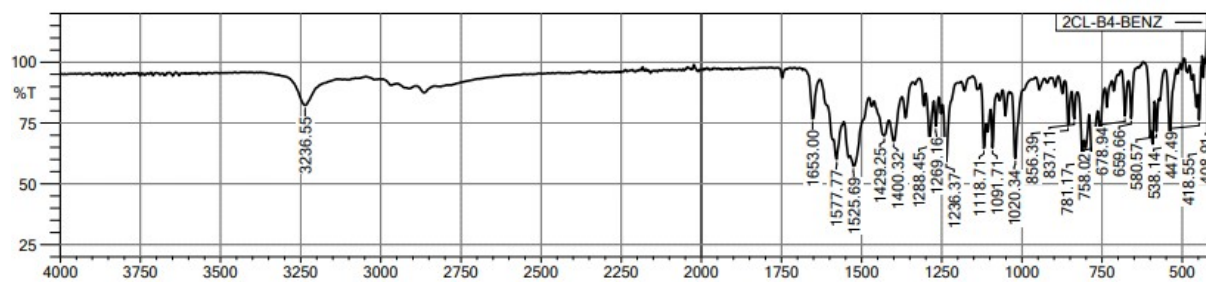

MS spectrum

MSMS: Precursor m/z ----- /+ Base Peak 261.16(354238)

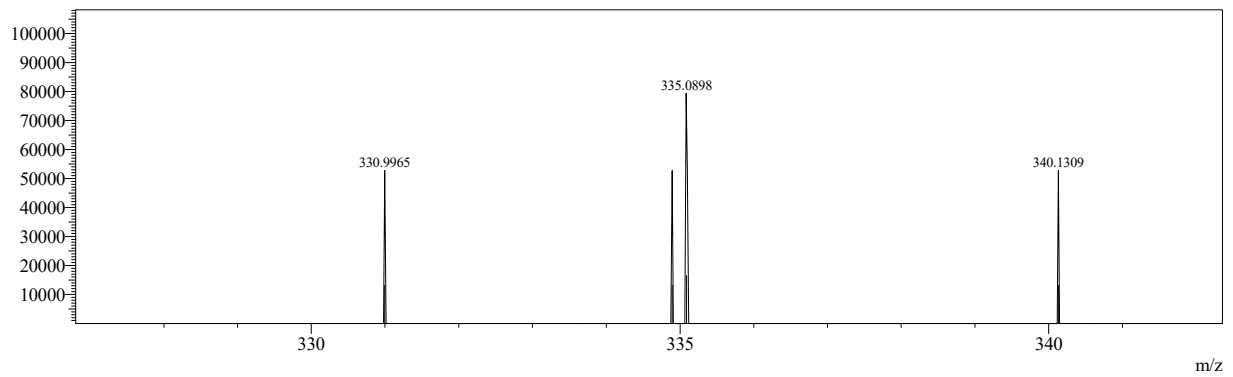

MSMS: Precursor m/z ----- /- Base Peak 226.97(1359507)

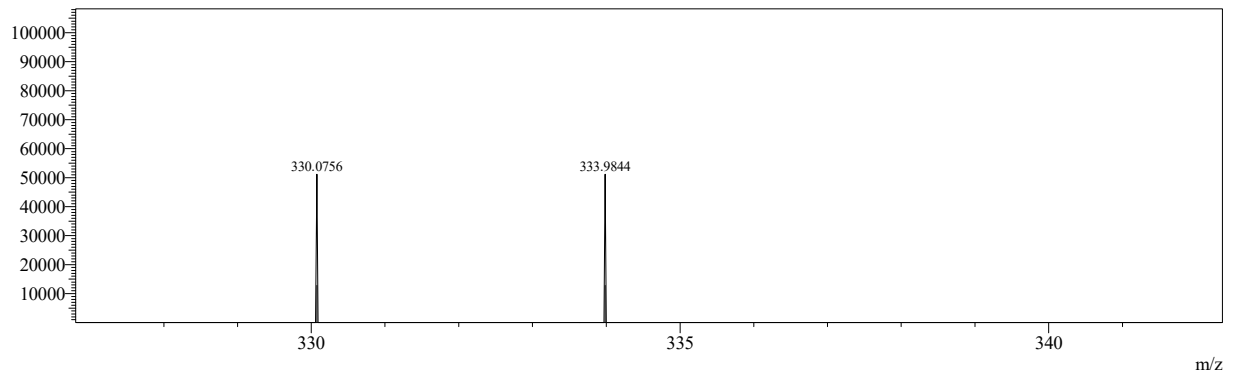

<sup>1</sup>H-NMR spectrum, 600 MHz, DMSO-d<sub>6</sub>

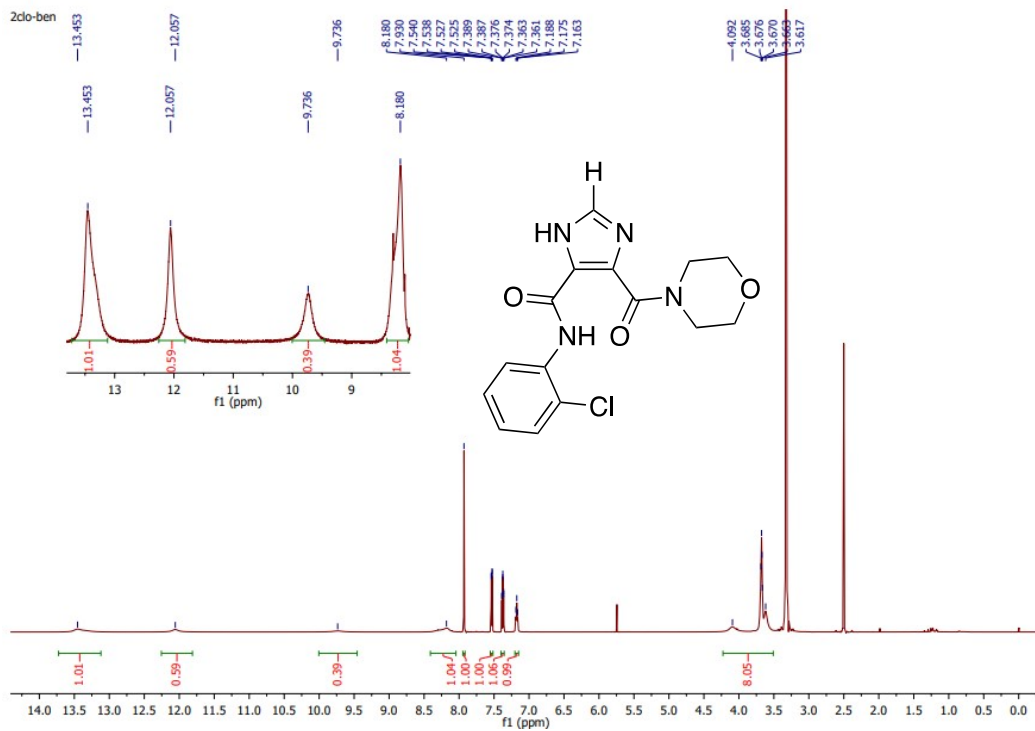



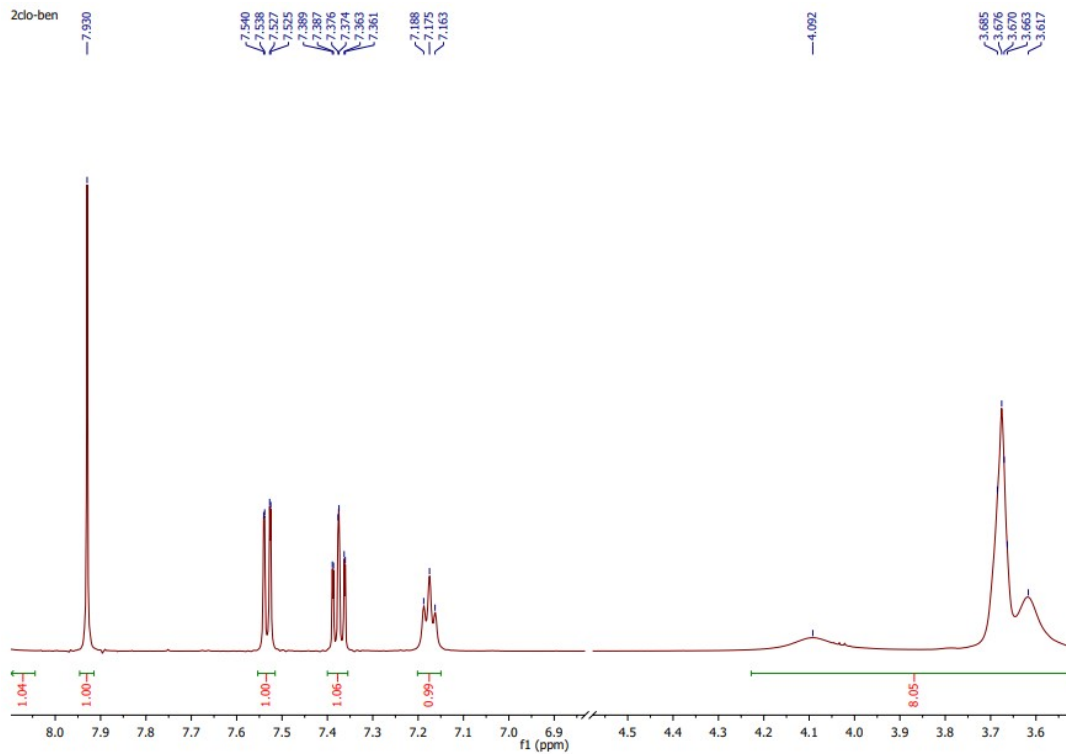

Compound **5b3** existed in the 2 conformers in DMSO: the intramolecular hydrogen bonding and the non-intramolecular hydrogen bonding at approximate ratio of 6:4.

$^1\text{H-NMR}$  spectrum, 500 MHz,  $\text{CDCl}_3$  with 0.05% v/v TMS (TMS peak was at 0 ppm)

zclo ben

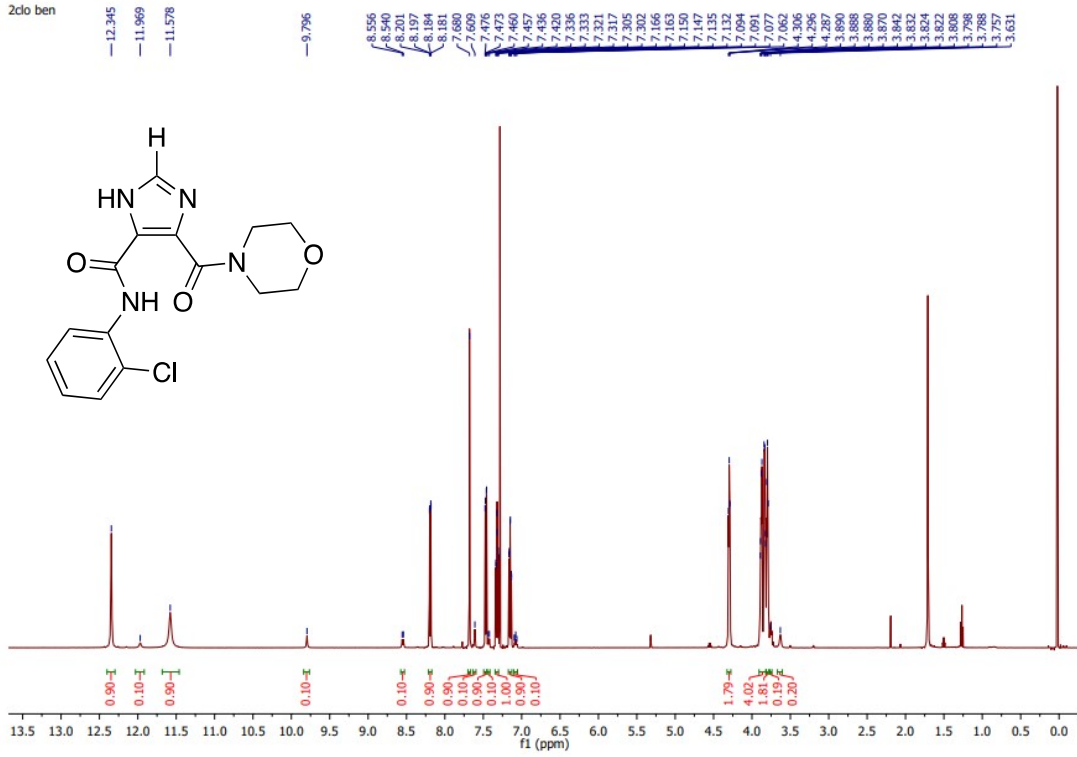

zclo ben

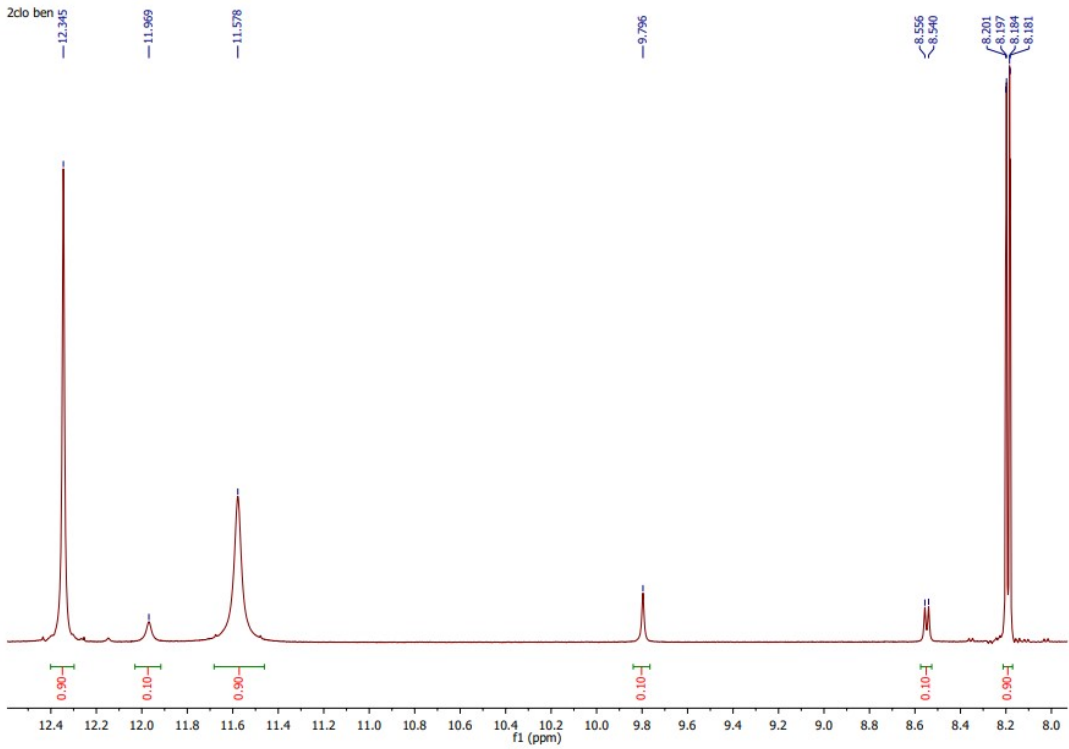

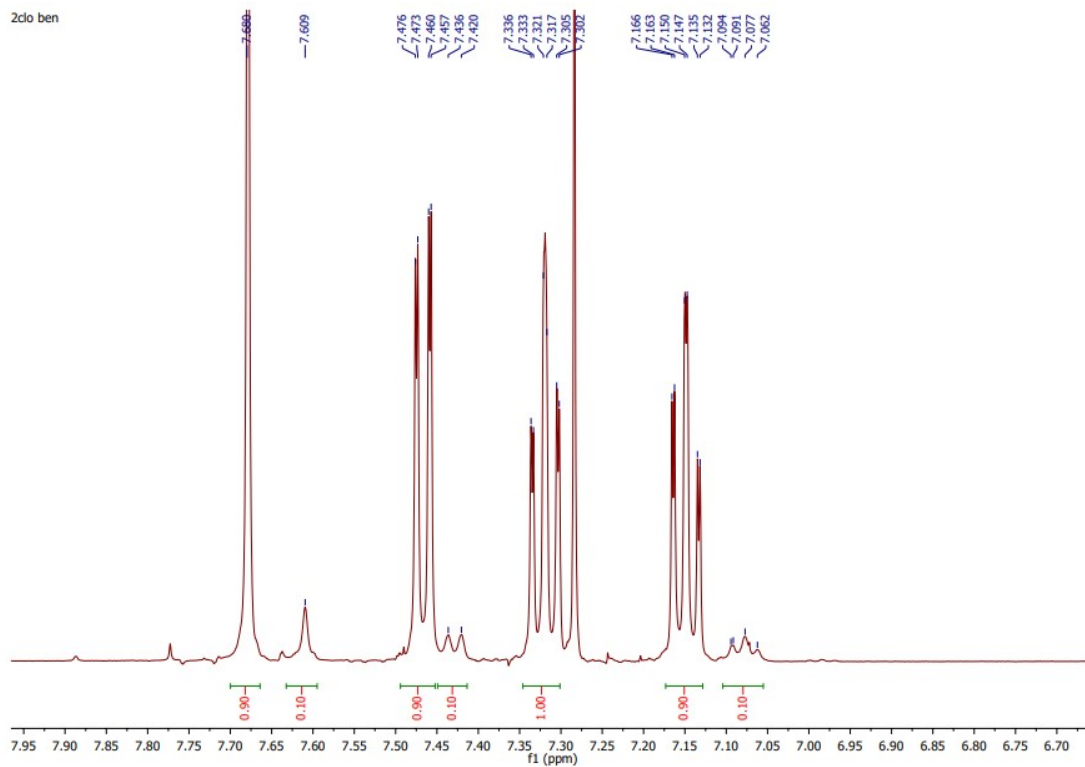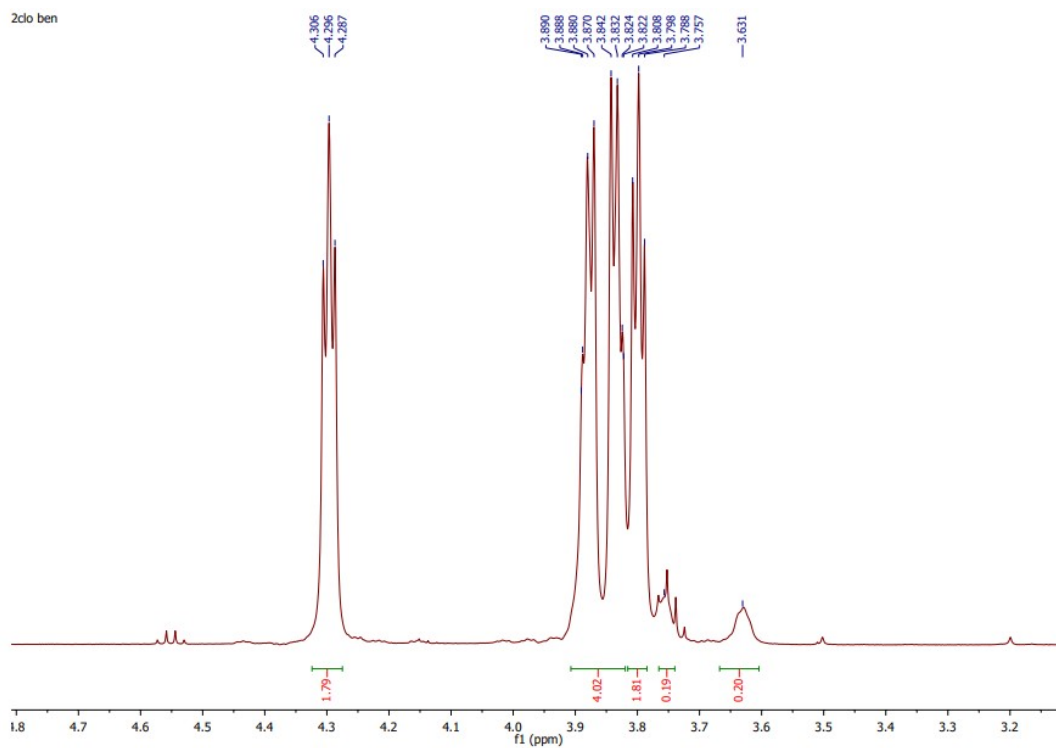

Compound **5b3** existed in the 2 conformers in  $\text{CDCl}_3$ : the intramolecular hydrogen bonding and the non-intramolecular hydrogen bonding at approximate ratio of 9:1.

$^{13}\text{C}$ -NMR spectrum, 125 MHz,  $\text{DMSO-}d_6$  with 0.03% v/v TMS (TMS peak was at 0 ppm)

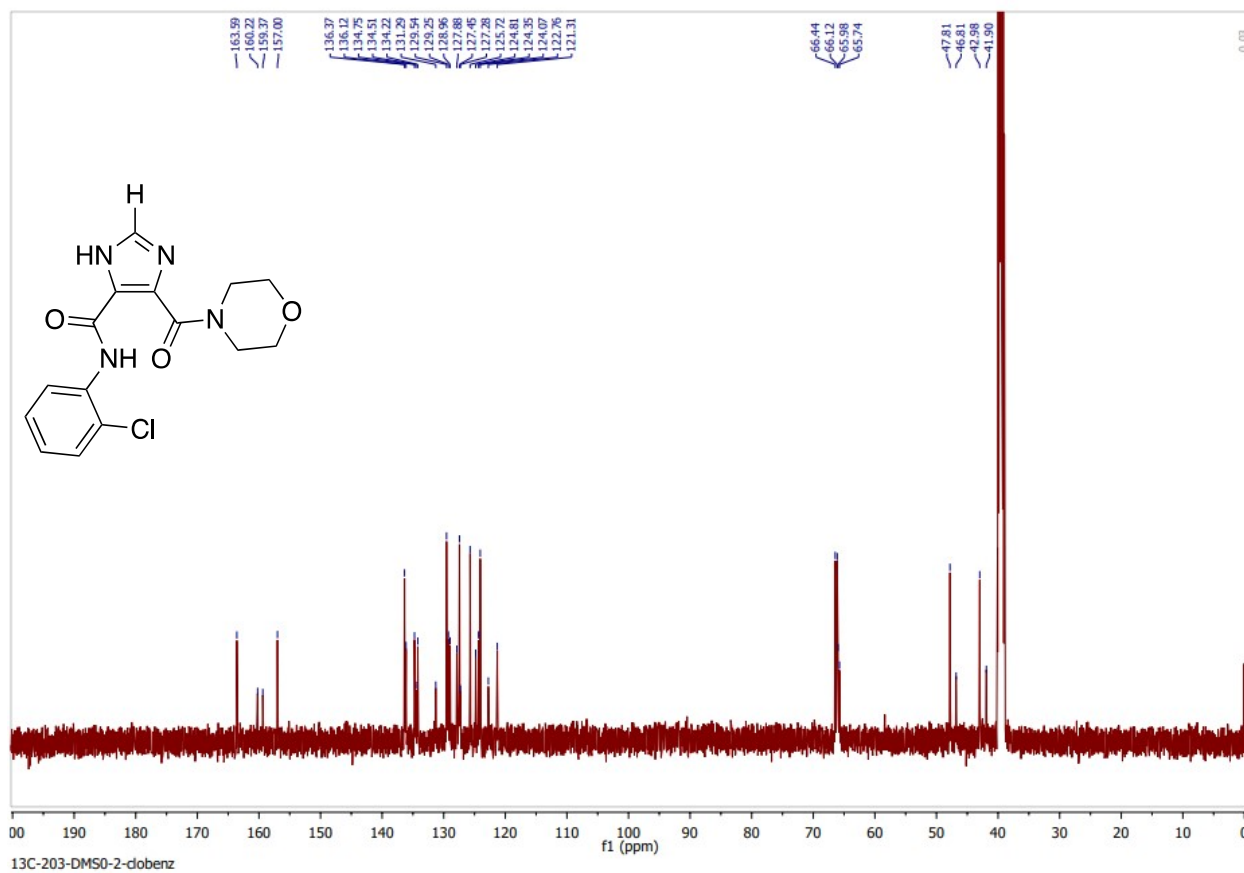

Compound 5b4

IR spectrum

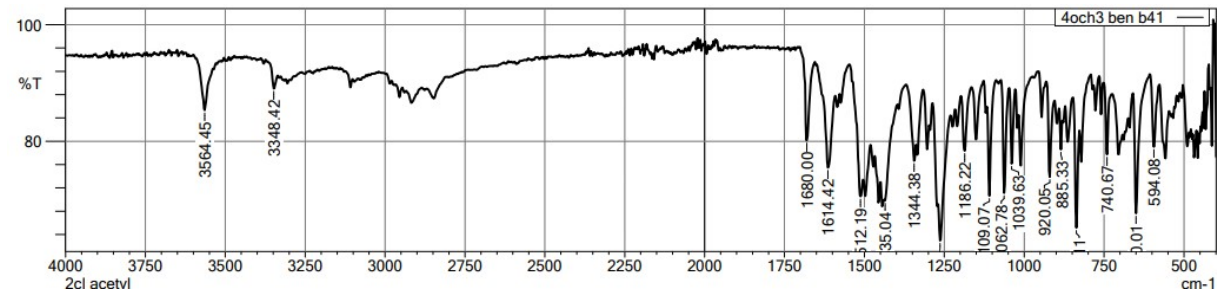

MS spectrum

MSMS: Precursor m/z ----- /+ Base Peak 414.03(4690447)

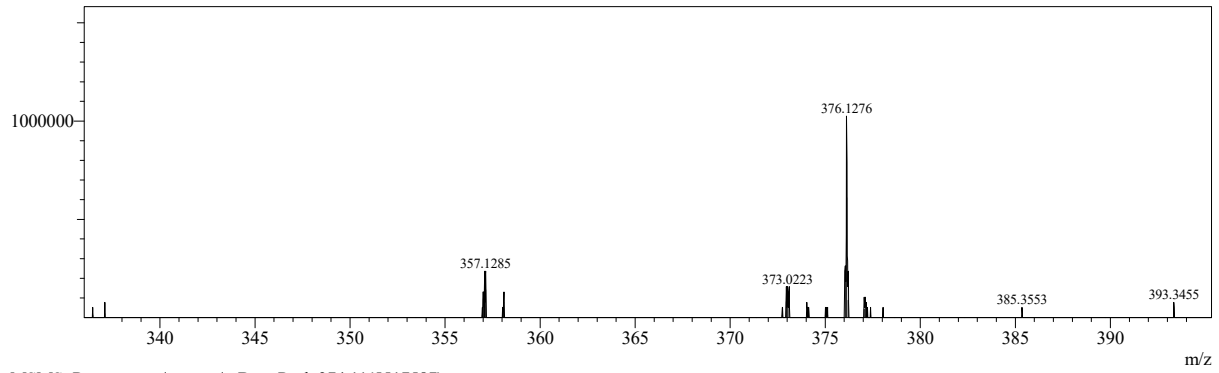

MSMS: Precursor m/z ----- /- Base Peak 374.11(5517587)

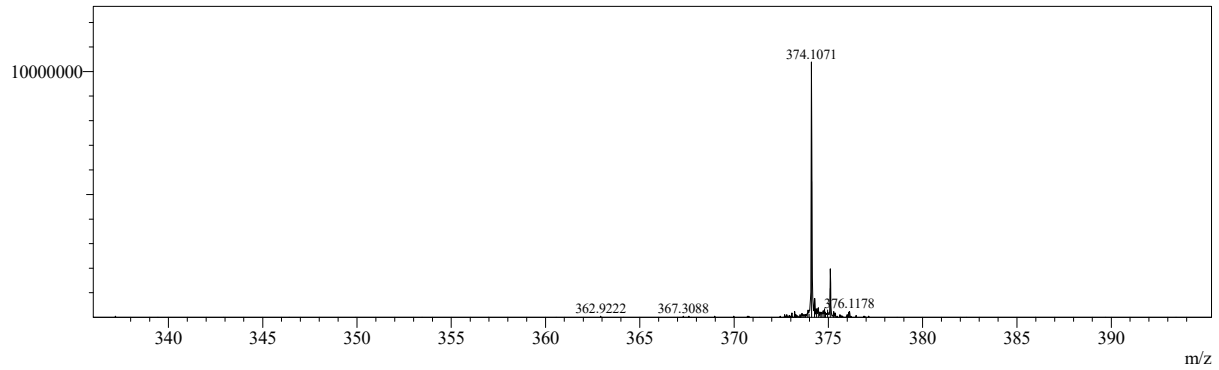

<sup>1</sup>H-NMR spectrum, 600 MHz, DMSO-d<sub>6</sub>

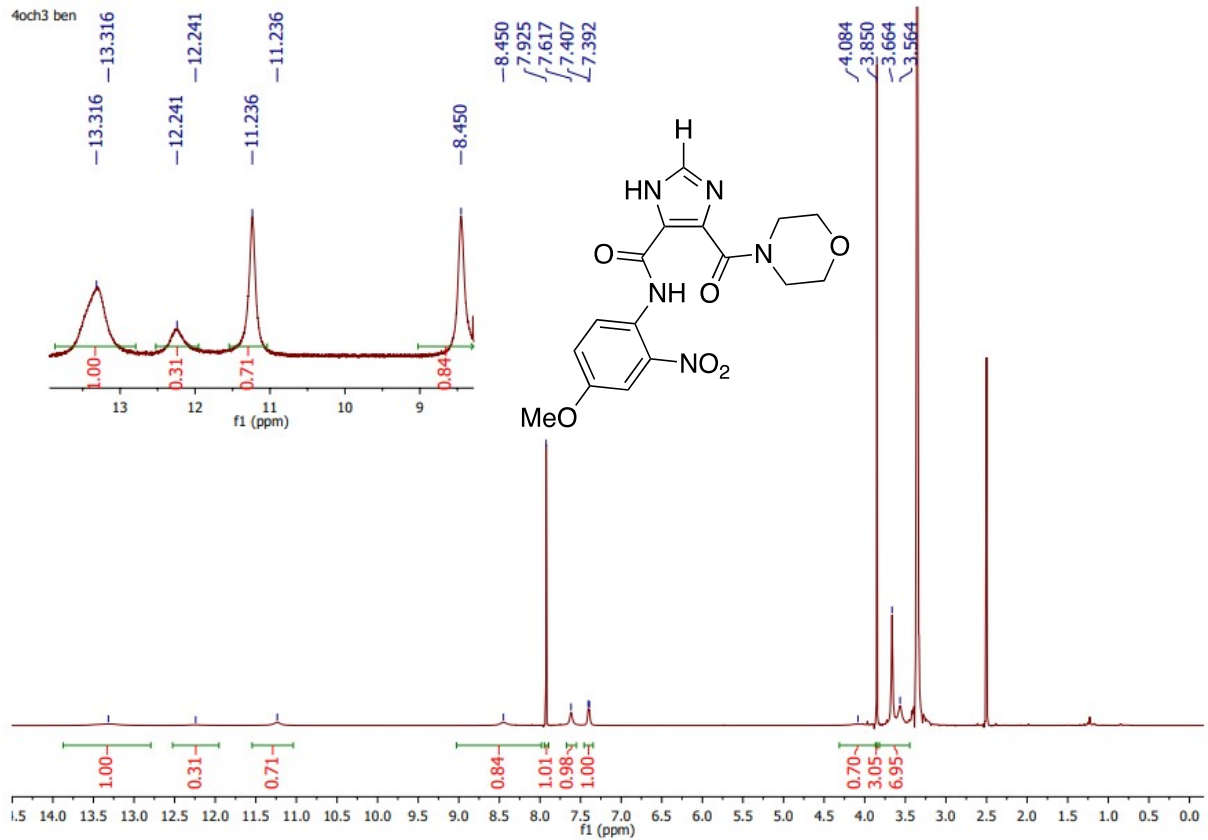

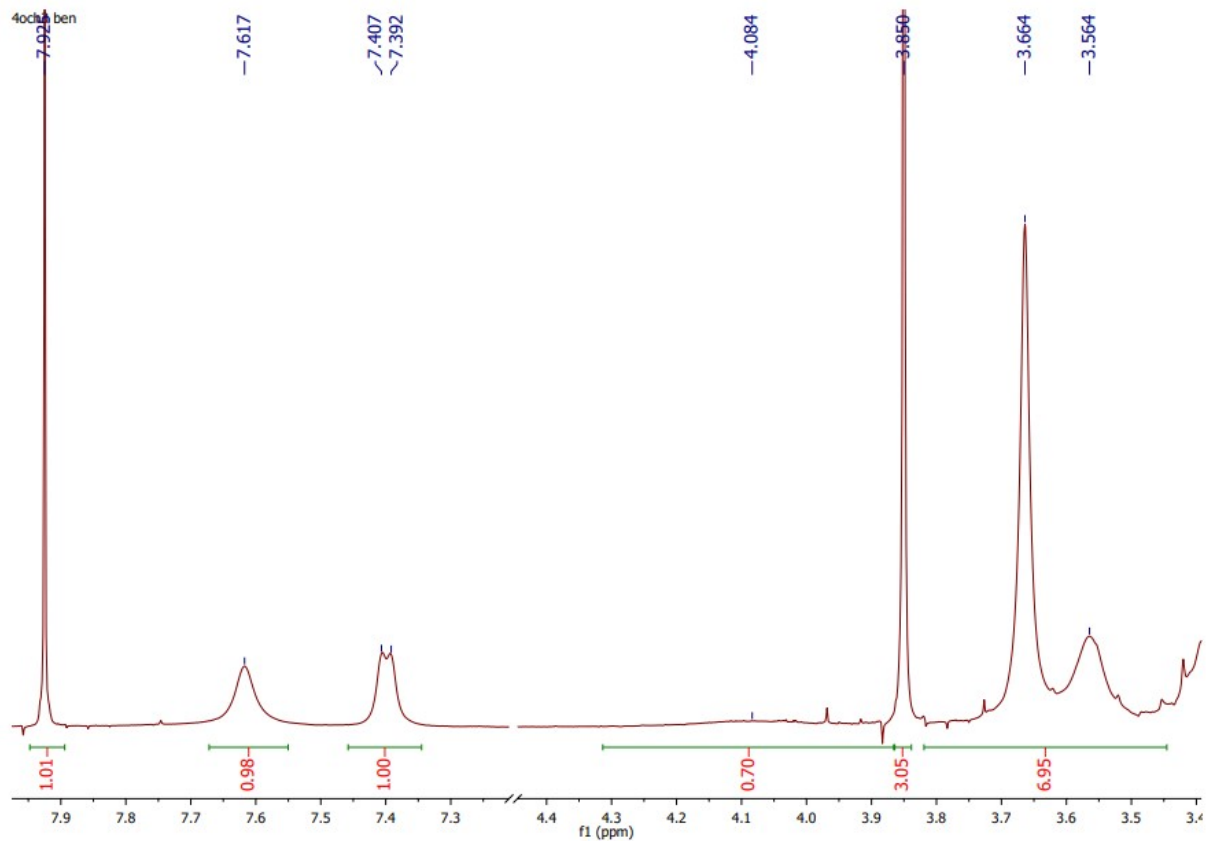

Compound **5b4** existed in the 2 conformers: the intramolecular hydrogen bonding and the non-intramolecular hydrogen bonding at approximate ratio of 3:7.

<sup>13</sup>C-NMR spectrum, 125 MHz, DMSO-*d*<sub>6</sub> with 0.03% v/v TMS (TMS peak was at 0 ppm)

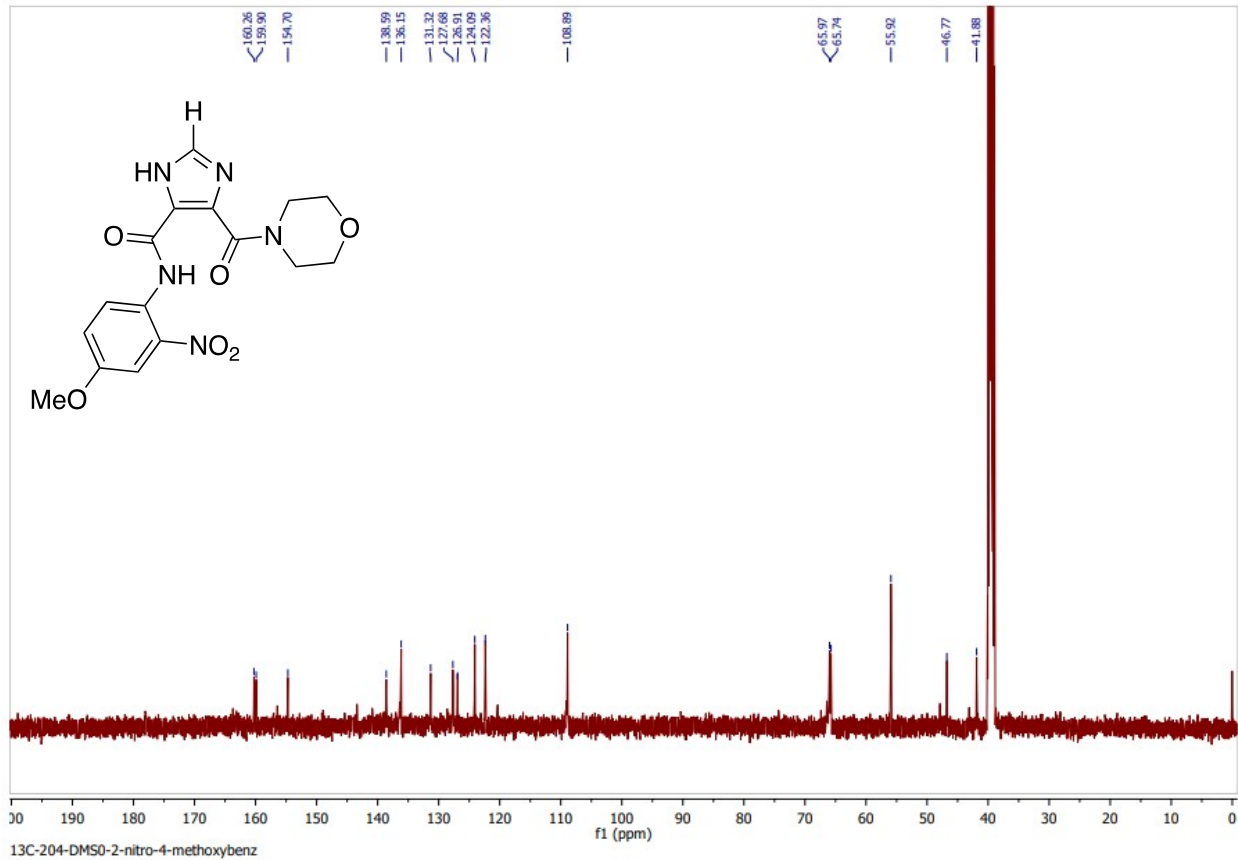

Compound 5b5

IR spectrum

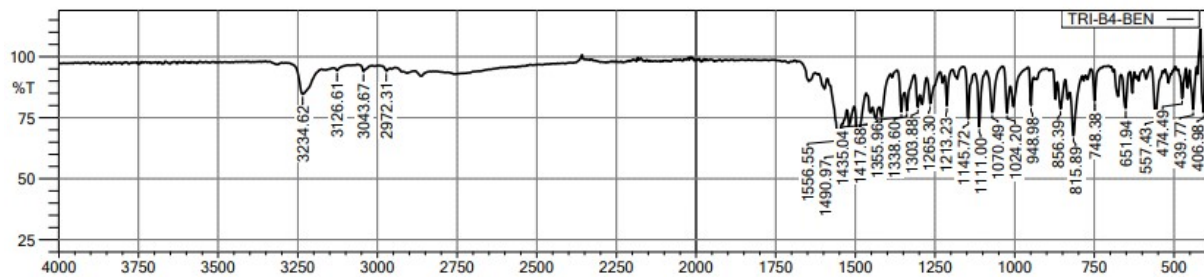

MS spectrum

MSMS: Precursor m/z ----- /+ Base Peak 274.24(320108)

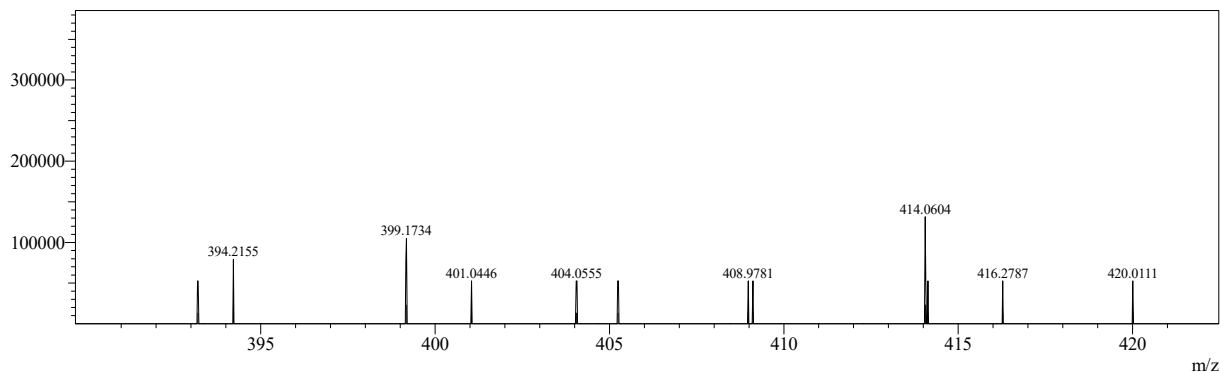

MSMS: Precursor m/z ----- /- Base Peak 226.98(1158827)

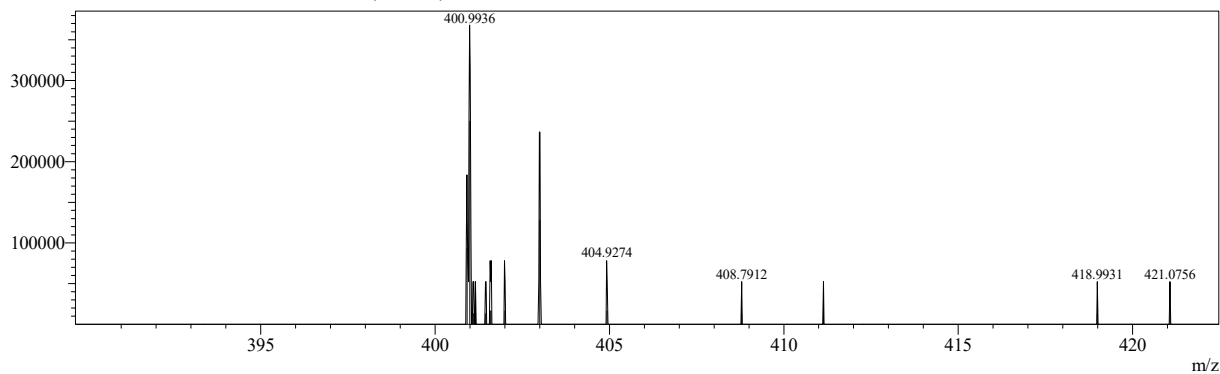

<sup>1</sup>H-NMR spectrum, 125 MHz, DMSO-d<sub>6</sub> with 0.03% v/v TMS (TMS peak was at 0 ppm)

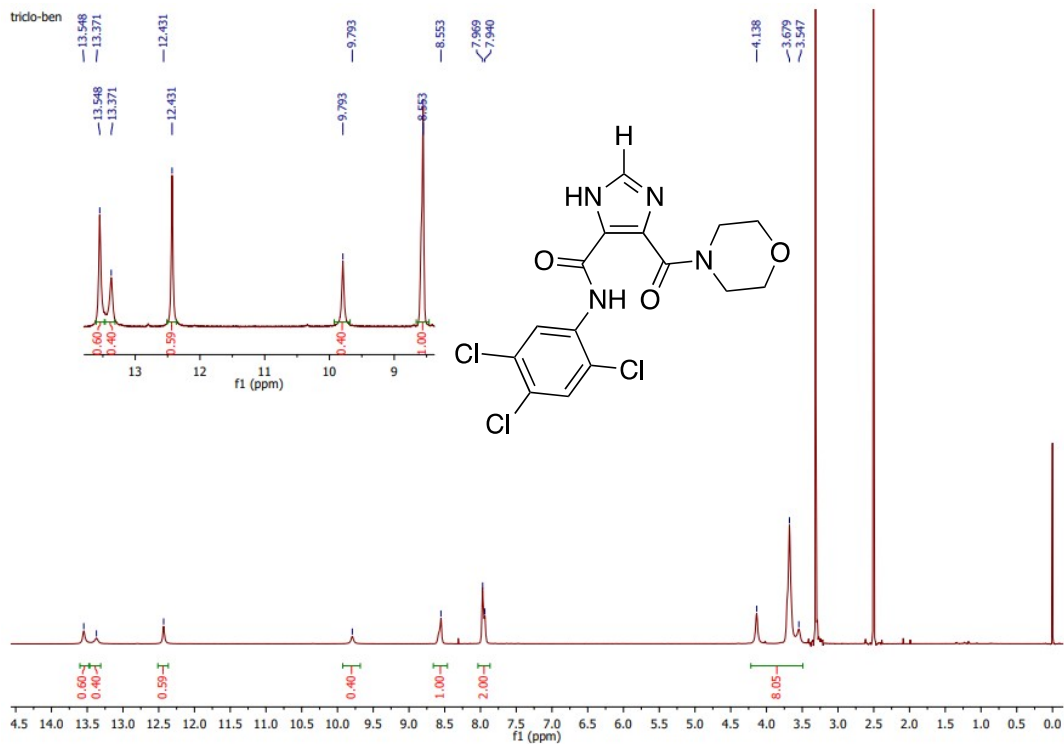



triclo-ben

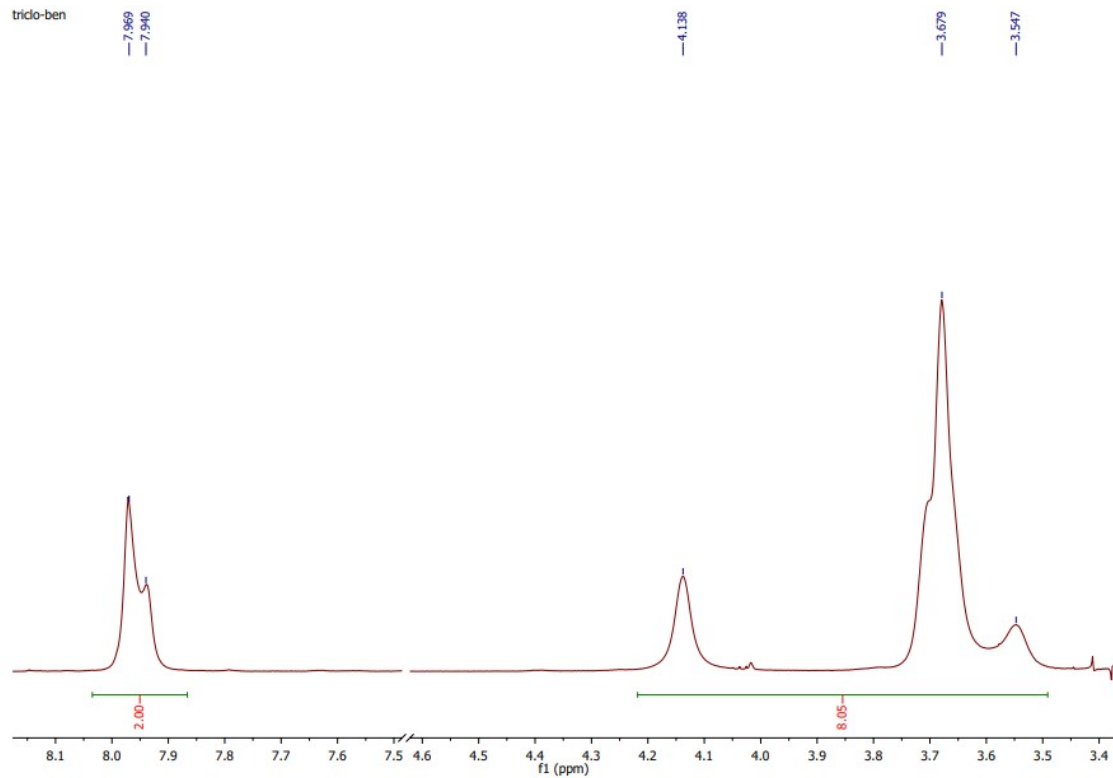

Compound **5b5** existed in the 2 conformers: the intramolecular hydrogen bonding and the non-intramolecular hydrogen bonding at approximate ratio of 6:4.

<sup>13</sup>C-NMR spectrum, 125 MHz, DMSO-*d*<sub>6</sub> with 0.03% v/v TMS (TMS peak was at 0 ppm)

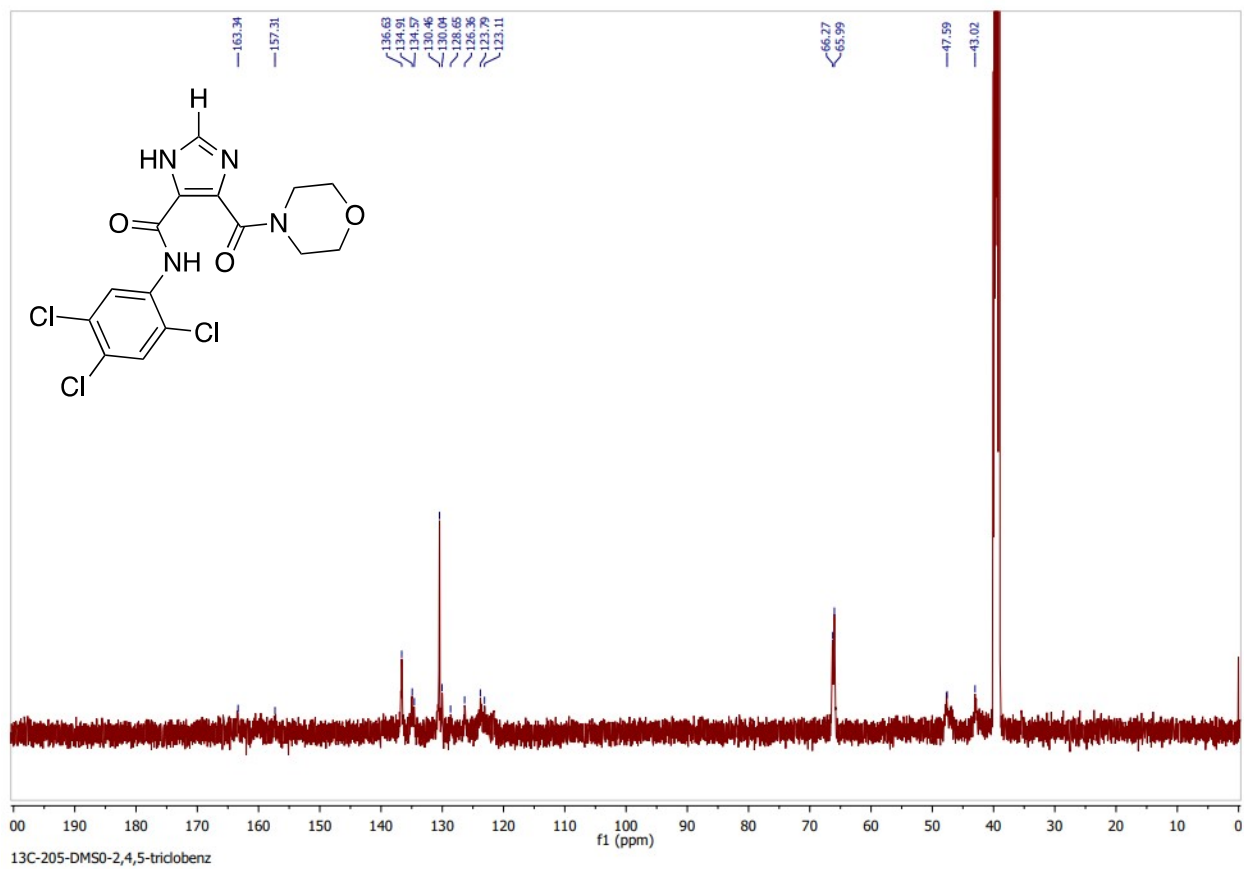

*Compound 5b6*

IR spectrum

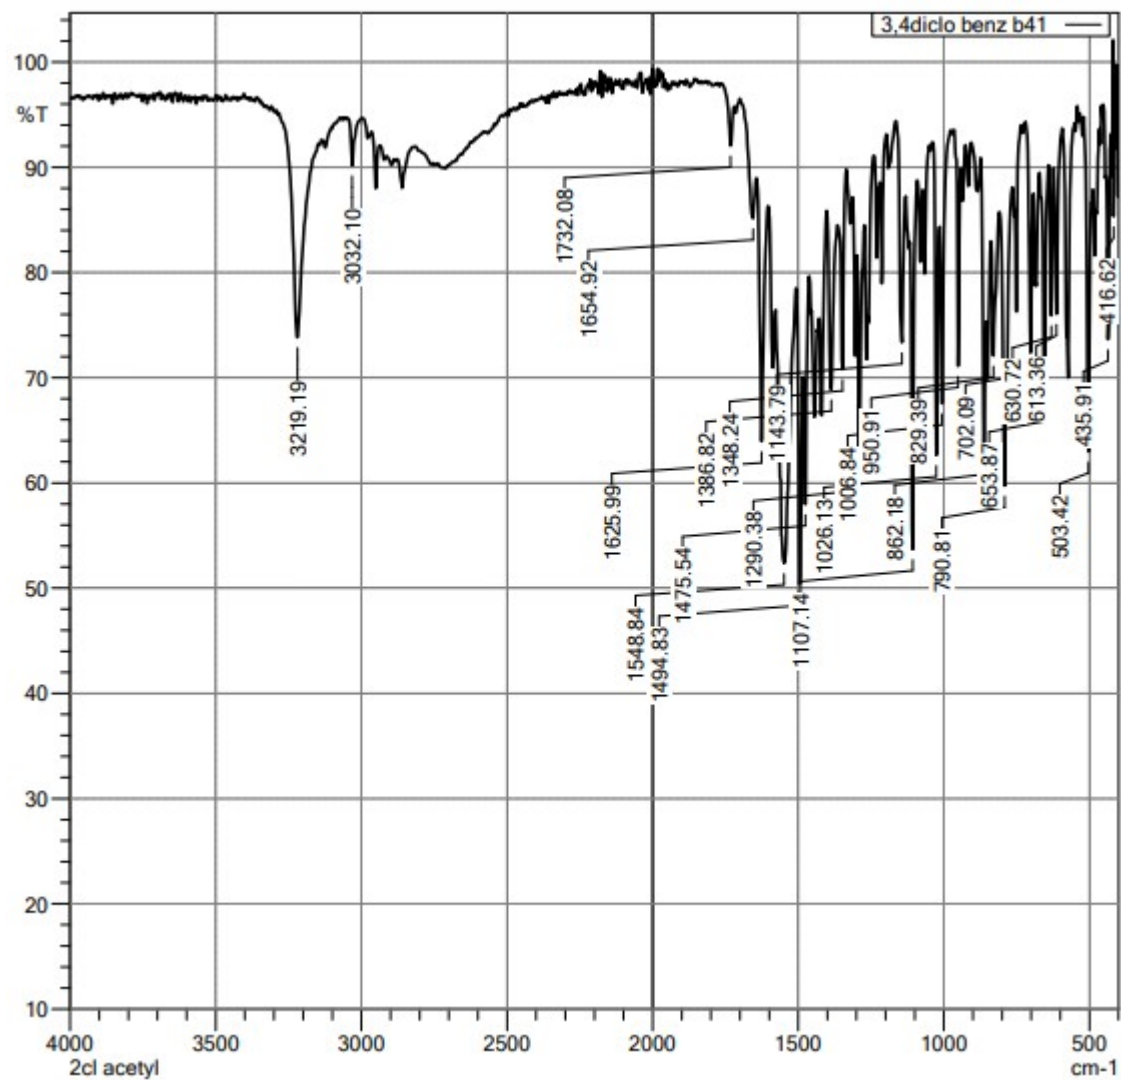

MS spectrum

MSMS: Precursor m/z ----- /+ Base Peak 179.01(12811080)

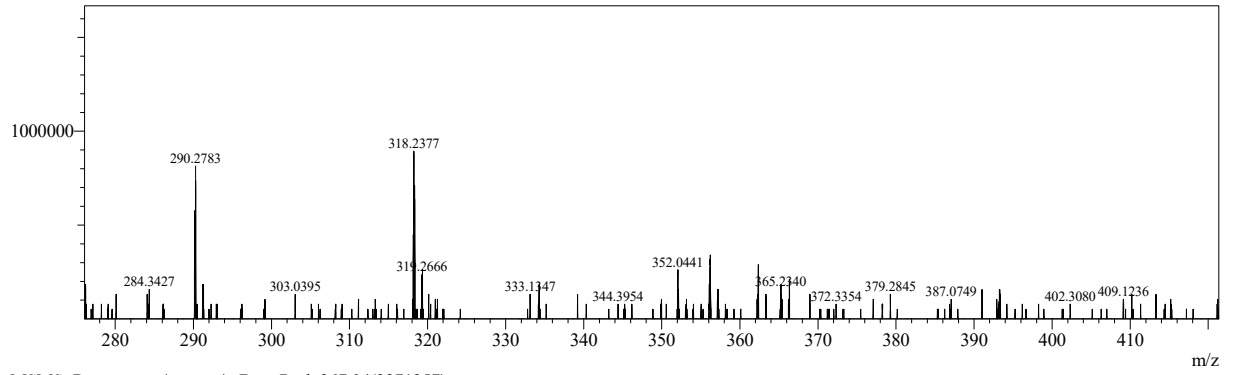

MSMS: Precursor m/z ----- /- Base Peak 367.04(3271357)

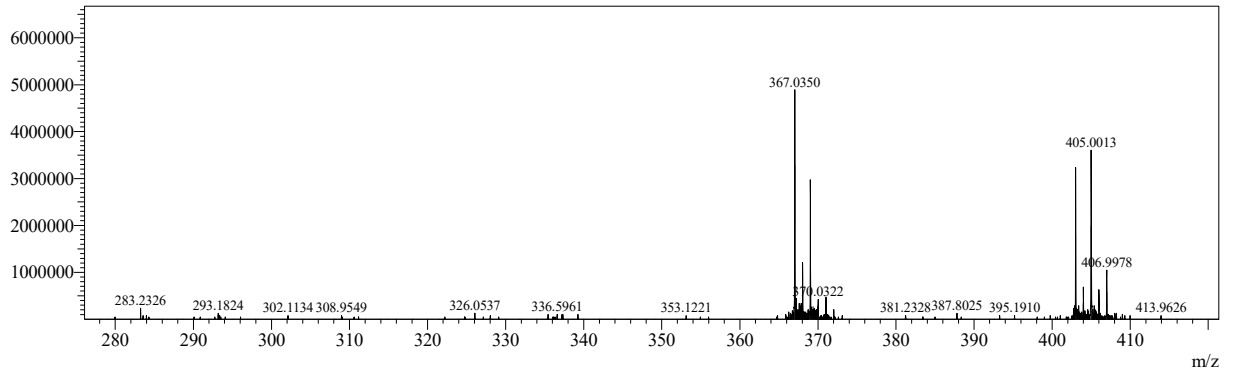

<sup>1</sup>H-NMR spectrum, 600 MHz, DMSO-d<sub>6</sub>

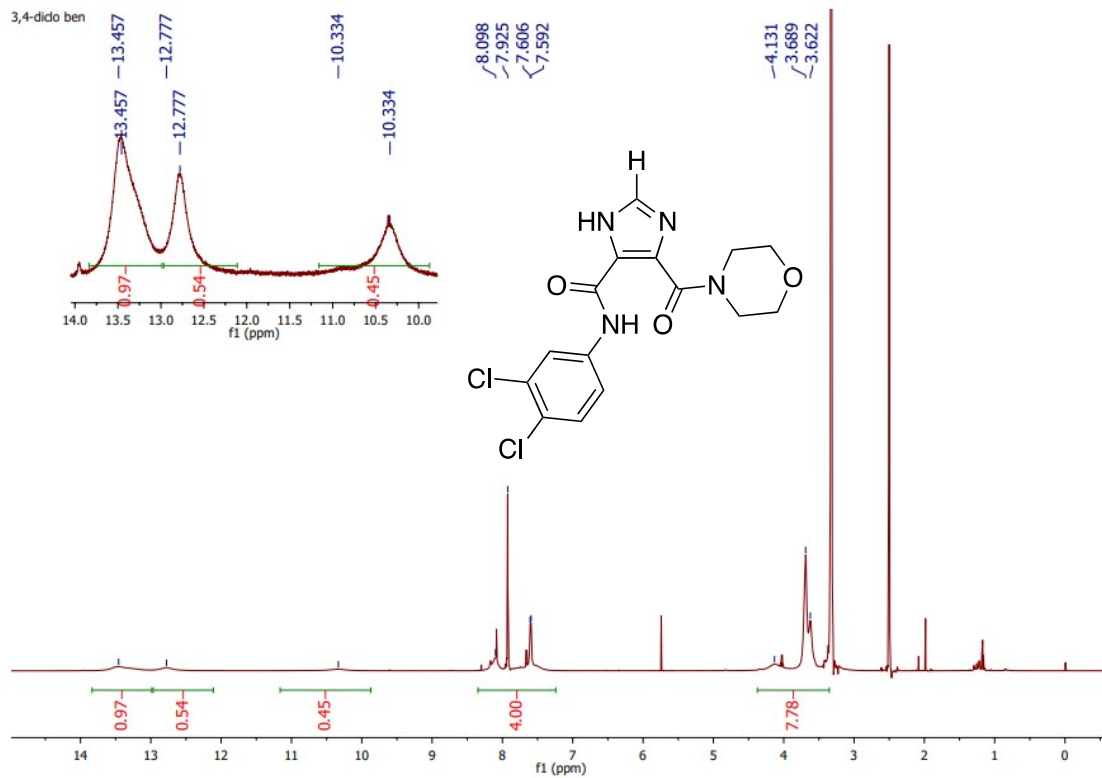

3,4-dido ben

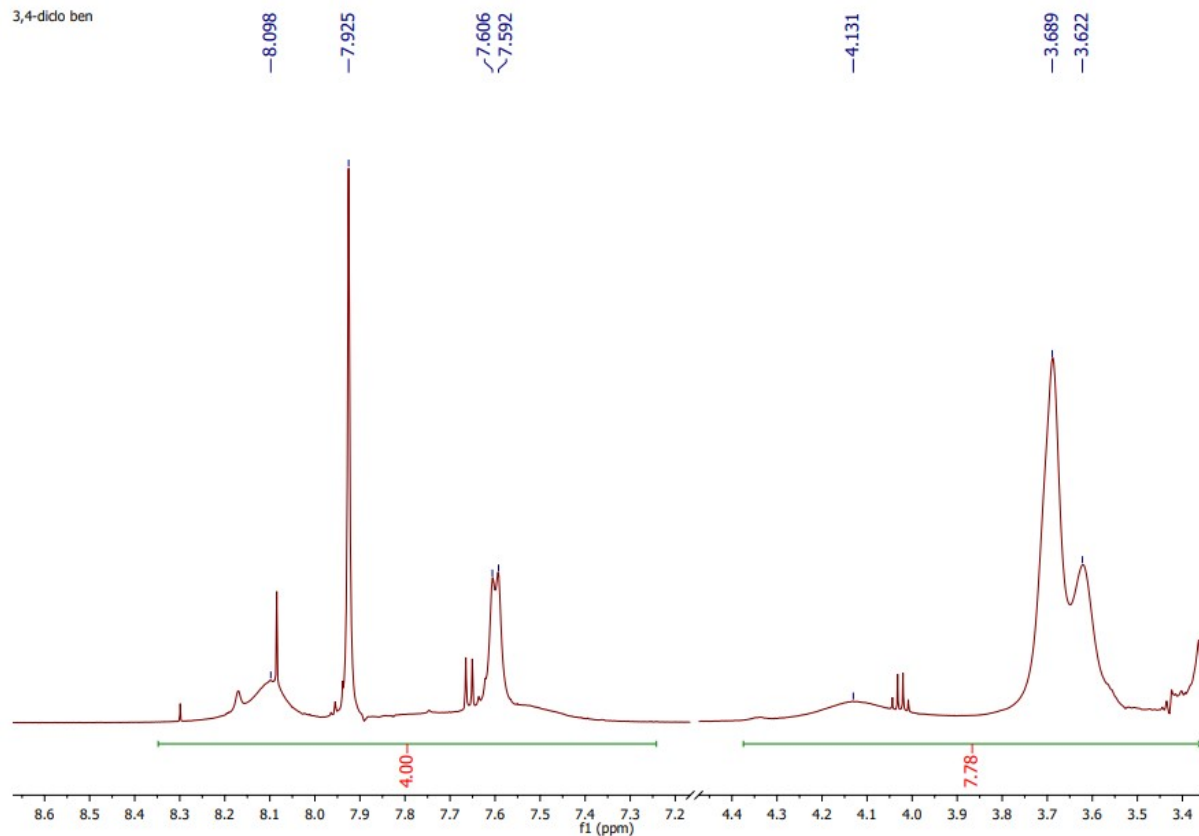

Compound **5b6** existed in the 2 conformers: the intramolecular hydrogen bonding and the non-intramolecular hydrogen bonding at approximate ratio of 5.4:4.5.

<sup>13</sup>C-NMR spectrum, 125 MHz, DMSO-*d*<sub>6</sub> with 0.03% v/v TMS (TMS peak was at 0 ppm)

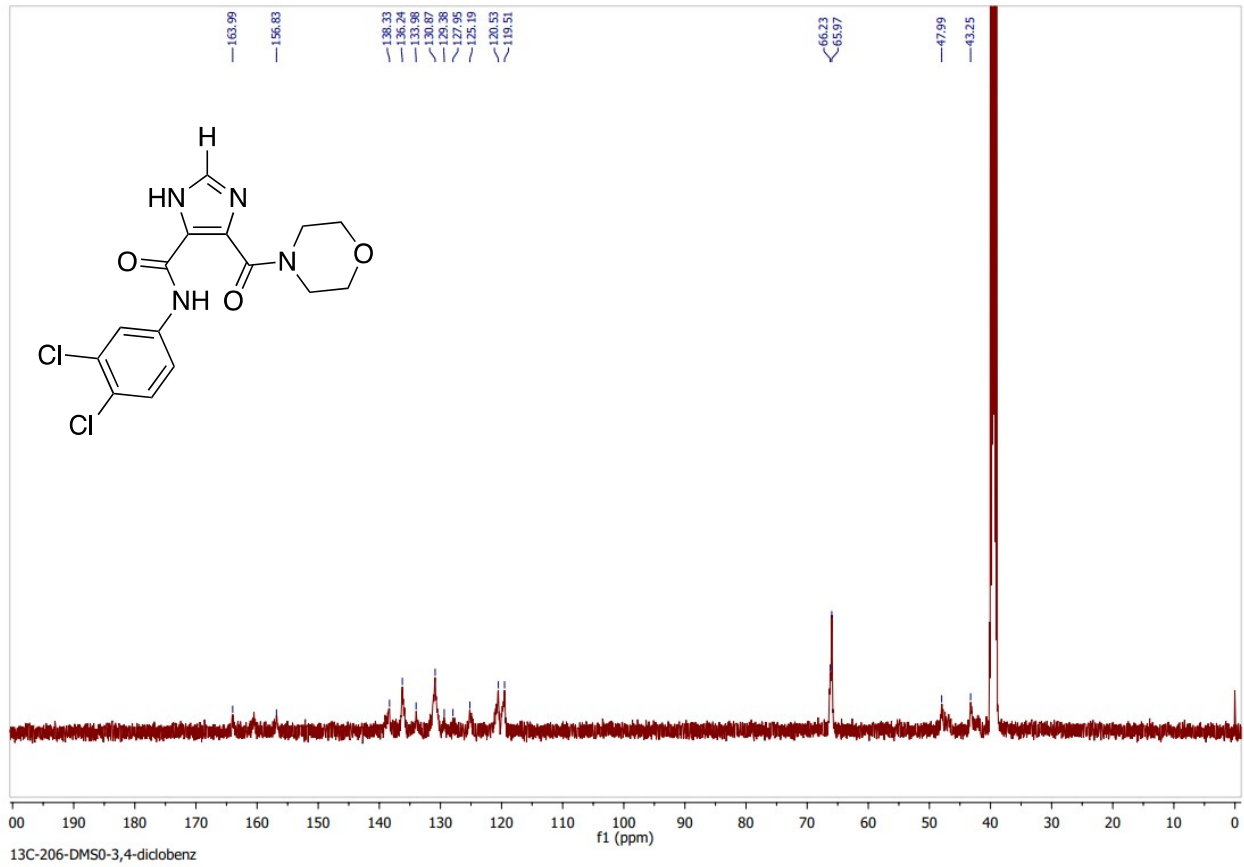

### Compound 5b7

#### IR spectrum

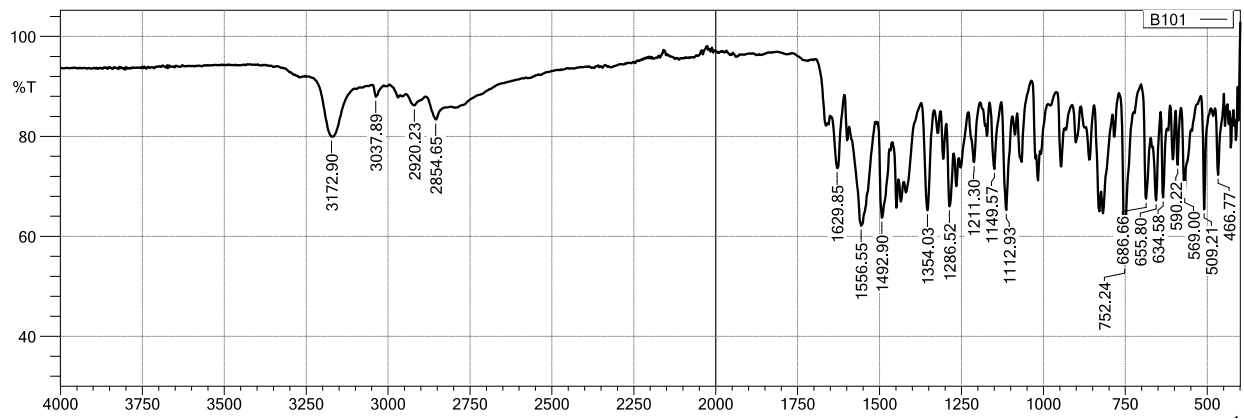

#### MS spectrum

MSMS: Precursor m/z ----- +/- Base Peak 447.14(4367677)

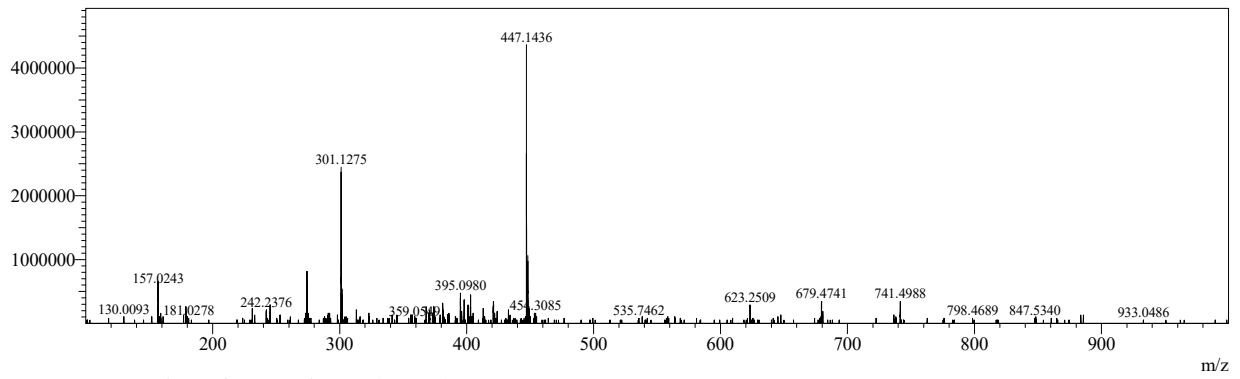

MSMS: Precursor m/z ----- /- Base Peak 194.93(5531948)

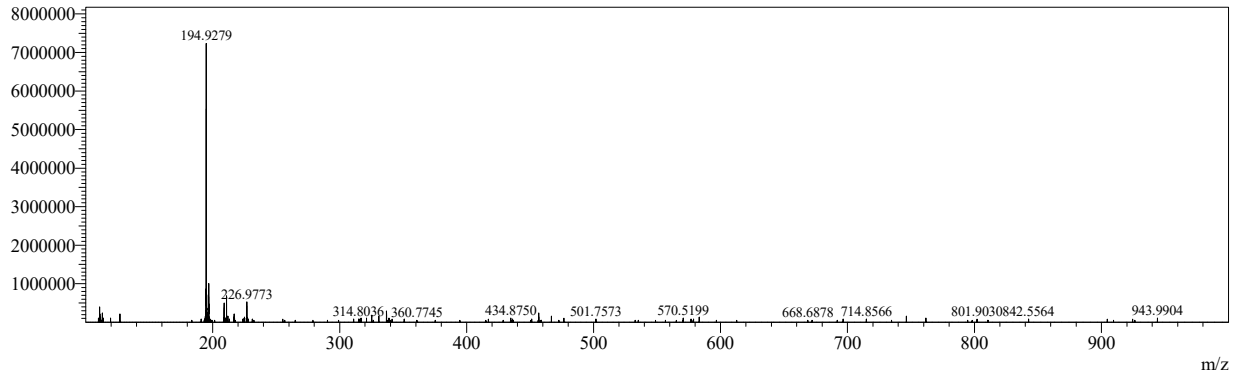

$^1\text{H-NMR}$  spectrum, 600 MHz,  $\text{DMSO-}d_6$

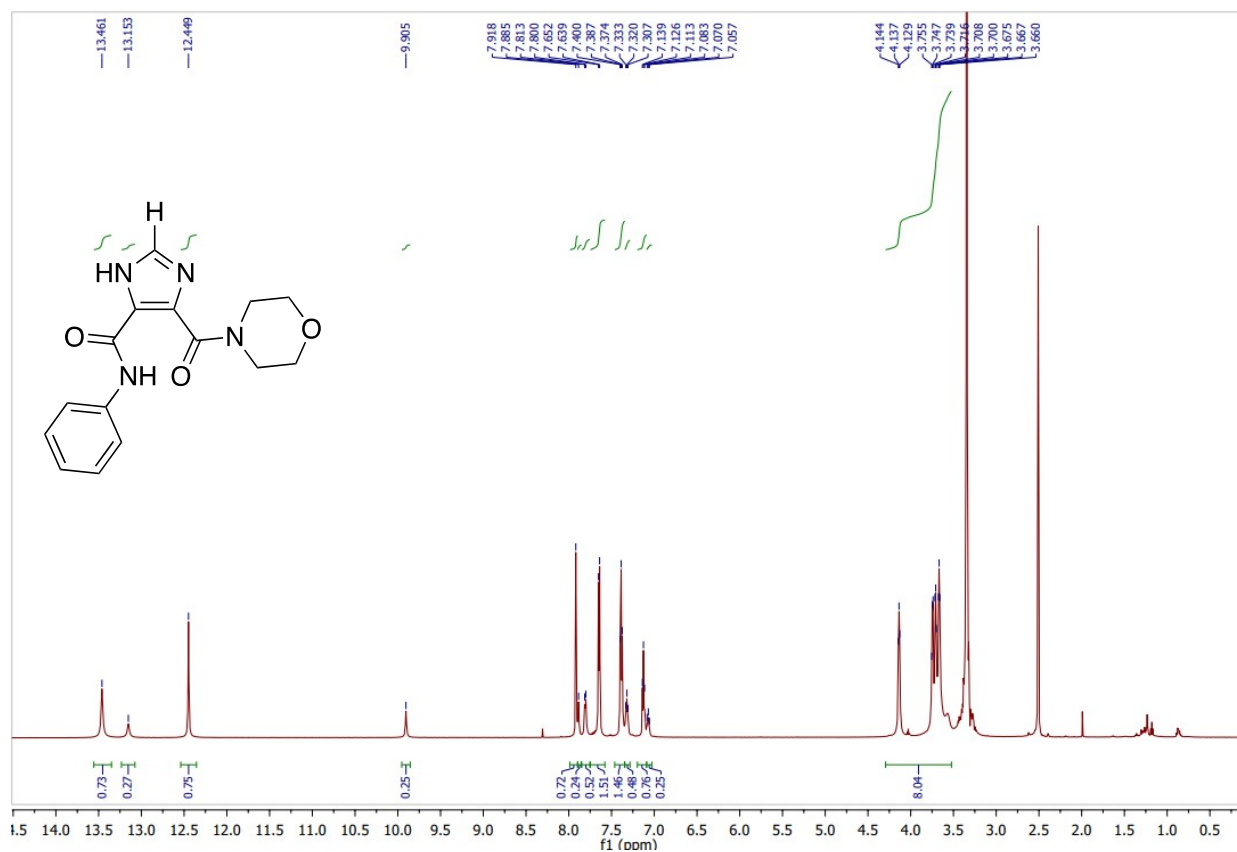

Compound **5b7** existed in the 2 conformers: the intramolecular hydrogen bonding and the non-intramolecular hydrogen bonding at approximate ratio of 7.5:2.5.

<sup>13</sup>C-NMR spectrum, 125 MHz, DMSO-*d*<sub>6</sub>



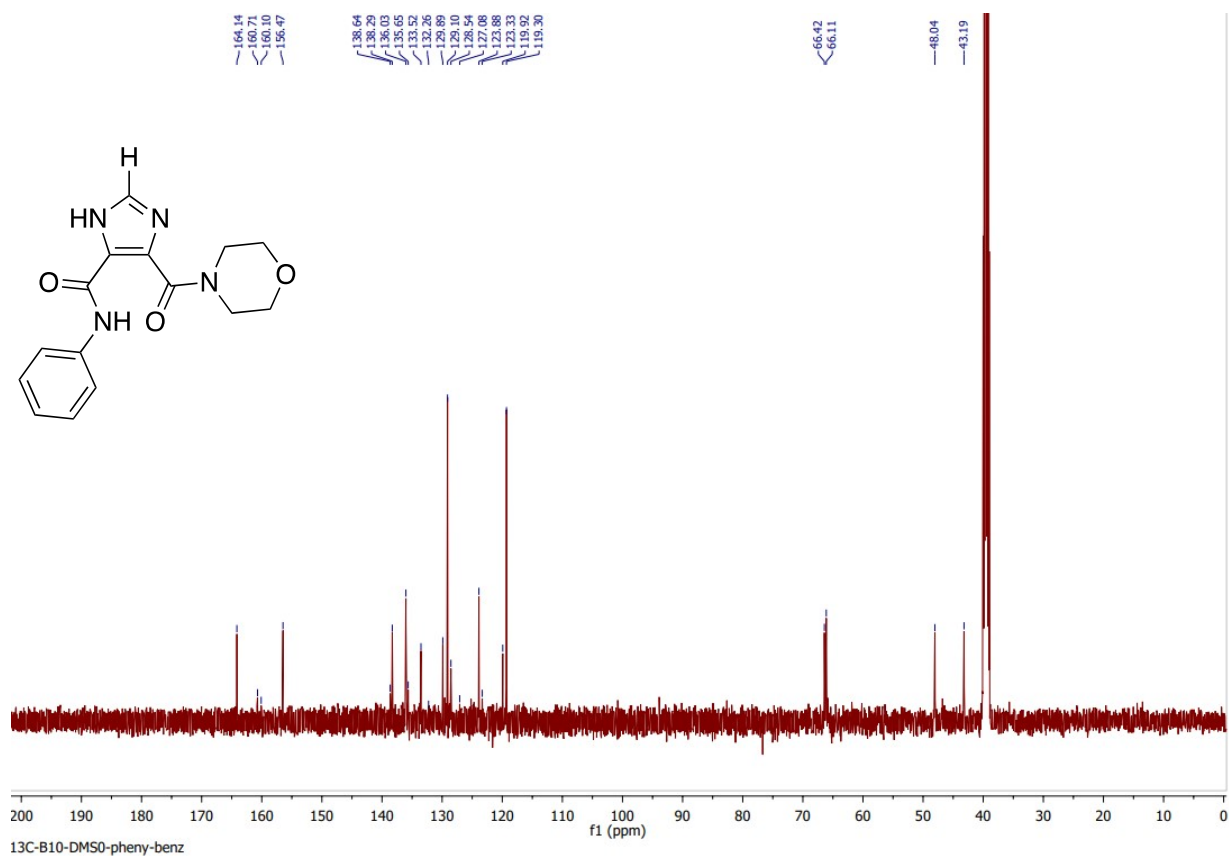

## 2. Screening for M<sup>pro</sup> inhibitory activity at 1 $\mu$ M

| Compound   | I%  | Compound   | I%  | Compound         | I%   |
|------------|-----|------------|-----|------------------|------|
| <b>5a1</b> | 38% | <b>5b1</b> | 18% | <b>Ritonavir</b> | 24%  |
| <b>5a2</b> | 38% | <b>5b2</b> | 3%  | <b>Lopinavir</b> | 33%  |
| <b>5a3</b> | 25% | <b>5b3</b> | 28% | <b>Ebselen</b>   | 100% |
| <b>5a4</b> | 28% | <b>5b4</b> | 30% |                  |      |
| <b>5a5</b> | 39% | <b>5b5</b> | 16% |                  |      |
| <b>5a6</b> | 33% | <b>5b6</b> | 33% |                  |      |
| <b>5a7</b> | 24% | <b>5b7</b> | 15% |                  |      |

## 3. Dose-response inhibition data

| 5a1             |          |        |
|-----------------|----------|--------|
| LogC ( $\mu$ M) | Mean (%) | SD (%) |
| -0.61           | 0.00     | 0.00   |
| -0.31           | 0.00     | 0.00   |

|       |        |      |
|-------|--------|------|
| -0.01 | 0.00   | 0.00 |
| 0.29  | 5.09   | 7.19 |
| 0.59  | 23.49  | 9.66 |
| 0.89  | 41.34  | 3.83 |
| 1.19  | 79.47  | 7.10 |
| 1.49  | 93.39  | 9.35 |
| 1.80  | 100.00 | 0.00 |
| 2.10  | 100.00 | 0.00 |
| 2.40  | 100.00 | 0.00 |
| 2.70  | 100.00 | 0.00 |

---

**5a2**

| <b>LogC (μM)</b> | <b>Mean (%)</b> | <b>SD (%)</b> |
|------------------|-----------------|---------------|
| -0.61            | 0.00            | 0.00          |
| -0.31            | 1.81            | 2.56          |
| 0.29             | 28.19           | 0.51          |
| 0.59             | 39.44           | 5.27          |
| 0.89             | 52.69           | 3.99          |
| 1.49             | 74.10           | 7.32          |
| 1.80             | 84.33           | 10.04         |
| 2.10             | 96.59           | 4.82          |
| 2.40             | 100.00          | 0.00          |
| 2.70             | 100.00          | 0.00          |

---

**5a5**

| <b>LogC (μM)</b> | <b>Mean (%)</b> | <b>SD (%)</b> |
|------------------|-----------------|---------------|
| 0.19             | 0.00            | 0.00          |
| 0.49             | 0.00            | 0.00          |
| 0.80             | 5.56            | 7.86          |
| 1.10             | 46.94           | 4.95          |
| 1.70             | 100.00          | 0.00          |

|      |        |      |
|------|--------|------|
| 2.00 | 100.00 | 0.00 |
|------|--------|------|

**5a6**

| <b>LogC (μM)</b> | <b>Mean (%)</b> | <b>SD (%)</b> |
|------------------|-----------------|---------------|
| -1.31            | 11.00           | 10.42         |
| -1.01            | 6.67            | 9.43          |
| -0.71            | 14.67           | 7.13          |
| -0.41            | 9.33            | 6.80          |
| -0.11            | 15.00           | 5.66          |
| 0.19             | 37.00           | 7.79          |
| 0.80             | 55.00           | 7.79          |
| 1.10             | 42.00           | 3.56          |
| 1.40             | 54.67           | 1.70          |
| 1.70             | 100.00          | 0.00          |
| 2.00             | 100.00          | 0.00          |

**5b6**

| <b>LogC (μM)</b> | <b>Mean (%)</b> | <b>SD (%)</b> |
|------------------|-----------------|---------------|
| 0.29             | 8.61            | 6.12          |
| 0.59             | 9.88            | 7.01          |
| 0.89             | 10.75           | 7.71          |
| 1.19             | 37.58           | 2.54          |
| 1.49             | 38.76           | 6.42          |
| 1.80             | 62.88           | 6.52          |
| 2.10             | 100.00          | 0.00          |
| 2.40             | 100.00          | 0.00          |
| 2.70             | 100.00          | 0.00          |

**4. Dose-response Inhibition of ebselen against SARS-CoV-2 M<sup>pro</sup>**

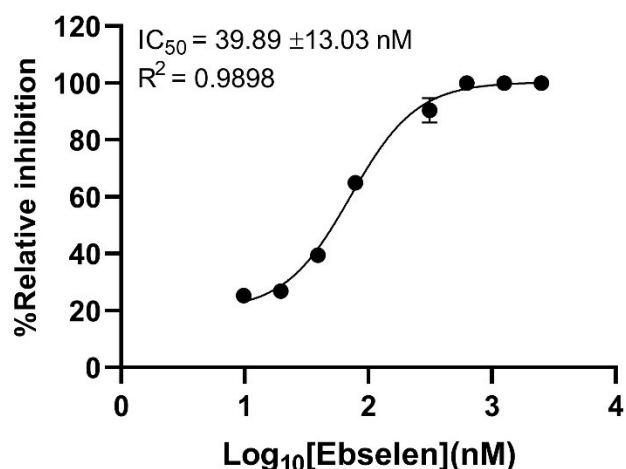

**5. Enzyme kinetic inhibition plots of SARS-CoV-2 M<sup>pro</sup> inhibition by 5a2 (Mean±SD%)**

| [S] (μM) | [I] (μM)    |             |             |
|----------|-------------|-------------|-------------|
|          | 0           | 2.5         | 5           |
| 80       | 0.269±0.055 | 0.282±0.056 | 0.313±0.064 |
| 60       | 0.363±0.085 | 0.412±0.126 | 0.409±0.082 |
| 40       | 0.452±0.047 | 0.486±0.023 | 0.570±0.050 |
| 20       | 0.571±0.025 | 0.690±0.066 | 0.850±0.036 |
| 10       | 1.081±0.056 | 1.272±0.158 | 1.558±0.236 |

**6. The cytotoxic effect on 16HBE14o cell line of potential compounds**

| Compound | Mean (%) | SD (%) |
|----------|----------|--------|
| 0.2%DMSO | 100.00   | 4.02   |
| 5a1      | 100.84   | 7.78   |
| 5a2      | 91.65    | 3.53   |
| 5a5      | 99.52    | 9.13   |
| 5a6      | 97.02    | 1.89   |
| 5a7      | 95.35    | 1.61   |

**7. The distribution of the four substituents of the native ligand across the four pockets (S1-4) of the binding site in SARS-CoV-2's M<sup>pro</sup>**

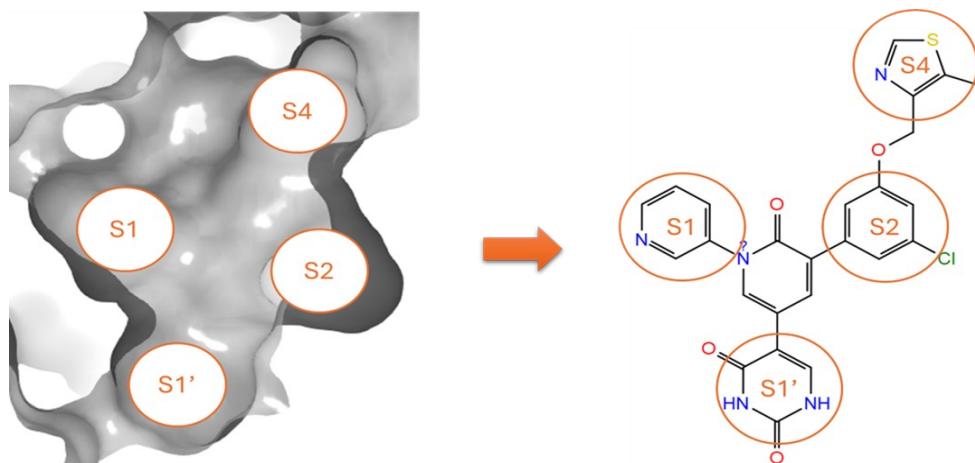

**Figure S1.** The distribution of the four substituents of the native ligand across the four pockets (S1-4) of the binding site (gray shape) (PDB: 7N44).
